23 <sup>6</sup>Department of Pathology, Molecular and Cell-Based Medicine, Icahn School of  
24 Medicine at Mount Sinai, New York, New York, USA

25 <sup>7</sup>Department of Electrical and Computer Engineering, KLESSE School of Engineering  
26 and Integrated Design, University of Texas at San Antonio, San Antonio, TX, USA

27 <sup>8</sup>Cancer Therapeutics Program, UPMC Hillman Cancer Center, University of Pittsburgh  
28 School of Medicine, Pittsburgh, PA, USA

29

30 †These authors contributed equally to this work.

31 \*Corresponding authors. Emails: [yuh119@pitt.edu](mailto:yuh119@pitt.edu); [gaos8@upmc.edu](mailto:gaos8@upmc.edu)

## 32 **Abstract**

33           Despite intensive studies during the last 3 years, the pathology and underlying  
34 molecular mechanism of coronavirus disease 2019 (COVID-19) remain poorly defined.  
35 Here, we examined postmortem COVID-19 lung tissues by spatial single-cell  
36 transcriptome analysis (SSCTA). We identified 18 major parenchymal and immune cell  
37 types, all of which are infected by SARS-CoV-2. Compared to the non-COVID-19  
38 control, COVID-19 lungs have reduced alveolar cells (ACs), and increased innate and  
39 adaptive immune cells. Additionally, 19 differentially expressed genes in both infected  
40 and uninfected cells across the tissues mirror the altered cellular compositions. Spatial  
41 analysis of local infection rates revealed regions with high infection rates that are  
42 correlated with high cell densities (HIHD). The HIHD regions express high levels of  
43 SARS-CoV-2 entry-related factors including ACE2, FURIN, TMPRSS2, and NRP1, and  
44 co-localized with organizing pneumonia (OP) and lymphocytic and immune infiltration  
45 that have increased ACs and fibroblasts but decreased vascular endothelial cells and  
46 epithelial cells, echoing the tissue damage and wound healing processes. Sparse non-  
47 negative matrix factorization (SNMF) analysis of neighborhood cell type composition  
48 (NCTC) features identified 7 signatures that capture structure and immune niches in  
49 COVID-19 tissues. Trajectory inference based on immune niche signatures defined two  
50 pathological routes. Trajectory A progresses with primarily increased NK cells and  
51 granulocytes, likely reflecting the complication of microbial infections. Trajectory B is  
52 marked by increased HIHD and OP, possibly accounting for the increased immune  
53 infiltration. The OP regions are marked by high numbers of fibroblasts expressing  
54 extremely high levels of COL1A1 and COL1A2. Examination of single-cell RNA-seq

55 data (scRNA-seq) from COVID-19 lung tissues and idiopathic pulmonary fibrosis (IPF)  
56 identified similar cell populations primarily consisting of myofibroblasts.  
57 Immunofluorescence staining revealed the activation of IL6-STAT3 and TGF- $\beta$ -  
58 SMAD2/3 pathways in these cells, which likely mediate the upregulation of COL1A1 and  
59 COL1A2, and excessive fibrosis in the lung tissues. Together, this study provides an  
60 SSCTA atlas of cellular and molecular signatures of fatal COVID-19 lungs, revealing the  
61 complex spatial cellular heterogeneity, organization, and interactions that characterized  
62 the COVID-19 lung pathology.

63

64 **Key words:** SSCTA, spatial single-cell transcriptome analysis; COVID-19, coronavirus  
65 disease 2019; SARS-CoV-2; SNMF, sparse non-negative matrix factorization analysis;  
66 NCTC, neighborhood cell type composition analysis; trajectory inference; organizing  
67 pneumonia; fibrosis; IL6-STAT3; TGF- $\beta$ -SMAD2/3



## 68 **Introduction**

69 Multiple single-cell RNA-seq (scRNA-seq) analyses of coronavirus disease 2019  
70 (COVID-19) patients with different severities have improved our understanding of  
71 cellular diversity associated with infection and provided important molecular insights into  
72 the host immune response [1-5]. Despite intensive studies in the last 3 years, the  
73 pathology and underlying molecular mechanism of COVID-19 remain unclear. Severe  
74 COVID-19 is often accompanied by diffuse alveolar damage (DAD) that presents  
75 complex pathological manifestations and is heterogeneous within infected tissues and  
76 across patients [6]. The dissociation of tissue localization of cells in scRNA-seq has  
77 become a bottleneck to decoding the pathology features at the molecular and cellular  
78 levels and failed to reveal the immune signatures of the microenvironment for severe  
79 COVID-19.

80 Spatial single-cell transcriptome analysis (SSCTA) promises to reveal the  
81 molecular basis of cellular heterogeneity, organization, and interactions in tissues and  
82 organs [7, 8]. However, analysis of these complex datasets including defining the spatial  
83 cellular organizations, immune microenvironment patterns, cell-cell interactions, and  
84 molecular signatures associated with disease pathophysiology remains a daunting task.

85 Here, we utilized SSCTA to examine postmortem lung tissues from 5 cases with  
86 severe COVID-19 and one case without COVID-19. From 10,414,863 detected  
87 transcripts of cellular 221 genes from six tissues, we identified 1,719,459 cells that were  
88 mapped to 18 major parenchymal and immune cell types, all of which are infected by  
89 SARS-CoV-2. We further identified the spatial cellular and molecular signatures that  
90 define the patterns of SARS-CoV-2 infection, structural and pathological presentations,

91 and associated immune microenvironments, which project the trajectories of disease  
92 progression. Together, this study provides an atlas of cellular and molecular signatures  
93 of fatal COVID-19 lungs and reveals the complex spatial cellular heterogeneity,  
94 organization, and interactions that characterize COVID-19 lung pathology.

95

## 96 **Results**

### 97 **Spatial single-cell transcriptome analysis, cell segmentation, cell typing, and** 98 **spatial mapping of cells.**

99 Postmortem lung tissues from five COVID-19 autopsies and one postmortem  
100 case without COVID-19 were subjected to SSCTA (Fig. 1A). All five COVID-19 cases  
101 contracted SARS-CoV-2 in the first wave of the pandemic and had underlying  
102 conditions [9], including hypertension (cases 1-3), HIV infection and asthma (case 2),  
103 and Parkinson's and chronic kidney diseases (cases 4 and 5). Hematoxylin and eosin  
104 (H&E) stains revealed various degrees of diffuse alveolar diseases (DAD), pulmonary  
105 thromboembolism, and lymphocytic infiltration in all cases (Fig. S1). Tissues 1 and 2 (1-  
106 2C and 2-1A) had prominent organizing pneumonia (OP) or organizing diffuse alveolar  
107 damage while edema, hyaline membrane, and fibrin clot or microthrombi were  
108 prominent in tissues 3, 4, and 5 (3-1A, 4-3B and 5-3B). We designed probes for  
109 detecting the SARS-CoV-2 genome and 221 cellular genes covering markers of  
110 common lung parenchymal and immune cells, and immune and inflammatory genes  
111 induced by viral infections (Table S1). Following hybridization and gene decoding by *in-*  
112 *situ* sequencing, we stained the tissues with 4',6-diamidino-2-phenylindole (DAPI) (Fig.  
113 S2) to facilitate cell segmentation (Fig. S2).

114 A workflow was developed to analyze the SSCTA data (Fig. 1B). We detected  
115 869,453 to 3,424,675 reads in the six lung tissues for a total of 10,414,863 reads (Table  
116 S2 and Fig. S3A). Using the Baysor algorithm [10], we segmented ~89%-95% of reads  
117 into cells based on DAPI staining and the spatial distribution of reads (Fig. S4). We  
118 identified 186,659 to 470,294 cells for each sample for a total of 1,719,459 cells in these  
119 tissues (Table S2 and Fig. S3B). Over 99% of the cells harbored at least 5-15 reads  
120 (Fig. S5). We further filtered the cells deemed low quality (see Methods) and retained a  
121 total of 779,137 cells for the subsequent analyses.

122 We summarized the reads for each gene and normalized the gene reads of  
123 segmented cells using *scTransform* [11]. We assigned cell types to 70-84% of the  
124 segmented cells based on the expressions of cell type-specific markers (Table S1) and  
125 identified a total of 18 cell types including 11 types of parenchymal cells and 7 types of  
126 immune cells in all six tissues (Fig. 1C and S6). We used Uniform Manifold  
127 Approximation and Projection (UMAP) to visualize the relationship of gene expressions  
128 of individual cells associated with different cell types in all tissues (Fig. 1D and S7).  
129 There were negligible batch differences as cells from different samples mixed well in  
130 individual cell clusters (Fig. 1D and S7). We noticed separated clusters for major  
131 parenchymal cells including alveolar cells (ACs) and fibroblasts. By contrast, immune  
132 cells were grouped together and mixed with vascular endothelial cells (VECs) in several  
133 clusters (Fig. 1D). The poor separation of immune cell types was largely due to highly  
134 expressed immunoglobulin kappa light chain (IGKC) and cathepsin L (CTSL) in these  
135 cell types (Fig. S8).

136 We then mapped the individual cells to their spatial locations in the tissues (Fig.  
137 S9) and performed the neighborhood cell type composition (NCTC) analysis by  
138 computing a vector of 18 cell-type percentages in the neighborhood of individual cells.  
139 NCTC reveals spatial variations of the local cell type composition and informs local  
140 interplays among cell types. In agreement with the observed pathology that showed  
141 DAD in all COVID-19 tissues (Fig. S1), NCTC uncovered disorganized distributions of  
142 various cell types, especially the major parenchymal cells such as ACs, VECs, and  
143 fibroblasts (Fig. 1E, S1, and S10-S14). In contrast, organized structures and orderly  
144 distributions of these cell types were observed in the non-COVID-19 tissue (PBC-PR)  
145 (Fig. 1E, S1, and S15). Examination of regions with blood vessels revealed the lining of  
146 VECs along the vessels together with other vessel-associated cells including ACs,  
147 fibroblasts, and smooth muscle cells (SMCs) (Fig. 1E and S16). Furthermore, we  
148 observed abundant infiltrating immune cells including macrophage and monocytes  
149 (MMs), natural killer (NK) cells, and T- and B-cells along regions of blood vessels (Fig.  
150 1E and S10-S14). We also observed the expected cell compositions of other structures  
151 including bronchiole, capillary, and endothelium (Fig. S17). These results validated the  
152 marker-based cell typing approach.

153

154 **SARS-CoV-2 infection alters the cell compositions of major parenchymal cells**  
155 **and induces immune infiltrations.**

156 In agreement with the results of our previous study [9], we found SARS-CoV-2  
157 reads in diverse cell types with infection rates ranging from 0.6% to 5% except that no  
158 infected cell was detected in the small number of erythrocytes (55) identified in tissue 1

159 (Fig. 1D, 1F, S7 and Table S3). Most infected cells were identified as ACs, fibroblasts,  
160 VECs, and MMs as they were the major cell types in the COVID-19 tissues (Fig. 1F).

161 Consistent with the tissue pathology, we observed significant alterations in the  
162 compositions of different cell types in COVID-19 tissues compared to the non-COVID-  
163 19 tissue (Fig. 1E and 1F). Among the parenchymal cells, there were reduced numbers  
164 of ACs from 44.08% to 12.81-28.23% and SMCs from 5.22% to 1.72-3.05%, and  
165 increased numbers of epithelial cells (ECs) from 2.08% to 2.40-8.42%, ionocytes from  
166 0.22% to 0.41-1.36% and basal cells from 0.25% to 0.31-1.58%, suggesting their likely  
167 involvements in COVID-19 lung pathology (Fig. 1E, 1F, and Table S3). Furthermore, we  
168 observed increases in cell numbers of most types of the identified immune cells in  
169 COVID-19 tissues (Fig. 1E, 1F, and Table S3). In particular, there were increased  
170 inflammatory cells including MMs from 9.4% to 17.51-21.37% and NK cells from 1.00%  
171 to 2.32-9.19%, and adaptive immune cells including T cells from 2.40% to 4.34-6.81%  
172 and B cells from 1.91% to 2.70-10.51%, which were consistent with the reported  
173 inflammatory and cellular immune response following SARS-CoV-2 infection [12].  
174 However, these changes were more subtle for some cell types in tissue 1, which had  
175 the least infected cells and mildest pathological manifestations with the best integrity of  
176 parenchymal cells among all COVID-19 tissues (Fig. 1E, 1F, S1, and S10).

177

178 **SARS-CoV-2 infection induces global differential gene expressions that marked**  
179 **pathological damages and inflammation with spatial cellular features.**

180 We examined the differential gene expression between COVID-19 and non-  
181 COVID-19 lung tissues, and identified 9 upregulated and 10 downregulated genes,

182 respectively (Fig. 2A, first panel). Comparison of SARS-CoV-2-infected cells in COVID-  
183 19 tissues with all cells in the non-COVID-19 tissue confirmed the differential  
184 expressions in 16 of these 19 genes (Fig. 2A, second panel). Interestingly, differential  
185 gene expressions were also observed in 18 of these 19 genes between uninfected cells  
186 in COVID-19 tissues and all cells in the non-COVID-19 tissue (Fig. 2A, third panel). In  
187 contrast, there were only 3 differentially expressed genes between SARS-CoV-2-  
188 infected and -uninfected cells in the COVID-19 tissues (Fig. 2A, fourth panel). These  
189 results indicated that there were strong indirect effects such as those mediated by  
190 cytokines and complement activation induced by SARS-CoV-2 infection that likely  
191 contributed to the dysregulated gene expressions and pathology in COVID-19 lung  
192 tissues. Thus, we focused on comparing COVID-19 tissues with the non-COVID-19  
193 tissue in subsequent analyses of dysregulated genes.

194         The expressions of the 19 dysregulated genes in different cell types and their  
195 tissue distributions had significant variations suggesting their complex involvements in  
196 different aspects of SARS-CoV-2 infection and COVID-19 lung pathology (Fig. 2B, 2C,  
197 S8, and S18-S23). We determined the contributions of individual cell types to the  
198 expressions of these genes across all the tissues (Fig. 2D). Of the 19 genes, 10 of them  
199 were cell markers (Table S1). All 6 parenchymal cell markers including SFTPC,  
200 SFTPA1, and advanced glycosylation end product (AGE) receptor (AGER) for ACs,  
201 INMT for fibroblasts, smooth muscle actin alpha 2 (ACTA2) for SMCs, and claudin 5  
202 (CLDN5) for VECs were downregulated, and mainly expressed in their respective cell  
203 types (Fig. 2A, first panel, 2C, 2D, S8 and S18-S23), of which ACs and SMCs had  
204 decreased cell numbers in COVID-19 tissues (Fig. 1E, 1F and S7). Both SFTPC and

205 SFTPA1 are implicated in lung homeostasis and functions, and their mutations and  
206 dysregulation are associated with pulmonary fibrosis [13-15]. Additionally, SFTPA1, a  
207 C-type lectin, which binds to specific carbohydrate moieties on lipids and the surface of  
208 microorganisms, is essential in the defense against respiratory pathogens [16-18] while  
209 the pulmonary-associated surfactant protein C encoded by SFTPC is a marker for  
210 COVID-19 patients with high viral loads [19]. AGER, predominantly expressed in ACs  
211 (Fig. 2C), is a multiligand receptor interacting with AGE and other molecules implicated  
212 in lung homeostasis, development and inflammation, and certain diseases such as  
213 diabetes and Alzheimer's disease, and regulates diverse pathways including MyD88-  
214 dependent, nuclear receptors, TNF- $\alpha$ , ERK1/2 and p38 MAPK, and p53/TP53 pathways  
215 [20-23]. Following interaction with S100A12, AGER triggers the activation of  
216 mononuclear phagocytes, lymphocytes, and endothelium by generating key pro-  
217 inflammatory mediators [24]. Indeed, AGER-related pathways are activated by SARS-  
218 CoV-2 infection and are implicated in the COVID-19 lung pathology [25, 26]. ACTA2  
219 encodes a smooth-muscle actin involved in lung functions including cell motility, tissue  
220 structure and integrity, and intercellular signaling [27]. Dysregulation of ACTA2 is linked  
221 to a variety of vascular diseases as well as multisystemic smooth muscle dysfunction  
222 syndrome [28, 29]. CLDN5 is an integral membrane protein and component of tight  
223 junction strands regulating the integrity of epithelial or endothelial cell sheets, and  
224 immune cell transmigration [30-32]. SARS-CoV-2 infection suppressed CLDN5  
225 expression contributing to the disruption of respiratory vascular barriers [33]. Thus,  
226 downregulations of parenchymal cell markers including SFTPC, SFTPA1 and AGER in

227 ACs, ACTA2 in SMCs, and CLDN5 in VECs might be involved in SARS-CoV-2 infection  
228 and COVID-19 lung pathology (Fig. 2D).

229 Several other downregulated genes including caveolin 1 (CAV1) and alpha-2-  
230 macroglobulin (A2M) are implicated in numerous lung functions (Fig. 2A). CAV1, a  
231 component of caveolae involved in multiple pathways such as integrins-mediated and  
232 Ras-ERK signaling, is essential for lung functions and during the host response to  
233 infections [34, 35]. A2M is an inhibitor of broad spectrum of proteases including trypsin,  
234 thrombin, and collagenase [36, 37]. It disrupts inflammatory cascades by inhibiting  
235 inflammatory cytokines, is implicated in Alzheimer's disease, and regulates extracellular  
236 matrix organization and platelet cytosolic Ca<sup>2+</sup> [36, 37]. CAV1 and A2M were  
237 downregulated and mainly expressed by ACs, fibroblasts, VECs, and MMs (Fig. 2A, first  
238 panel, 2D, S8, and S18-S23), of which ACs and fibroblasts had decreased while MMs  
239 had increased cell numbers in COVID-19 tissues (Fig. 1F).

240 Three upregulated immune marker genes including complement component C1q,  
241 A chain (C1QA) and B chain (C1QB), and neural cell adhesion molecule 1 (NCAM1) are  
242 involved in innate immune response and inflammation (Fig. 2A, first panel) [38, 39].  
243 C1QA and C1QB were predominantly expressed in MMs (Fig. 2D, S8 and S18-S23).  
244 SARS-CoV-2 infection induced robust complement activation, contributing to tissue  
245 damage and COVID-19 lung pathology [40-42]. Both cathepsin L (CTSL) and granzyme  
246 K (GZMK) could be involved in complement activation [43, 44]. CTSL was induced after  
247 SARS-CoV-2 infection and enhanced SARS-CoV-2 infection [45] while GZMK, a serine  
248 protease from the cytoplasmic granules of cytotoxic lymphocytes (CTL) and NK cells  
249 that recognize and lyse specific target cells [46], could limit the spread of SARS-Co-V-2.



250 Both CTSL and GZMK were upregulated and mainly expressed by ACs, fibroblasts,  
251 MMs, and VECs while CTSL exhibited a comparable expression level but with  
252 extremely high levels in localized regions in COVID-19 tissues (Fig. 2A, 2B, 2C, 2D, S8  
253 and S18-S23). NCAM1, the marker of NK cells, is a member of the immunoglobulin  
254 superfamily involved in cell-to-cell interactions as well as cell-matrix interactions [47].  
255 The upregulations of C1QA, C1QB, CTSL, GZMK, and NCAM1 were consistent with the  
256 increased numbers of MMs and NK cells in COVID-19 tissues (Fig. 1F, S8, and S18-  
257 S23). Thus, increased infiltrations of MMs and NK cells were likely involved in COVID-  
258 19 lung complement activation and inflammation.

259 Two immune-modulating cytokines were upregulated including colony-stimulating  
260 factor 3 (CSF3), a member of the IL-6 superfamily of cytokines that controls the  
261 production, differentiation, and function of granulocytes involved in the innate immune  
262 response [48, 49], and inducible T cell costimulator ligand (ICOSLG or B7-H2) involved  
263 in positive regulation of interleukin-4 production and CD28 signaling in T-helper cells  
264 [50, 51]. The major cells that expressed CSF3 and its receptor CSF3R, as well as  
265 ICOSLG and its receptor ICOS, were ACs, fibroblasts, VECs, and MMs (Fig. 2D).

266 Numerous other upregulated genes in COVID-19 tissues are involved in  
267 inflammatory and immune responses (Fig. 2A). Leukocyte-specific transcript 1 (LST1), a  
268 myeloid leukocyte-specific transmembrane adaptor protein recruiting protein tyrosine  
269 phosphatases SHP-1 and SHP-2 to the plasma membrane, inhibits the proliferation of  
270 lymphocytes, and its expression is enhanced by lipopolysaccharide (LPS), interferon-  
271 gamma (IFN- $\gamma$ ) and bacteria [52, 53]. Immunoglobulin kappa light chain (IGKC) is  
272 essential for antibody production but is also expressed in non-lymphoid cells [54-56].

273 Both LST1 and IGKC were mainly expressed in ACs, fibroblasts, VECs and MMs (Fig.  
274 2B-E, S8 and S18-S23), which might mediate dysregulation of immune cells in COVID-  
275 19 lung tissues. Finally, fibulin 1 (FBLN1), a secreted glycoprotein incorporated into a  
276 fibrillar extracellular matrix in a calcium-dependent manner and mediates platelet  
277 adhesion via binding fibrinogen [57, 58], was mainly expressed in ACs, fibroblasts,  
278 VECs, and MMs (Fig. 2D).

279 We examined differential gene expressions in cell types that had significant  
280 changes in cell numbers (Fig. 1F). Compared to non-COVID-19 tissue, ACs from  
281 COVID-19 tissues had 20 differentially expressed genes, of which 14 were identified at  
282 the whole tissue level (Fig. 2A, first panel and 2E). The most upregulated genes were  
283 LST1, CTSL, IGKC, ICOSLG, C1QB, GZMK, and NCAM1 while the most  
284 downregulated genes were SFTPC, A2M, SFTPA1, CLDN5, and CAV1 (Fig. 2E), which  
285 likely contribute to the decreased cell numbers in COVID-19 tissues (Fig. 1F). Several  
286 differentially expressed genes were also identified in fibroblasts, VECs and ECs (Fig.  
287 2E). Among the immune cells, MMs had the most differentially expressed genes  
288 including upregulation of C1QB, NCAM1, and IGKC, and downregulation of A2M, CD68,  
289 TYROBP and PRG4 (Fig. 2E).

290

291 **Spatial analysis identifies regions with high SARS-CoV-2 infection rates that**  
292 **match high cell densities, high levels of viral entry-related factors, and localized**  
293 **pathology.**

294 Even though we did not observe notable global differences in gene expression  
295 between infected and uninfected cells within each COVID-19 tissue, the spatial nature

296 of the SSCTA permitted the identification of the local impact of SARS-CoV-2 infection  
297 on lung pathology. We performed the local infection rate analysis to examine the spatial  
298 distributions of local SARS-CoV-2 infection (Fig. 3A) and identified regions with high  
299 and low infection rates in each tissue (Fig 3B; local Moran's I, p-value < 0.05). SARS-  
300 CoV-2 infects host cells by binding to its entry receptor, angiotensin-converting enzyme  
301 2 (ACE2), and subsequent engagement of host proteases and other entry-related  
302 factors including FURIN, transmembrane protease, serine 2 (TMPRSS2), and neuropilin  
303 1 (NRP1) [59]. We assessed the spatial correlation between high-infection regions and  
304 cells expressing transcripts of these viral entry-related proteins. We found a significant  
305 correlation between high infection rates and high expressions of ACE2, FURIN,  
306 TMPRSS2, and NRP1 (Fig. 3C; bivariate local Moran's I, p-value < 0.05), supporting the  
307 essential roles of these cellular proteins in SARS-CoV-2 infection in lung tissues.

308         Previous studies reported increased densities of both parenchymal and immune  
309 cells in COVID-19 lung tissues [6]. Here, we observed a positive spatial correlation  
310 between cell densities and SARS-CoV-2 infection rates especially in tissues 1-4 (Fig.  
311 3D, Table S4), suggesting that increased cell densities might be associated with high  
312 infection rates. We segmented regions with high infection rates and high cell densities  
313 (HIHD) (Fig. 3E; bivariate local Moran's I, p-value < 0.05). Compared with H&E staining  
314 (Fig. S1), we found a close association between HIHD and OP, which was most  
315 prominent in tissues 1 and 2, as well as lymphocytic and immune infiltration, which was  
316 most severe in tissues 3 and 4 (Fig. 3E). Both are the most common lung pathological  
317 manifestations in COVID-19 lungs [12]. Hence, high infection rates might cause  
318 persistent damages to the lung tissues, resulting in the infiltration of immune cells, and

319 increased wound repair and fibrosis [60, 61]. We also observed HIHD areas adjacent to  
320 blood vessels in tissues 1 and 3 (Fig. 3E and S1), which might be due to the homing of  
321 the circulating virus and immune cells in the bloodstream to these sites or that these  
322 cells were more susceptible to SARS-CoV-2 infection [9, 62].

323

324 **Regions with high SARS-CoV-2 infection rates have unique cellular and gene**  
325 **expression features.**

326 We next examined cell type compositions of the high and low SARS-CoV-2  
327 infection regions. Compared to low-infection regions across the tissues, the  
328 compositions in high-infection regions exhibited significant increases in fibroblasts,  
329 echoing the observed OP in HIHD areas, and an increase in ACs, possibly due to the  
330 proliferation of ACs response to injury repair of alveoli and alveoli capillaries (Fig. 3E  
331 and 4A). However, there were decreases in ECs and VECs, which might reflect the  
332 damages caused by the infection (Fig. 3E and 4A). These results suggested that high-  
333 infection regions might suffer more damages. However, except for T cells and  
334 granulocytes, the compositions of major immune cell types including MMs between high  
335 and low infection regions remained similar (Fig. 4A), suggesting induction of a broad  
336 immune infiltration by SARS-CoV-2 infection, as well as the observed broad impact on  
337 the tissue-wide gene expression (Fig. 2A).

338 The patchwork of high infection regions in tissue 1 prompted us to inspect  
339 patterns of local cell-type compositions. Interestingly, NCTC analysis showed three  
340 clusters in high-infection regions, of which two were distinctly enriched with prominent  
341 local compositions of fibroblasts and ACs, respectively (Fig. 4B). Examining their spatial

342 distributions confirmed a negative *in-situ* correlation between local compositions of  
343 fibroblasts and ACs (-0.6, Pearson correlation), with regions showing high (low)  
344 compositions of fibroblasts accompanied with low (high) compositions of ACs (Fig. 4B  
345 and C). Strikingly, the local regions with high fibroblasts but low ACs were mostly  
346 annotated OP regions (Fig. S1).

347         We next investigated the gene expression patterns in the high- and low-infection  
348 regions. Compared with the normal tissue, the high and low infection regions presented  
349 highly consistent differential expression patterns as they shared 18 of the 20  
350 differentially expressed genes (Fig. 4D), confirming the strong indirect effect of SARS-  
351 CoV-2 infection (Fig. 2A). One of the two uniquely differentially expressed genes in high  
352 infection regions was again cytokine CSF3, which was upregulated in all infected  
353 tissues. We, therefore, investigated spatial co-expression of CSF3 and its receptor  
354 CSF3R (Fig. 3F) and found that their co-expression patterns also presented spatial  
355 correlations in high infection regions (Fig. 3G; bivariate local Moran's I, p-value < 0.05),  
356 suggesting that the CSF3-CSF3R axis might modulate the immune response in high-  
357 infection regions. In contrast to the consistent differentially expressed patterns of both  
358 high- and low-infection regions when compared with the normal control, direct  
359 comparison between high- and low-infection regions revealed distinct differentially  
360 expressed patterns. Particularly, we observed, in high- vs. low-infection regions,  
361 upregulation of AC markers SFTPA1 or SFTPA2 in tissues 1, 3, and 5 (Fig. 4E and 2C)  
362 and fibroblast markers COL1A1 or COL1A2 in all COVID-19 tissues (Fig. 4E and 4F),  
363 despite that SFTPA1 and COL1A2 displayed down-regulation in either high- or low-  
364 infection regions in COVID-19 tissues when compared to the normal tissue (Fig. 4D).

365 The increased expressions of these AC and fibroblast markers were also consistent  
366 with the observed increases in ACs and fibroblasts in high-infection regions in the  
367 corresponding tissues (Fig. 4A). Cell type-specific differential expressions further  
368 confirmed the upregulation of SFTPA1 or SFTPA2 in ACs, and COL1A2 in fibroblasts in  
369 infected tissues (Fig. 4E and S24). However, different cell types exhibited complex  
370 differential expression patterns between high vs. low infection regions in individual  
371 COVID-19 tissues (Fig. S24), likely due to the distinct COVID-19 pathologies or stages  
372 associated with the individual infected tissues.

373

374 **Sparse non-negative matrix factorization analysis identifies seven cell**  
375 **composition signatures that recapitulate different healthy and disease statuses.**

376 Although different DAD phases can inform COVID-19 severity, they are  
377 confounded by many factors including the underlying conditions of the patients as  
378 illustrated by our five COVID-19 cases (Fig. S1). Importantly, the complex tissue  
379 microenvironments of parenchymal and immune cells associated with different stages of  
380 DAD within and across tissues have not been well characterized. Therefore, we  
381 determined the extent to which tissue-independent and tissue-specific spatial patterns in  
382 spatially resolved cell-type compositions are associated with different DAD stages. For  
383 this purpose, we performed the sparse non-negative matrix factorization (SNMF) [63] of  
384 the NCTC vectors of all cells in all tissues. SNMF decomposed these NCTC vectors into  
385 a sparse linear combination of cell-type composition signatures that define spatial cell-  
386 type patterns in these tissues. We obtained a factorization of seven NCTC signatures  
387 after assessing the compactness and biological meanings of the factorization results for

388 different maximum numbers of factors (Fig. 5). Close examination of cell type  
389 compositions of the signatures (Fig. 5A and Table 5) and their spatial prevalence across  
390 all tissues (Fig. 5B) defined by the factor loading revealed their associations with normal  
391 structures, and broad and tissue-specific infection. Specifically, Signature 1 likely  
392 defined the cell type composition of “normal-like lung alveoli” because it has 56.4%  
393 ACs, 18.5% VECs, 11.9% fibroblasts, and 5.3% SMs, which were comparable to the  
394 percentages of the non-COVID-19 tissue (Fig. 1F and Table S3). Thus, the high-loading  
395 regions of Signature 1 in COVID-19 tissues might mark the less damaged regions.  
396 Naturally, the non-COVID-19 tissue had a high prevalence of Signature 1 (Fig. 5B and  
397 S25). Tissue 1 had the highest prevalence of Signature 1 among all COVID-19 tissues  
398 reflecting its least damaged pathology, followed by tissue 4, 3, 2, and 5 (Fig. 5B, S1,  
399 and S25). Signature 2 described a composition of 61% ECs, 14% ciliated cells, and  
400 10% basal cells. It had sparse but high-intensity loadings in localized regions identified  
401 as bronchial tubes (Fig. 5B and S1). In contrast to Signatures 1 and 2 which  
402 characterized cell-type compositions of normal structures, Signature 3 captured the  
403 “broad immune infiltration” as it contained 28.6% B cells, 22.3% MMs, 17.5% T cells,  
404 9.6% granulocytes, and 8.7% ECs (Fig. 5A and Table S5). As expected, it was the least  
405 common in the non-COVID-19 tissue (Fig. 5B and S25). Its loading distributions in  
406 COVID-19 tissues were consistent with the lowest immune infiltration in tissue 1,  
407 followed by 4, 3, 2, and 5 (Fig. 5B and S25), closely corroborating the order of damage  
408 revealed by Signature 1. Trajectory analysis of the cell type compositions with  
409 Signatures 1 and 3 using *Slingshot* [64] defined a trajectory of reduced normal alveoli  
410 and increased immune infiltration from the non-COVID-19 tissue to tissue 1, 4, 3, 5, and

411 2 (Fig. 5C), which was in agreement with the order of their increased severity of  
412 pathology observed in H&E staining (Fig. S1). Remarkably, Signatures 4 to 7 captured  
413 four distinct types of immune microenvironments or niches in these COVID-19 tissues.  
414 Signature 4 was characterized by high ACs (64.8%) with MMs (27.3%), likely reflecting  
415 the infiltration of alveolar MMs and proliferation of ACs in wound healing, all of which  
416 are features of exudative DAD [65]. The relatively higher prevalence of Signature 4 in  
417 the less severe tissues 1 and 4 suggested its association with early phases of DAD (Fig.  
418 5B and S25). There were also overlaps in regions with higher loadings of Signature 4  
419 with the annotated regions of immune infiltration in the H&E image in tissue 4 (Fig. 5B  
420 and S1). Signatures 5 and 6 depicted inflammations around VECs, where Signature 5  
421 was associated with extensive infiltration of MMs (46.7%) and T cells (8.7%) around  
422 VEC (26.3%), whereas Signature 6 was associated with substantial infiltration of NK  
423 cells (31.8%) and granulocytes (13.6%) around VECs (27.6%) and ECs (12.2%). These  
424 results were consistent with the influx of MMs and NK cells (Fig. 1E and F), which was  
425 likely due to the activation of complement and coagulation systems (Fig. 2A and C),  
426 resulting in damages and therefore reduced numbers of ACs and VECs (Fig. 1E and F).  
427 Signature 5 was more common in the less severe tissues 1, 3 and 4 but Signature 6  
428 appeared predominantly in 3 (Fig. 5B and S25), particularly in low infection region (Fig.  
429 3A). Indeed, lymphocytic infiltrations were also identified in the regions associated with  
430 Signatures 5 and 6 (Fig. S1). Signature 7 denotes extremely high fibroblasts (73.4%)  
431 with infiltration of MMs (15.8%). Advanced disease in COVID-19 patients often has an  
432 excessive accumulation of fibroblasts and may develop pathological fibrosis due to  
433 chronic inflammation from the infiltrated immune cells and dysregulation of the



434 extracellular matrix triggered (ECM) remodeling [66]. As expected, there was a high  
435 correlation between the COL1A1 expression level (Fig. 4F) with Signature 7. The  
436 loadings of this signature were high in tissues 1 and 2, which were annotated as OP  
437 regions, and in tissue 5, which were annotated as fibrin and hyaline membrane in  
438 addition to OP regions (Fig. 5B, S1 and S25), suggesting a connection with OP, fibrin  
439 and hyaline membrane.

440

#### 441 **Unique cell composition signatures define two separate pathological trajectories.**

442 We then applied Signatures 4 to 7 to delineate the trajectories of DAD  
443 characterized by the immune responses against viral infection. We added Signature 1  
444 “normal-like alveoli” so that the non-COVID-19 tissue could be included as a reference.  
445 We used these 5 signatures to redefine the landscape of spatially resolved cell type  
446 compositions in these tissues. The UMAP visualization (Fig. 6A) recapitulated the tissue  
447 severity inferred by Signatures 1 and 3 (Fig. 5C) but presented more complex patterns,  
448 with each immune signature defining a largely distinct group of cell populations (Fig.  
449 6B). We applied *Slingshot* to infer pseudo-progressions of cells defined by these  
450 signatures and identified two trajectories (Fig. 6A). Clustering of cells based on pseudo-  
451 time values further segmented the trajectories into 6 stages (Fig. 6A). At the onset, the  
452 two trajectories shared a common path including stages T1 and most T2, which  
453 traversed the cells enriched by Signature 1 “normal-like alveoli” and Signature 4 “ACs  
454 with MMs infiltration” in T1 and then those enriched by Signature 4 and Signature 5  
455 “VECs with MMs infiltration” in T2 (Fig. 6A). These stages were consistent with the less  
456 damaged presentations of tissues 1 and 4 (Fig. 6D and S1) and showed a reduction of

457 ACs due to likely lung injury and an increase of MMs possibly promoted by innate  
458 immune responses (Fig. 6C). Inspecting associated tissue regions in the H&E images  
459 showed characteristics of early DAD manifested by shedding of ACs, capillary leakage,  
460 lymphocytic/immune infiltration, and yet preserved alveoli structure (Fig. 6D and E, T1  
461 and T2). After the shared section, the trajectories diverged into two paths. The first path  
462 (Trajectory A) included T3a and T4a and progressed through cells mostly from tissues 3  
463 and 4 enriched in Signature 5 “VEC with MMs infiltration” ending in Signature 6 “VEC  
464 with NK cell infiltration”, which was almost exclusively from tissue 3 (Fig. 6A, B and D).  
465 We observed a persistent decrease in ACs but an increase in VECs, NK cells and B  
466 cells (Fig. 6C). The H&E staining of tissue regions for T3a and T4a showed hyaline  
467 membrane, fibrin, lymphocytic infiltration, and collapsed alveoli and capillary structure  
468 (Fig. 6E, T3a and T4a, and S1). These features are consistent with a more advanced  
469 DAD. The close association of this path with tissues 3 and 4 suggested that they  
470 encompassed similar DAD-related tissue patterns and immune niches. Indeed, the  
471 postmortem report showed similar findings for these two patients including bilateral  
472 pulmonary consolidation [9].

473         The second path (Trajectory B) included two stages, i.e., T3b and T4b, which are  
474 enriched by Signature 6 in T3b and Signature 7 “high fibroblasts with MMs infiltration” in  
475 T4b highlighted by increased fibroblasts and immune infiltration of especially MMs (Fig.  
476 6A, B, and C). Their associated tissue regions were mostly in tissues 1, 2, and 5 (Fig.  
477 6D), suggesting potentially similar DAD tissue patterns and underlying immune niches  
478 in these tissues. The postmortem findings indeed revealed massive pulmonary emboli  
479 that were the main cause of death for cases 1 and 2 [9]. Close examination of these

480 regions in the H&E staining showed edema, increased fibrin, and OP (Fig. 6D, E, T3b  
481 and T4b, and S1), which are pathological signatures of DAD. There was a striking  
482 association between regions in tissues 1, 2 and 5 in T4b with the identified OP, fibrin  
483 and hyaline membrane regions and a significant positive correlation between the  
484 progression of Trajectory B and cell density (0.504, Spearman correlation,  $p$ -value <  
485 0.05) suggesting a more advanced stage of T4b than T3b with tissue 1 manifested in a  
486 more localized while tissues 2 and 5 in a more systematic manner. These results  
487 demonstrated a high degree of inter and intra-tissue heterogeneity in DAD-associated  
488 patterns. While tissue 1 contained regions affiliated with both trajectories, tissues 2 and  
489 5 were mostly associated with the trajectory featured by high fibroblasts and their  
490 reorganization, and tissues 3 and 4 were with the trajectory featured by increased VEC  
491 and immune infiltration.

492         Next, we investigated the genes whose expressions in a cell type were correlated  
493 with the trajectories. We found 53 and 67 genes significantly correlated with Trajectory  
494 A and B in at least one cell type, respectively (Spearman correlation,  $p$ -value<0.05,  
495 permutation test; Table S6). In both trajectories, we obtained a negative correlation for  
496 ACs marker SFTPC in ACs (Fig. S26A, S26B, Table S6, and Table S7), suggesting a  
497 decrease in its expression, which echoes the reductions in ACs in both trajectories (Fig.  
498 6C). We also found a positive correlation of NCAM1 in NK cells with Trajectory A and  
499 positive correlations of COL1A1 in Fibroblasts and C1QB in MMs with Trajectory B (Fig.  
500 S26A, S26B, Table S6, and Table S7), all of which were consistent with the observed  
501 changes of cell type compositions and DAD pathologies along the trajectories (Fig. 6C).

502 To gain further insight into potential ligand-receptor interactions that underlie the  
503 immune patterns associated with the trajectories, we correlated the ligand-receptor co-  
504 expressions with the trajectories. We found that CD40LG-CD40, CD80-CD28 and  
505 CXCL10-CXCR3 had the highest positive correlations with Trajectory A in all key cell  
506 types including especially VECs, ACs and Fibroblasts (Fig. S26C) while CD40LG-CD40,  
507 CSF3-CSF3R and CXCL10-CXCR3 were the top positive correlated pairs with  
508 Trajectory B in ACs, Fibroblasts, VECs and MMs (Fig. S26D). Thus, these ligand-  
509 receptor pairs might contribute to the chemoattraction of the immune cells as a result of  
510 SARS-CoV-2 infection.

511

512 **IL6-STAT3 and TGF- $\beta$ -SMAD2/3 pathways mediate COVID-19 lung fibrosis and**  
513 **organizing pneumonia.**

514 Because Trajectory B progressed into tissue regions that manifested extensive  
515 OP, we investigated the spatial patterns and molecular signatures associated with OP,  
516 which was mostly observed in tissues 1 and 2 and to a less extent in tissue 5, which  
517 also contained fibrin and hyaline membrane (Fig. 7A and S1). Analysis of cell  
518 compositions in regions with OP revealed an overall increase in cell density, and  
519 obvious decreases in cell numbers of ACs and VECs but an increase in cell numbers of  
520 fibroblasts compared to other regions in the same tissues and the non-COVID-19 tissue  
521 (Fig. 7B, C and D). As in the whole tissues, we observed downregulations of AGER,  
522 CAV1, SFTPA1, SFTPC, and A2M, and upregulation of IGKC in OP regions compared  
523 to the normal tissue (Fig. 7E). The changes of AGER, SFTPA1, SFTPC, and A2M were  
524 primarily observed in fibroblasts, MMs and VECs with downregulation of A2M also being

525 observed in ACs (Fig. 7F, G and H). The most striking observation is the upregulation of  
526 genes encoding for collagen type I alpha 1 and 2 chains (COL1A1 and COL1A2) in OP  
527 in both tissues compared to the normal tissue or to regions without OP in the same  
528 COVID-19 lung tissues (Figure 7E and G). Furthermore, both COL1A1 and COL1A2  
529 were upregulated in fibroblasts in OP regions compared to fibroblasts from either  
530 normal tissue or non-OP regions from the same tissue (Fig. 7G, H and I). COL1A1 and  
531 COL1A2 form the triple helix of a fibril-forming collagen, which is essential for lung  
532 homeostasis. Dysregulation of COL1A1 and COL1A2 leads to lung inflammation and  
533 fibrosis [67, 68]. Both COL1A1 and COL1A2 were mainly expressed in fibroblasts (Fig.  
534 7G and 7H), whose cell numbers were doubled in OP regions in both tissues compared  
535 to non-OP regions (Fig. 7D). Interestingly, the expression levels of COL1A1 and  
536 COL1A2 were highly heterogeneous in the individual cells in OP regions with extremely  
537 higher levels in 10-20% of the fibroblasts, which were absent in fibroblasts in non-OP  
538 regions or any other types of cells in the same COVID-19 tissues (Fig. 7J). COL1A1 and  
539 COL1A2 were not expressed in high levels in any types of cells in normal lung tissue  
540 (Fig. 7J). These results indicated that COVID-19 OP regions had severe dysregulation  
541 of fibroblasts with upregulation of COL1A1 and COL1A2, and abnormal ACs and VECs  
542 as a result of downregulation of AGER, SFTPA1, and SFTPC.

543 To further confirm that increased expressions of COL1A1 and COL1A2 were  
544 hallmarks of COVID-19 OP, we examined their expressions in different cell types in  
545 single-cell RNA-seq (scRNA-seq) data from COVID-19 lung tissues [4]. Consistent with  
546 our observation, we found that COL1A1 and COL1A2 expressed mainly in fibroblasts  
547 and also showed varying expression levels (Fig. S27A). Specifically, they showed a

548 higher expression level in a subset of fibroblasts enriched with myofibroblasts ( $p <$   
549 0.001, Gene Set Enrichment Analysis (GSEA): Fig. S27A and B). Myofibroblasts are  
550 differentiated fibroblasts, whose dysregulation may lead to idiopathic pulmonary fibrosis  
551 (IPF) including COVID-19 lung fibrosis, a lung disease that exhibits OP [69-71]. To  
552 provide a linkage between the OP regions and IPF, we examined the scRNA-seq data  
553 from lung tissue patients with IPF and nonfibrotic controls [72]. Like in the COVID-19  
554 data, we observed a subpopulation of fibroblasts with high expressions of COL1A1 and  
555 COL1A2 (Fig. S27C) and they were also enriched in myofibroblasts ( $p$ -values $<0.001$ ,  
556 GSEA; Fig. S27D). We further examined the differentially expressed genes in IPF  
557 fibroblast cells with high COL1A1 and COL1A2 expressions vs. fibroblast cells with low  
558 COL1A1 and COL1A2 expressions or nonfibrotic cells, respectively (Fig. S27E and  
559 S27F). The two lists of significant differentially expressed genes (DEGs) were similar ( $p$ -  
560 values $<0.001$ , GSEA; Fig. S27G), suggesting that the subpopulation with low COL1A1  
561 and COL1A2 expressions could serve as normal control. As a result, we compared the  
562 fibroblasts with a high vs. low COL1A1 and COL1A2 expressions in the COVID-19  
563 scRNA-seq data and obtained the DEGs (Fig. S27H). These DEGs are enriched by two  
564 DEG lists in IPF fibroblasts with high COL1A1 and COL1A2 expressions ( $p < 0.001$ ,  
565 GSEA; Fig. S27I and S27J), suggesting that these cells likely had similar molecular  
566 characteristics as those in IPF. Indeed, functional enrichment analysis using the  
567 Ingenuity Pathway Analysis reported “Pulmonary Fibrosis Idiopathic Signaling  
568 Pathways” as the 2<sup>nd</sup> top-ranked pathway (Fig. S27K). Several other top enriched  
569 pathways related to extracellular matrix remodeling were also identified. Examination of  
570 the networks of these pathways identified IL6-STAT3 and TGF- $\beta$ -SMAD2/3 pathways

571 that could directly regulate the expressions of COL1A1 and COL1A2 (Fig. 7K). Multi-  
572 color indirect immunofluorescence antibody assay (IFA) staining indeed revealed that  
573 cells with a high COL1A1 expression level also had high levels of IL6 receptor-  
574  $\alpha$  (IL6R $\alpha$ ), phospho-STAT3 (p-STAT3), TGF- $\beta$ R2 and phospho-SMAD2/3 (p-SMAD2/3),  
575 confirming the activation of these pathways and their potential roles in the upregulation  
576 of COL1A1 (Fig. 7L). Both IL6 and TGF- $\beta$  are highly induced, and implicated in fibrosis  
577 and lung injury [73, 74] as well as upregulation of COL1A1 and other extracellular matrix  
578 proteins in COVID-19 lung tissues [75, 76]. These results demonstrated the important  
579 roles of IL6 and TGF- $\beta$  in the induction of severe COVID-19 lung OP and fibrosis.

580

## 581 **Discussion**

582 Using *in-situ* sequencing and our spatial single-cell analysis pipeline, we have  
583 painted an atlas of cellular and molecular signatures of lung tissues from severe  
584 COVID-19 cases. The atlas describes the cellular heterogeneity, organization, and  
585 interactions associated with inflammation, damage, and immune responses in COVID-  
586 19 tissues. It provides molecular and cellular insights into the mechanisms underlying  
587 SARS-CoV-2 infection and the pathological manifestations in COVID-19 lungs.

588 We detected a total of 10,414,863 transcripts in five COVID-19 and one non-  
589 COVID-19 lung tissues. Spatial single-cell transcriptomics analysis at this scale for  
590 COVID-19 and other pathological conditions is still very limited. We have overcome  
591 considerable challenges and developed a pipeline of robust, scalable, interpretable  
592 computational tools and visualization methods for targeted and exploratory analyses  
593 emphasizing on spatial discovery. The first critical component of this pipeline is a

594 transcript-based cell segmentation strategy that integrates cell nuclei in the matching  
595 DAPI staining identified by *CellPose* with spatially localized reads using *Baysor* and  
596 iteratively segments reads into cells of potentially different sizes [10, 77]. Using this  
597 strategy, we segmented 93% of total transcripts into 1,719,459 cells including 186,659  
598 to 470,294 cells for different tissues. A customized filter was further applied to retain  
599 only a subset of high-quality cells.

600 Cell typing of these filtered cells based on marker genes showed that SARS-  
601 CoV-2 infected all the 18 identified cell types, a result consistent with those of our  
602 previous study [9] and others [4]. However, only a small fraction of these cells (<5%) are  
603 infected. These results agree with those of genome-wide studies that detected small  
604 numbers of viral reads in blood, lung, and nasopharyngeal samples from severe  
605 COVID-19 patients [4, 78-81]. Despite the detected low infection rates, SARS-CoV-2  
606 inflicts similar effects on the infected and uninfected cells across the tissues as shown  
607 by differential expression analysis of genes in infected or uninfected cells in COVID-19  
608 tissues against cells in the non-COVID-19 lung tissue (Fig. 2A). Thus, indirect effects  
609 such as those induced by the immune response, inflammation, cytokines, and  
610 complement activation might play a significant role on lung pathology in COVID-19  
611 patients. In fact, we have observed vast pulmonary microthrombi, thrombosis, and  
612 immune infiltrations in these COVID-19 lung tissues (Fig. S1). The major parenchymal  
613 cells including ACs, fibroblasts, and VECs have the highest numbers of infected cells.  
614 The COVID-19 lung tissues have reduced numbers of ACs and SMCs, but an increased  
615 number of ECs accompanied by vast immune infiltrations of innate immune cells



616 including MMs, granulocytes, and NK cells, and adaptive immune cells including T and  
617 B cells.

618         Despite these global and consistent impacts of SARS-CoV-2 infection on the  
619 lungs, there are extensive spatial heterogeneities in addition to varying cell type  
620 percentages across the tissues. To reveal spatial dynamics of cellular features  
621 presented in considerable spatial discontinuity due to sparse measurements, we  
622 adopted a strategy to compute local feature distributions in the neighboring region of the  
623 cell with a fixed radius or cell number. This approach assesses the spatial gene  
624 expression maps, local infection rates, cell densities, and co-expression maps of ligand-  
625 receptor pairs. To further characterize spatial patterns of an individual feature or joint  
626 pattern relationship between two features, we extensively applied the Moran's I  
627 statistics, a method widely adopted in geoscience but scarcely in spatial transcriptomics  
628 analysis. Using these novel strategies, we identified regions with high infection rates,  
629 which are found in regions with high cell densities expressing higher levels of SARS-  
630 CoV-2 entry-related factors including ACE2, FURIN, TMPRSS2, and NRP1. Thus,  
631 SARS-CoV-2 may preferentially infect cells expressing these factors and the infected  
632 cells could also aggregate to these high-density regions following infection. Importantly,  
633 these regions are mapped to OP (tissues 1 and 2) or regions with fibrin, hyaline  
634 membrane, and edema (tissues 3, 4, and 5), and manifest cellular and molecular  
635 patterns resembling tissue damage and wound healing including infiltration of immune  
636 cells and pattern of fibrosis. We have found that OP harbors high densities of fibroblasts  
637 expressing high levels of COL1A1 and COL1A2, a phenomenon common in fibrosis and  
638 wound healing, which are unique to OP regions unseen in other regions of COVID-19

639 lung tissues or in the non-COVID-19 tissue. We have identified similar cell populations  
640 enriched by myofibroblasts in 10X scRNA-seq data from COVID-19 lung samples and  
641 IPF samples, suggesting that SARS-CoV-2 might preferentially infect myofibroblasts or  
642 reprogram other cell type(s) into myofibroblasts. Pathway enrichment analysis revealed  
643 the enrichment of multiple pathways related to IPF signaling and extracellular matrix  
644 remodeling including IL6-STAT3 and TGF- $\beta$ -SMAD2/3 pathways. Indeed, we have  
645 detected high levels of IL6Ra, p-STAT3, TGF- $\beta$ R2, and p-SMAD2/3 in cells expressing  
646 myofibroblast markers in OP regions. These results suggest that SARS-CoV-2 infection  
647 might induce aggregation of fibroblasts, and IL6 and TGF- $\beta$  to promote wound healing  
648 in OP regions.

649         To define spatial patterns associated with COVID-19 lung pathology, we  
650 performed the NCTC analysis, or the niche analysis, commonly used for probing  
651 interactions of cells such as in immune microenvironments. However, the COVID-19  
652 tissues contain complex pathology manifestations resulting in highly heterogenous  
653 cellular organizations and thus disparate NCTC patterns. To tackle this challenge, we  
654 applied SNMF, owing to its scalability and interpretability, to NCTCs of all cells in six  
655 tissues to reveal potentially latent features underlying these seemingly less organized  
656 NCTCs. We indeed identified 7 latent signatures of spatial cell type compositions that  
657 define normal lung structures and SARS-CoV-2 infection-induced immune niches. While  
658 many existing studies have revealed the global immune landscape of SARS-CoV-2  
659 infection [1, 2, 5], few report spatial signatures of immune niches. We showed that these  
660 niches are mostly tissue-independent, but COVID-19 tissues presented heterogeneous  
661 distributions of these niches: while tissues 1, 2, 4, and 5 contain multiple types of

662 niches, tissue 3 has predominately a single type. We further drew the connections  
663 between these niches and different stages of DAD. Such a linkage prompted us to apply  
664 the trajectory analysis to NCTCs of these signatures. While the trajectory analysis is  
665 most commonly applied to gene expressions to predict a pseudo-progression of the  
666 cells, here, this innovative use of trajectory analysis defined the relative severities of  
667 damages among COVID-19 tissues and constructed two different pathological routes of  
668 progression in COVID-19 patients. Both routes start with enriched “ACs with MM  
669 infiltration” and “VECs with MMs infiltration” niches but Route A is marked by increased  
670 numbers of NK cells and granulocytes, likely reflecting complications of microbial  
671 infections, while Route B is characterized by increased HIHD and OP, marked by  
672 increased fibrosis. Both routes are also correlated with multiple cytokine-cytokine  
673 receptor pairs such as CD40LG-CD40 and CXCL10-CXCR3 that are likely to mediate  
674 the chemoattraction of the immune cells (Fig. S26C and S26D). By mapping these  
675 routes to individual cells, we further revealed considerable inter and intra-tissue  
676 heterogeneity in the inferred progression of COVID-19 pathology with tissue 3 and 4  
677 associated with Route A, tissue 2 and 5 with Route B, and tissue 1 with both routes.

678         In summary, we have presented an atlas of spatial patterns of different cellular  
679 features that characterize SARS-CoV-2 infection, its induced immune infiltrations,  
680 inflammation, and damages in severe COVID-19 lungs, in addition to changes in gene  
681 expression in multiple cell types, including immune cells and lung parenchymal cells.  
682 These results provide insights into the spatial mechanisms at both molecular and  
683 cellular levels, which characterize the development of ARDS in COVID-19 patients.  
684 Overall, this study demonstrates the power of spatial single-cell transcriptomics and

685 enables spatial computational analyses in the study of COVID-19 lung pathology. The  
686 developed innovative methods can benefit spatial single-cell analyses for other healthy  
687 and diseased conditions.

688

## 689 **Methods**

### 690 **Lung tissue samples**

691 COVID-19 lung tissues were collected from 5 adults with fatal SARS-CoV-2  
692 infection by the Autopsy Service of the Department of Pathology, Molecular and Cell-  
693 Based Medicine at the Icahn School of Medicine at Mount Sinai, and non-COVID-19  
694 lung tissue was obtained from Pitt Biospecimen Core [9].

695

### 696 **Study approval**

697 Specimens obtained at autopsy do not meet the definition of a living individual  
698 per Federal Regulations 45 CFR 46.102, and as such, research using specimens  
699 obtained at autopsy does not meet the requirements for Institutional Review Board  
700 (IRB) review or oversight under the Icahn School of Medicine Program for the Protection  
701 of Human Subjects. The University of Pittsburgh IRB determined that the study is not  
702 research involving human subjects as defined by DHHS and FDA regulations and  
703 waived of ethical oversight (STUDY20050085).

704

### 705 **In-situ sequencing (ISS)**

706 HS Library Preparation kit (P/N 1110-02, CARTANA AB, part of 10x Genomics)  
707 was used to prepare the library according to the manufacturer's instruction with minor

708 modification [82]. Four  $\mu\text{m}$  FFPE tissue sections were baked for 1 hour at 60°C and  
709 deparaffinized by incubating in xylene twice for 7 minutes (min) each. The sections were  
710 then rehydrated by incubating in 100% ethanol (EtOH) for 5 min, followed by 70% EtOH  
711 for 5 min, and nuclease-free deionized distilled water (SH30538.02, HyClone) for 2 min.  
712 Sections were then permeabilized by incubating in citrate buffer pH 6.0 (C9999, Sigma  
713 Aldrich) for 3 hours at 95°C. Chimeric padlock probes (from 1 custom panel (Table S1)  
714 and 4 pre-designed panels: hImmune I1A, hImmune I3D, hLung L1C, hLung L2E,  
715 CARTANA AB) directly targeting RNA and containing an anchor sequence as well as a  
716 gene-specific barcode were hybridized overnight at 37°C, then ligated overnight at  
717 30°C. Quality control of the library preparation was performed by applying anchor  
718 probes which labeled by Cy5 to simultaneously detect all rolling circle amplification  
719 products from all genes in the panel. All incubations were performed in SecureSeal™  
720 hybridization chambers (621502, Grace Biolabs). Slow Fade Antifade Mountant  
721 (S36936, ThermoFisher) was used for mounting. All samples passed the quality control  
722 and were sent to CARTANA AB (part of 10x Genomics) for *in-situ* barcode sequencing,  
723 imaging, and data processing. Briefly, the fluorescent signals for quality control were  
724 stripped. Adapter probe pool 1 and a sequencing pool containing 4 different fluorescent  
725 labels were hybridized to the *in-situ* libraries to detect gene-specific barcodes. The  
726 scanning was fulfilled by using epifluorescence microscopy, and raw data consisting of  
727 20x magnification images from 5 fluorescent channels (DAPI, Alexa Fluor® 488, Cy3,  
728 Cy5 and Alexa Fluor® 750) and individual z-stacks, were flattened to 2D using  
729 maximum intensity projection with a Nikon Ti2 Microscope (software NIS elements)  
730 utilizing a Zyla 4.2 camera. In total, 6 sequencing cycles were achieved for full decoding

731 of all designed genes. After image processing, which includes image stitching,  
732 background filtering, and a sub-pixel object registration algorithm, true signals were  
733 scored based on signal intensities from individual multicolor images. The results were  
734 summarized in a CSV file and gene plots were generated using MATLAB. Each ISS  
735 spot provided a unique fluorescent barcode identifying the targeted RNA of a gene  
736 marker. The experiment generated a map of gene expressions of selected genes  
737 recorded on the natural morphology of the tissue at a single-cell level. The metadata  
738 generated from the images were further analyzed to obtain data containing the reads  
739 and their 2D (X, Y) positions of each gene, and the DAPI images. TissuuMaps [83, 84]  
740 was used to visualize spatial read locations of multiple genes against DAPI or histology  
741 images.

742

#### 743 **Hematoxylin-eosin staining (H&E) and whole slide scanning**

744 H&E was carried out with the same slides subjected to *in-situ* sequencing using  
745 Hematoxylin & Eosin Stain Kit (H-3502, Vector Laboratories) according to the  
746 manufacturer's instructions. The slides were then scanned with VS200 Slide Scanner  
747 (Olympus).

748

#### 749 **Indirect immunofluorescence antibody assay (IFA)**

750 IFA was carried out as previously described [9]. Primary antibodies included  
751 CoraLite® Plus 647-conjugated smooth muscle actin (1:200, Proteintech, CL647-  
752 67735), CoraLite® Plus 488-conjugated Collagen Type I (1:100, Proteintech, CL488-  
753 67288), IL6R $\alpha$  (1:500, Proteintech, 23457-1-AP), p-STAT3 (Tyr705) (1 to 20, Invitrogen,

754 710093), p-SMAD2/3 (p-SMAD2-S465/467 and p-SMAD3-S423/425, 1:500, ABclonal,  
755 AP0548), and TGF- $\beta$ RII (1:10, R&D Systems, AF-241-NA). Secondary antibodies  
756 included Goat anti-Rabbit IgG (H+L) Highly Cross-Adsorbed Secondary Antibody, Alexa  
757 Fluor™ Plus 555 (1:400, Invitrogen, A32732), Donkey anti-Mouse IgG (H+L) Highly  
758 Cross-Adsorbed Secondary Antibody, Alexa Fluor™ 568 (1:400, Invitrogen, A10037).

759

## 760 **Cell segmentation**

761 Reads in a tissue sample were segmented into corresponding cells using the  
762 Baysor cell segmentation algorithm [10]. Baysor applies a Markov Random Field model  
763 to identify spatial clustering of reads from the same cell. It can perform cell  
764 segmentation based on read coordinates alone but can also incorporate nuclear  
765 information from DAPI staining. We first utilized the DAPI-stained images of the tissues  
766 and performed the nuclei segmentation using the *CellPose* anatomical segmentation  
767 algorithm with the default setting of parameters [77]. Segmented nuclei masks with  
768 locations were provided to Baysor to define its scale and standard deviation  
769 parameters. Baysor was able to segment 71%- 91% of reads after the first run for all  
770 samples/tissues. However, we found that among the unsegmented, the so-called noisy  
771 background reads determined by Baysor, there is a considerable portion that could still  
772 be assigned to cells visually. To address this issue, we applied Baysor again to these  
773 noisy reads from the first Baysor run. We optimized the scale and standard deviation  
774 parameter for the second Baysor run to maximize reads assignment to cells. Including  
775 the second run significantly improved the percentages of the segmented reads to 88%-

776 95% for all samples/tissues (Fig. S3, S4 and Table S2). We implemented only two runs  
777 because the remaining unsegmented reads were mostly noisy background reads.

778

### 779 **Normalization and filtering**

780 Segmented gene reads assigned to cells were then filtered using multiple criteria.  
781 First, we removed cells that did not contain reads from any marker genes. Second, we  
782 removed cells with total read counts <5 or less than 4 genes with reads. Of the  
783 remaining cells, read counts for each gene within a cell were tallied and gene  
784 expressions were normalized using the *scTransform* algorithm [11] to further remove  
785 biases due to technical variability. The normalized expressions of 220 genes were used  
786 for subsequent analysis.

787

### 788 **Cell typing**

789 We determined the cell type of each cell using an in-house curated list of marker  
790 genes for 18 cell types (Table S1). For each cell, we calculated the average expression  
791 of marker genes for each of the 18 cell types and then assigned the cell type with the  
792 highest average expression to this cell. We further annotated infected cells as those  
793 with at least one SARS-CoV-2 read. We used UMAP to visualize the expression pattern  
794 of cells associated with the identified cell types in a lower dimension by using the  
795 visualization pipeline in the Seurat package [85].

796

### 797 **Image registration**



798           The DAPI images of tissues that were used as a prior for cell segmentation had  
799 translational and rotational differences with their corresponding H&E stained images.  
800 For single-cell resolution datasets, small spatial geometric changes in the available raw  
801 morphology images could have dramatic differences in downstream analysis for  
802 studying the pathology signatures using annotated regions in the H&E image. To  
803 mitigate these spatial geometric differences, we registered the DAPI and H&E images  
804 by maximizing the phase correlation between both images. Here, we selected the DAPI  
805 image as a fixed reference because we used DAPI images as references for reads  
806 mapping and cell segmentation. To register both images, the H&E stained image is  
807 transformed by changing the scale, rotation, and translation parameters and moved  
808 across the DAPI image to improve the phase correlation of both 2D images. Once a  
809 peak correlation value was found, the optimization algorithm returned the 2D geometric  
810 transformations required to warp the H&E-stained image and registered it to the  
811 corresponding DAPI image. We applied the same image registration algorithm to all six  
812 samples used in this study. Pathology annotations were carried out on the registered  
813 H&E images.

814

### 815 **Cell density analysis**

816           The abundance of cells relative to the tissue context could reveal biology related  
817 to cell proliferation, cell damage, as well as other pathologies related to infection. In our  
818 spatial analysis pipeline (Fig. 1B), we defined cell density based on the number of cells  
819 within a neighborhood of a fixed radius of 200 units ( $200 \times 0.32 \mu\text{m}/\text{unit} = 64 \mu\text{m}$ )  
820 centering a cell, covering an area of  $0.013 \text{ mm}^2$ . By calculating the number of cells

821 within the fixed neighborhoods of each cell, we summarized the global cell density  
822 patterns across the tissue. We further presented the cell density as a contour plot by  
823 fitting a 2D kernel density estimator (KDE) on the cell density feature (Fig. 3).

824

### 825 **Neighboring cell type composition analysis**

826 Local cell type distributions can reveal tissue structures and different COVID-19  
827 pathology. We assessed the local cell type distribution by computing the neighboring  
828 cell type composition (NCTC) of each cell. NCTC defined a cellular neighborhood of 200  
829 cells and counts the number of different cell types in the neighborhood to create a  
830 neighborhood count vector for each cell. This neighborhood count vector was  
831 normalized to obtain the percentages of cell types. NCTC summarized the distributions  
832 of each cell type in the vicinity of a cell and was further used to analyze the spatial  
833 correlation of different cell types in a region-of-interest (ROI), study spatial gene  
834 expression patterns of local neighborhoods, identify local hotspots of individual cell  
835 types, and more. Furthermore, the neighborhood composition of individual cell types is  
836 spatially mapped by painting the neighborhood count/percentage of the selected cell  
837 type with a continuous “rainbow” color scheme where deeper violet to deeper reds  
838 indicates a range of low-to-high neighborhood cell composition (Fig. S10-S15).

839

### 840 **Spatial gene expression map**

841 SSCT captures gene expression of single cells in the context of intact tissue  
842 structures. In our study, we investigated the spatial organization of cells in tissue and  
843 their gene expression by studying their spatial gene expression maps (SGM). For each

844 gene, its SGM is defined as the sum of the expression of that gene in its 200 nearest  
845 neighboring cells. Thus, SGM represents a spatial gradient by summarizing the regions  
846 with high or low gene expression patterns. We then painted the SGM using the  
847 continuous rainbow colormap similar to the NCTC analysis, generating the spatial gene  
848 expression maps illustrated in Fig. 2B, 2C, and 4F. By comparing the SGM with  
849 available pathology annotations, pathology signatures with relevant expression patterns  
850 can be localized to specific spatial regions in the tissue. Additionally, novel pathology  
851 signatures or ROIs can be discovered using the proposed SGM analysis.

852

### 853 **Local infection rate analysis**

854 We used the local infection rate analysis to study the spatial distribution of  
855 SARS-Cov-2 infection. It was similar to the NCTC analysis and computed the  
856 percentage of infected cells in a fixed physical area of 1.286 mm<sup>2</sup> or a radius of 2,000  
857 units (640 μm) around each cell across the tissue. These spatial rates can be further  
858 visualized using the same rainbow color scheme as NCTC (Fig. 3A).

859

### 860 **Ligand-receptor coexpression map**

861 Ligand-receptor interactions among cells in a defined location can define spatial  
862 patterns of immune microenvironments due to SARS-CoV-2 infection. To infer the  
863 interactions, we examine the spatial co-expression between a ligand-receptor pair.  
864 Inspired by Moran's I spatial cross-correlation, we computed the spatial coexpression  
865 between ligand  $x$  and receptor  $y$  for cell  $i$  as

866

$$E_i = x_i \sum_{j \in \mathcal{N}_i} y_j$$

867 where  $x_i = 1$  ( $y_j = 1$ ) if ligand  $x$  (receptor  $y$ ) expressed in cell  $i$  ( $j$ ) and 0, otherwise and  
868  $\mathcal{N}_i$  defines a set of neighboring cells of cell  $i$ , which are cells within a radius of 1,000  
869 units (320  $\mu\text{m}$ ) or a fixed physical area of 0.322  $\text{mm}^2$  around cell  $i$ . Then, we visualized  
870 the coexpression in a tissue using a fixed monochrome color scheme (Fig 3F).

871

## 872 **Moran's I analysis of spatial patterns**

873 Spatial global autocorrelation of one variable or more variables can be  
874 summarized using Moran's I score. However, calculating the global spatial  
875 autocorrelation using Moran's I across the whole tissue assumes homogeneity of the  
876 studied variable and yields only one statistic that summarizes the complete spatial  
877 pattern across the tissue disregarding their difference over space. Since our SARS-  
878 CoV-2 infected tissue samples show spatial heterogeneity, in this study, we used Local  
879 Indicators of Spatial Association (LISA) [86] to evaluate the spatial autocorrelation and  
880 the statistical significance of a study variable in each location using Local Moran's I.

881 Consider  $x_i$  as, e.g., the neighboring infection rate of a cell at location  $i$ , the  
882 univariate spatial autocorrelation can be found as the degree of linear association  
883 between  $x_i$  and a weighted average of the neighboring cells  $x_j$ , based on a spatial  
884 weight  $w_{ij}$  between cells at location  $i$  and  $j$ . Thus, formally, Moran's I for each location  $i$   
885 is given by

$$886 \quad I_i = \frac{x_i - \bar{x}}{m_2} \sum_{j=1}^N w_{ij} (x_j - \bar{x})$$

887 where  $N$  defines the number of cells,  $\bar{x}$  defines the mean of all the cells, and  $m_2$  is given  
888 by

889 
$$m_2 = \frac{\sum_{i=1}^N (x_i - \bar{x})^2}{N}$$

890  $I_i$  ranges from -1 to 1 with -1 indicating highly negative and +1 indicating highly positive  
 891 spatial autocorrelation. Such formulation can be used to identify spatial regions with  
 892 high or low autocorrelation. For example, in Fig. 3B, we identified regions with high and  
 893 low infection rates in each tissue.

894 Under the same formulation, bivariate spatial autocorrelation can be used to  
 895 assess spatial cross-correlation of a feature  $x_i$ , e.g., the neighboring infection rate of a  
 896 cell at location  $i$  and another feature  $y_j$ , e.g., the cell density of a neighboring cell  $j$  as

897 
$$I_i = \frac{x_i - \bar{x}}{m_2} \sum_{j=1}^N w_{ij} (y_j - \bar{y})$$

898 where  $I_i$  defines the degree of linear association between the neighboring infection rate  
 899 of a cell at location  $i$  and a weighted average of the cell density of the neighboring cells.  
 900 Bivariate spatial associations can uncover cross-correlations between any such variable  
 901  $x$  at location  $i$  and another variable  $y$  at neighboring locations by ignoring correlations  
 902 between  $x$  and  $y$  for cases where  $i = j$ . In our study, the bivariate LISA method is used  
 903 to calculate the Local Moran's I to identify HIHD regions described in Fig. 3E.

904

905 **Sparse Non-negative matrix factorization (SNMF) of neighboring cell type**  
 906 **compositions**

907 SNMF was applied to extract interpretable, tissue-specific, and tissue-  
 908 independent signatures from NCTC vectors from all tissue samples [63]. Let  $A \in$   
 909  $(\mathbf{0}, \mathbf{1})^{N \times M}$  represent the NCTC matrix of  $N$  cell types and  $M$  cells and it is factored as

910

911 
$$A \approx SDH$$

912

913 where  $S \in (0, 1)^{N \times K}$  is the matrix of  $K$  NCTC signatures with each column denoting a  
914 signature,  $H \in (0, 1)^{K \times M}$  is the signature loading matrix with  $m$ th column denoting the  
915 contributions of each signature to the NCTC vector of cell  $m$ , and  $D \in \mathbb{R}^{K \times K}$  is a scaling  
916 matrix.

917 R package *RcppML* was used for the SNMF analysis [63], which implemented  
918 an alternating least squares (ALS) algorithm to minimize the mean squared error (MSE)  
919 between  $A$  and  $SDH$ .  $L_1$  regularization was introduced to promote a compact, sparse  
920 signature loading.

921 Determining the best number of signatures  $K$  is important for uncovering  
922 meaningful signatures. While an underestimated number could miss critical signatures,  
923 an overestimated number would include many noisy signatures. To this end, we  
924 evaluated different maximum numbers of factors from 4 to 12 and examined the  
925 meaning regarding its cell type composition and spatial distributions of loadings of each  
926 signature and chose  $K = 7$  for the SNMF analysis.

927

## 928 **Trajectory analysis**

929 The goal of trajectory analysis is to infer a progression or ‘pseudotime’ of  
930 infection severity and associated tissue damages based on NCTC patterns in all  
931 tissues. We applied the trajectory analysis to uncover the pseudotime of 1) infection  
932 severity among tissues and 2) tissue damage defined by immune microenvironments.  
933 For 1), we used loadings of Signature 1 “Normal-like Alveoli” and Signature 3 “Broad

934 Immune Infiltration” obtained from SNMF and defined tissue samples as clusters. For  
935 2), we used the loadings of Signature 1 and four immune microenvironment-related  
936 signatures, *i.e.*, Signature 4-7, and performed Louvain clustering to define the clusters.  
937 The R package *Slingshot* was used to infer the trajectory [64]. The loadings, clusters,  
938 and the signatures or the 2-D UMAP matrix were fed into *Slingshot* to obtain so-called  
939 ‘pseudotime’ scores for each cell. For both cases, the cluster enriched by cells from the  
940 non-infected tissue (PBC-PR) cells was set as the origin.

941 The pseudotime scores of the cells in each trajectory can correlate with gene  
942 expression to uncover genes that correlate with tissue damage. Additionally, ligand-  
943 receptor coexpressions that correlate with each trajectory could inform potential ligand-  
944 receptor interactions that govern immune responses. To this end, we computed the  
945 Spearman correlation of the pseudotime score with the expression of each gene per cell  
946 type in each trajectory. We also computed the correlation of ligand-receptor  
947 coexpressions with the pseudotime score of each trajectory. In both cases, to properly  
948 assess *p-values*, we performed a permutation test to obtain the empirical null  
949 distribution of the correlation coefficients and chose *p-value*<0.5 as the significant level.  
950 We then plotted heatmaps to illustrate the cell-type-wise correlations of the genes in  
951 each trajectory (Fig. S26A-D).

952

### 953 **Publicly available scRNA-seq datasets**

954 Two scRNA-seq datasets were obtained and processed as follows.

- 955 1. COVID-19 scRNA-seq dataset [4]. The dataset (SCP1052, lung.h5ad.gz) was  
956 downloaded from the Single Cell Portal

957 ([https://singlecell.broadinstitute.org/single\\_cell](https://singlecell.broadinstitute.org/single_cell)). The processed data file  
958 lung.h5ad was accessed using the Python package Scanpy (Scanpy 1.9.1).  
959 UMAP coordinates for the processed data were accessed from the file  
960 upload.scp.X\_umap.coords.txt. No follow-up processing was performed on the  
961 processed *anndata* object after it was loaded into Scanpy.

962 2. IPF scRNA-seq dataset [72]. The dataset (GSE135893,  
963 GSE135893\_ILD\_annotated\_fullsize.rds.gz) was downloaded from Gene  
964 Expression Omnibus (GEO). The Seurat object file was converted into the h5ad  
965 file format using the SeuratData package (Seurat 4.3.0, SeuratData 0.2.2). After  
966 conversion, the data was loaded in Scanpy (Scanpy 1.9.1) and all cells not  
967 originating from an IPF sample or control sample were removed.

968

## 969 **Statistics and reproducibility**

970 Reads-based cell segmentation was performed using *Baysor* (version 0.5.2).  
971 Nuclei segmentation from DAPI images was performed using *CellPose* (version 2.1.1).  
972 All other image analyses including imaging registration were performed using MATLAB  
973 (version 2022a). Unless otherwise specified,  $p$ -value  $< 0.05$  was considered significant.  
974 The differential expression analysis was performed in R (version 3.6.3) using the  
975 Wilcoxon rank-sum test with Bonferroni's correction of multiple testing as necessary.  
976 The Moran's I analyses for spatial patterns were performed using GeoDa (version 1.20).  
977 Pearson correlation coefficients were calculated using function *pearsonr* in Python  
978 Scipy (version 1.9.3). UMAP dimension reduction and visualization were performed



979 using function *DimPlot* in Seurat (version 4.2.0). Trajectory analyses were performed

980 using R package *Slingshot* (version 2.6.0).

981

982 **Reference**

- 983 1. Ren, X., et al., *COVID-19 immune features revealed by a large-scale single-cell*  
984 *transcriptome atlas*. Cell, 2021. **184**(23): p. 5838.
- 985 2. Melms, J.C., et al., *A molecular single-cell lung atlas of lethal COVID-19*. Nature,  
986 2021. **595**(7865): p. 114-119.
- 987 3. Wilk, A.J., et al., *A single-cell atlas of the peripheral immune response in patients*  
988 *with severe COVID-19*. Nat Med, 2020. **26**(7): p. 1070-1076.
- 989 4. Delorey, T.M., et al., *COVID-19 tissue atlases reveal SARS-CoV-2 pathology and*  
990 *cellular targets*. Nature, 2021. **595**(7865): p. 107-113.
- 991 5. Stephenson, E., et al., *Single-cell multi-omics analysis of the immune response*  
992 *in COVID-19*. Nat Med, 2021. **27**(5): p. 904-916.
- 993 6. Erjefalt, J.S., et al., *Diffuse alveolar damage patterns reflect the immunological*  
994 *and molecular heterogeneity in fatal COVID-19*. EBioMedicine, 2022. **83**: p.  
995 104229.
- 996 7. Asp, M., J. Bergenstrahle, and J. Lundeberg, *Spatially Resolved Transcriptomes-*  
997 *Next Generation Tools for Tissue Exploration*. Bioessays, 2020. **42**(10): p.  
998 e1900221.
- 999 8. Larsson, L., J. Frisen, and J. Lundeberg, *Spatially resolved transcriptomics adds*  
1000 *a new dimension to genomics*. Nat Methods, 2021. **18**(1): p. 15-18.
- 1001 9. Ramos da Silva, S., et al., *Broad Severe Acute Respiratory Syndrome*  
1002 *Coronavirus 2 Cell Tropism and Immunopathology in Lung Tissues From Fatal*  
1003 *Coronavirus Disease 2019*. J Infect Dis, 2021. **223**(11): p. 1842-1854.
- 1004 10. Petukhov, V., et al., *Cell segmentation in imaging-based spatial transcriptomics*.  
1005 Nat Biotechnol, 2022. **40**(3): p. 345-354.
- 1006 11. Hafemeister, C. and R. Satija, *Normalization and variance stabilization of single-*  
1007 *cell RNA-seq data using regularized negative binomial regression*. Genome Biol,  
1008 2019. **20**(1): p. 296.
- 1009 12. Arish, M., et al., *COVID-19 immunopathology: From acute diseases to chronic*  
1010 *sequelae*. J Med Virol, 2022. **95**(1): p. e28122.
- 1011 13. Whitsett, J.A., S.E. Wert, and T.E. Weaver, *Alveolar surfactant homeostasis and*  
1012 *the pathogenesis of pulmonary disease*. Annu Rev Med, 2010. **61**: p. 105-19.
- 1013 14. Lin, Z., et al., *Genetic Association of Pulmonary Surfactant Protein Genes,*  
1014 *SFTPA1, SFTPA2, SFTPB, SFTPC, and SFTPD With Cystic Fibrosis*. Front  
1015 Immunol, 2018. **9**: p. 2256.
- 1016 15. Floros, J., et al., *Human Surfactant Protein SP-A1 and SP-A2 Variants*  
1017 *Differentially Affect the Alveolar Microenvironment, Surfactant Structure,*  
1018 *Regulation and Function of the Alveolar Macrophage, and Animal and Human*  
1019 *Survival Under Various Conditions*. Front Immunol, 2021. **12**: p. 681639.
- 1020 16. Mikerov, A.N., et al., *Inhibition of hemagglutination activity of influenza A viruses*  
1021 *by SP-A1 and SP-A2 variants expressed in CHO cells*. Med Microbiol Immunol,  
1022 2008. **197**(1): p. 9-12.
- 1023 17. Garcia-Laorden, M.I., et al., *The role of mannose-binding lectin in pneumococcal*  
1024 *infection*. Eur Respir J, 2013. **41**(1): p. 131-9.

- 1025 18. Sawada, K., et al., *Pulmonary collectins protect macrophages against pore-*  
1026 *forming activity of Legionella pneumophila and suppress its intracellular growth.* J  
1027 Biol Chem, 2010. **285**(11): p. 8434-43.
- 1028 19. Fassan, M., et al., *Multi-Design Differential Expression Profiling of COVID-19*  
1029 *Lung Autopsy Specimens Reveals Significantly Deregulated Inflammatory*  
1030 *Pathways and SFTPC Impaired Transcription.* Cells, 2022. **11**(6): p. 1011.
- 1031 20. Perkins, T.N., M.L. Donnell, and T.D. Oury, *The axis of the receptor for advanced*  
1032 *glycation endproducts in asthma and allergic airway disease.* Allergy, 2021.  
1033 **76**(5): p. 1350-1366.
- 1034 21. Yue, Q., et al., *Receptor for Advanced Glycation End Products (RAGE): A Pivotal*  
1035 *Hub in Immune Diseases.* Molecules, 2022. **27**(15): p. 4922.
- 1036 22. Koerich, S., et al., *Receptors for Advanced Glycation End Products (RAGE):*  
1037 *Promising Targets Aiming at the Treatment of Neurodegenerative Conditions.*  
1038 Curr Neuropharmacol, 2022. Sep 22. doi:  
1039 10.2174/1570159X20666220922153903. Online ahead of print
- 1040 23. Yamaguchi, K., et al., *Association of the RAGE/RAGE-ligand axis with interstitial*  
1041 *lung disease and its acute exacerbation.* Respir Investig, 2022. **60**(4): p. 531-  
1042 542.
- 1043 24. Hofmann, M.A., et al., *RAGE mediates a novel proinflammatory axis: a central*  
1044 *cell surface receptor for S100/calgranulin polypeptides.* Cell, 1999. **97**(7): p. 889-  
1045 901.
- 1046 25. Kapandji, N., et al., *Importance of Lung Epithelial Injury in COVID-19-associated*  
1047 *Acute Respiratory Distress Syndrome: Value of Plasma Soluble Receptor for*  
1048 *Advanced Glycation End-Products.* Am J Respir Crit Care Med, 2021. **204**(3): p.  
1049 359-362.
- 1050 26. Chiappalupi, S., et al., *Hyperactivated RAGE in Comorbidities as a Risk Factor*  
1051 *for Severe COVID-19-The Role of RAGE-RAS Crosstalk.* Biomolecules, 2021.  
1052 **11**(6): p. 876.
- 1053 27. Zhang, K. and S.H. Phan, *Cytokines and pulmonary fibrosis.* Biol Signals, 1996.  
1054 **5**(4): p. 232-9.
- 1055 28. Zhu, Y., et al., *Calcium in Vascular Smooth Muscle Cell Elasticity and Adhesion:*  
1056 *Novel Insights Into the Mechanism of Action.* Front Physiol, 2019. **10**: p. 852.
- 1057 29. Ringvold, H.C. and R.A. Khalil, *Protein Kinase C as Regulator of Vascular*  
1058 *Smooth Muscle Function and Potential Target in Vascular Disorders.* Adv  
1059 Pharmacol, 2017. **78**: p. 203-301.
- 1060 30. Morita, K., et al., *Endothelial claudin: claudin-5/TMVCF constitutes tight junction*  
1061 *strands in endothelial cells.* J Cell Biol, 1999. **147**(1): p. 185-94.
- 1062 31. Schlingmann, B., S.A. Molina, and M. Koval, *Claudins: Gatekeepers of lung*  
1063 *epithelial function.* Semin Cell Dev Biol, 2015. **42**: p. 47-57.
- 1064 32. Williams, M.R., et al., *Gene expression of endothelial cells due to interleukin-1*  
1065 *beta stimulation and neutrophil transmigration.* Endothelium, 2008. **15**(1): p. 73-  
1066 84.
- 1067 33. Hashimoto, R., et al., *SARS-CoV-2 disrupts respiratory vascular barriers by*  
1068 *suppressing Claudin-5 expression.* Sci Adv, 2022. **8**(38): p. eabo6783.
- 1069 34. Pang, L., et al., *Role of caveolin-1 in human organ function and disease: friend or*  
1070 *foe?* Carcinogenesis, 2022. **43**(1): p. 2-11.

- 1071 35. Gokani, S. and L.K. Bhatt, *Caveolin-1: A Promising Therapeutic Target for*  
1072 *Diverse Diseases*. *Curr Mol Pharmacol*, 2022. **15**(5): p. 701-715.
- 1073 36. Lagrange, J., et al., *Alpha-2-macroglobulin in hemostasis and thrombosis: An*  
1074 *underestimated old double-edged sword*. *J Thromb Haemost*, 2022. **20**(4): p.  
1075 806-815.
- 1076 37. Vandooren, J. and Y. Itoh, *Alpha-2-Macroglobulin in Inflammation, Immunity and*  
1077 *Infections*. *Front Immunol*, 2021. **12**: p. 803244.
- 1078 38. Mathison, R., J.S. Davison, and A.D. Befus, *Neural regulation of neutrophil*  
1079 *involvement in pulmonary inflammation*. *Comp Biochem Physiol C Comp*  
1080 *Pharmacol Toxicol*, 1993. **106**(1): p. 39-48.
- 1081 39. Sahu, S.K., et al., *Emerging roles of the complement system in host-pathogen*  
1082 *interactions*. *Trends Microbiol*, 2022. **30**(4): p. 390-402.
- 1083 40. Magro, C., et al., *Complement associated microvascular injury and thrombosis in*  
1084 *the pathogenesis of severe COVID-19 infection: A report of five cases*. *Transl*  
1085 *Res*, 2020. **220**: p. 1-13.
- 1086 41. Mastaglio, S., et al., *The first case of COVID-19 treated with the complement C3*  
1087 *inhibitor AMY-101*. *Clin Immunol*, 2020. **215**: p. 108450.
- 1088 42. Afzali, B., et al., *The state of complement in COVID-19*. *Nat Rev Immunol*, 2022.  
1089 **22**(2): p. 77-84.
- 1090 43. Freeley, S., et al., *Asparaginyl Endopeptidase (Legumain) Supports Human Th1*  
1091 *Induction via Cathepsin L-Mediated Intracellular C3 Activation*. *Front Immunol*,  
1092 2018. **9**: p. 2449.
- 1093 44. Zizzo, G., et al., *Immunotherapy of COVID-19: Inside and Beyond IL-6 Signalling*.  
1094 *Front Immunol*, 2022. **13**: p. 795315.
- 1095 45. Zhao, M.M., et al., *Cathepsin L plays a key role in SARS-CoV-2 infection in*  
1096 *humans and humanized mice and is a promising target for new drug*  
1097 *development*. *Signal Transduct Target Ther*, 2021. **6**(1): p. 134.
- 1098 46. Trapani, J.A. and M.J. Smyth, *Killing by cytotoxic T cells and natural killer cells:*  
1099 *multiple granule serine proteases as initiators of DNA fragmentation*. *Immunol*  
1100 *Cell Biol*, 1993. **71 ( Pt 3)**: p. 201-8.
- 1101 47. Berezin, V., et al., *Targeting of ECM molecules and their metabolizing enzymes*  
1102 *and receptors for the treatment of CNS diseases*. *Prog Brain Res*, 2014. **214**: p.  
1103 353-88.
- 1104 48. Pimentel, E., *Colony-stimulating factors*. *Ann Clin Lab Sci*, 1990. **20**(1): p. 36-55.
- 1105 49. Venet, F., et al., *Myeloid cells in sepsis-acquired immunodeficiency*. *Ann N Y*  
1106 *Acad Sci*, 2021. **1499**(1): p. 3-17.
- 1107 50. Roussel, L. and D.C. Vinh, *ICOSL in host defense at epithelial barriers: lessons*  
1108 *from ICOSLG deficiency*. *Curr Opin Immunol*, 2021. **72**: p. 21-26.
- 1109 51. Panneton, V., et al., *Inducible T-cell co-stimulator: Signaling mechanisms in T*  
1110 *follicular helper cells and beyond*. *Immunol Rev*, 2019. **291**(1): p. 91-103.
- 1111 52. Mulcahy, H., et al., *LST1 and NCR3 expression in autoimmune inflammation and*  
1112 *in response to IFN-gamma, LPS and microbial infection*. *Immunogenetics*, 2006.  
1113 **57**(12): p. 893-903.
- 1114 53. Heidemann, J., et al., *Regulated expression of leukocyte-specific transcript (LST)*  
1115 *1 in human intestinal inflammation*. *Inflamm Res*, 2014. **63**(7): p. 513-7.

- 1116 54. Chen, Z., X. Qiu, and J. Gu, *Immunoglobulin expression in non-lymphoid lineage*  
1117 *and neoplastic cells*. Am J Pathol, 2009. **174**(4): p. 1139-48.
- 1118 55. Vettermann, C. and M.S. Schlissel, *Allelic exclusion of immunoglobulin genes:*  
1119 *models and mechanisms*. Immunol Rev, 2010. **237**(1): p. 22-42.
- 1120 56. Napodano, C., et al., *Mono/polyclonal free light chains as challenging biomarkers*  
1121 *for immunological abnormalities*. Adv Clin Chem, 2022. **108**: p. 155-209.
- 1122 57. Godyna, S., M. Diaz-Ricart, and W.S. Argraves, *Fibulin-1 mediates platelet*  
1123 *adhesion via a bridge of fibrinogen*. Blood, 1996. **88**(7): p. 2569-77.
- 1124 58. Harikrishnan, K., et al., *Cell Derived Matrix Fibulin-1 Associates With Epidermal*  
1125 *Growth Factor Receptor to Inhibit Its Activation, Localization and Function in*  
1126 *Lung Cancer Calu-1 Cells*. Front Cell Dev Biol, 2020. **8**: p. 522.
- 1127 59. Jackson, C.B., et al., *Mechanisms of SARS-CoV-2 entry into cells*. Nat Rev Mol  
1128 Cell Biol, 2022. **23**(1): p. 3-20.
- 1129 60. Felsenstein, S., et al., *COVID-19: Immunology and treatment options*. Clin  
1130 Immunol, 2020. **215**: p. 108448.
- 1131 61. Guizani, I., et al., *SARS-CoV-2 and pathological matrix remodeling mediators*.  
1132 Inflamm Res, 2021. **70**(8): p. 847-858.
- 1133 62. Zhang, F., et al., *SARS-CoV-2 pseudovirus infectivity and expression of viral*  
1134 *entry-related factors ACE2, TMPRSS2, Kim-1, and NRP-1 in human cells from*  
1135 *the respiratory, urinary, digestive, reproductive, and immune systems*. J Med  
1136 Virol, 2021. **93**(12): p. 6671-6685.
- 1137 63. DeBruine, Z.J., K. Melcher, and T.J. Triche Jr, *Fast and robust non-negative*  
1138 *matrix factorization for single-cell experiments*. bioRxiv, 2021: p. 2021.09.  
1139 01.458620.
- 1140 64. Street, K., et al., *Slingshot: cell lineage and pseudotime inference for single-cell*  
1141 *transcriptomics*. BMC Genomics, 2018. **19**(1): p. 477.
- 1142 65. Sweeney, R.M. and D.F. McAuley, *Acute respiratory distress syndrome*. Lancet,  
1143 2016. **388**(10058): p. 2416-2430.
- 1144 66. Wynn, T.A., *Cellular and molecular mechanisms of fibrosis*. J Pathol, 2008.  
1145 **214**(2): p. 199-210.
- 1146 67. Turpin, E.A., et al., *Respiratory syncytial virus infection reduces lung*  
1147 *inflammation and fibrosis in mice exposed to vanadium pentoxide*. Respir Res,  
1148 2010. **11**: p. 20.
- 1149 68. Elewa, Y.H.A., et al., *Histopathological Correlations between Mediastinal Fat-*  
1150 *Associated Lymphoid Clusters and the Development of Lung Inflammation and*  
1151 *Fibrosis following Bleomycin Administration in Mice*. Front Immunol, 2018. **9**: p.  
1152 271.
- 1153 69. Nagata, N., et al., *Features of idiopathic pulmonary fibrosis with organizing*  
1154 *pneumonia*. Respiration, 1997. **64**(5): p. 331-5.
- 1155 70. Phan, S.H., *The myofibroblast in pulmonary fibrosis*. Chest, 2002. **122**(6 Suppl):  
1156 p. 286S-289S.
- 1157 71. Ortiz-Zapater, E., et al., *Lung Fibrosis and Fibrosis in the Lungs: Is It All about*  
1158 *Myofibroblasts?* Biomedicines, 2022. **10**(6).
- 1159 72. Habermann, A.C., et al., *Single-cell RNA sequencing reveals profibrotic roles of*  
1160 *distinct epithelial and mesenchymal lineages in pulmonary fibrosis*. Sci Adv,  
1161 2020. **6**(28): eaba1972.

- 1162 73. Laloglu, E. and H. Alay, *Role of transforming growth factor-beta 1 and connective*  
1163 *tissue growth factor levels in coronavirus disease-2019-related lung Injury: a*  
1164 *prospective, observational, cohort study.* Rev Soc Bras Med Trop, 2022. **55**: p.  
1165 e06152021.
- 1166 74. Vaz de Paula, C.B., et al., *COVID-19: Immunohistochemical Analysis of TGF-*  
1167 *beta Signaling Pathways in Pulmonary Fibrosis.* Int J Mol Sci, 2021. **23**(1): p.  
1168 168.
- 1169 75. Fan, T., et al., *Discovery of 9O-Substituted Palmatine Derivatives as a New*  
1170 *Class of anti-COL1A1 Agents via Repressing TGF-beta1/Smads and*  
1171 *JAK1/STAT3 Pathways.* Molecules, 2020. **25**(4): p.773.
- 1172 76. Malik, M., et al., *Cross-talk between Janus kinase-signal transducer and activator*  
1173 *of transcription pathway and transforming growth factor beta pathways and*  
1174 *increased collagen1A1 production in uterine leiomyoma cells.* F S Sci, 2020.  
1175 **1**(2): p. 206-220.
- 1176 77. Stringer, C., et al., *Cellpose: a generalist algorithm for cellular segmentation.* Nat  
1177 Methods, 2021. **18**(1): p. 100-106.
- 1178 78. Qi, F., et al., *Single cell RNA sequencing of 13 human tissues identify cell types*  
1179 *and receptors of human coronaviruses.* Biochem Biophys Res Commun, 2020.  
1180 **526**(1): p. 135-140.
- 1181 79. Sungnak, W., et al., *SARS-CoV-2 entry factors are highly expressed in nasal*  
1182 *epithelial cells together with innate immune genes.* Nat Med, 2020. **26**(5): p. 681-  
1183 687.
- 1184 80. Xu, G., et al., *The differential immune responses to COVID-19 in peripheral and*  
1185 *lung revealed by single-cell RNA sequencing.* Cell Discov, 2020. **6**: p. 73.
- 1186 81. Zou, X., et al., *Single-cell RNA-seq data analysis on the receptor ACE2*  
1187 *expression reveals the potential risk of different human organs vulnerable to*  
1188 *2019-nCoV infection.* Front Med, 2020. **14**(2): p. 185-192.
- 1189 82. Sounart, H., et al., *Dual spatially resolved transcriptomics for SARS-CoV-2 host-*  
1190 *pathogen colocalization studies in humans.* bioRxiv, 2022: p. 2022.03.  
1191 14.484288.
- 1192 83. Pielawski, N., et al., *TissUUmaps 3: Interactive visualization and quality*  
1193 *assessment of large-scale spatial omics data.* BioRxiv, 2022. doi:  
1194 <https://doi.org/10.1101/2022.01.28.478131>.
- 1195 84. Solorzano, L., G. Partel, and C. Wahlby, *TissUUmaps: interactive visualization of*  
1196 *large-scale spatial gene expression and tissue morphology data.* Bioinformatics,  
1197 2020. **36**(15): p. 4363-4365.
- 1198 85. Satija, R., et al., *Spatial reconstruction of single-cell gene expression data.* Nat  
1199 Biotechnol, 2015. **33**(5): p. 495-502.
- 1200 86. Anselin, L., *Local indicators of spatial association—LISA.* Geographical analysis,  
1201 1995. **27**(2): p. 93-115.  
1202

1203 **Acknowledgments**

1204           We thank members of Drs. Shou-Jiang Gao and Yufei Huang laboratories for  
1205 technical assistance and discussions. This study was supported by grants from the  
1206 National Institutes of Health (CA096512 and CA124332 to S.-J. Gao), UPMC Hillman  
1207 Cancer Center Startup Funds to S.-J. Gao and Y. Huang, and in part by award  
1208 P30CA047904. This research was also supported in part by the University of Pittsburgh  
1209 Center for Research Computing, RRID:SCR\_022735, through the resources provided.  
1210 Specifically, this work used the HTC cluster, which is supported by the National Institutes  
1211 of Health (S10OD028483).

1212

1213 **Author contributions**

1214           S.-J. Gao and Y. Huang conceived, designed, supervised and managed the  
1215 project. W. Meng, S.R. da Silva and L.P. Chen performed the experiments. G.L. Sica  
1216 and W. Meng performed the pathological examination. A. Das, Z.T. Liu, D.M. Hasib, H.  
1217 Galloway and Y. Huang developed the computational pipeline and performed the  
1218 analyses. A. Das, W. Meng, Z.T. Liu, D.M. Hasib, H. Galloway, S.R. da Silva, L.P.  
1219 Chen, Y.F., K.P. Rivera, M. Flores, Y.-C. Chiu, Y. Huang and S.-J. Gao interpreted the  
1220 data and participated in the discussions throughout the analysis. A. Paniz-Mondolfi, C.  
1221 Bryce, Z. Grimes, E.M. Sodillo and C. Cordon-Cardo obtained the COVID-19 samples.  
1222 Y. Huang and S.-J. Gao wrote the manuscript with input from all the authors. All the  
1223 authors read, reviewed and approved the manuscript.

1224

1225 **Competing interests**

1226           The authors declare no competing interests.

1227

1228   **Data availability**

1229           The data supporting findings in this study including all the original spatial single-  
1230 cell transcriptome data, segmented and filtered reads of all cells, and DAPI and H&E  
1231 staining images will be deposited to Zenodo. The spatial single-cell transcriptome data  
1232 will also be deposited in GEO.

1233

1234   **Code availability**

1235           All codes will be available at Zenodo.

1236

1237   **Supplementary information**

1238           The online version contains supplementary material available at:

1239

1240   **Correspondence and requests for materials** should be addressed to Shou-Jiang Gao  
1241 or Yufei Huang.



1242 **Figure Legend**

1243 **Figure 1: Spatial organization of parenchymal and immune cells in COVID-19 lung**  
1244 **tissues revealed by spatial single-cell transcriptome analysis (SSCTA). A.**

1245 Schematic illustration of the spatial single-cell sequencing pipeline used to generate the  
1246 target dataset comprised of healthy control (non-COVID-19 tissue, n=1) and COVID-19  
1247 tissues (n=5). Samples were hybridized and decoded by sequencing. DAPI and H&E  
1248 staining were carried out. All samples were annotated by an expert pathologist (Fig.  
1249 S1). **B.** SSCTA workflow illustrating cell segmentation, cell typing, neighborhood cell-  
1250 type composition (NCTC) analysis, and tissue pathology analysis. **C.** Average  
1251 expression of cell type markers of all segmented cells across identified cell types in the  
1252 SSCTA dataset. **D.** The UMAP projection of the gene expressions of segmented cells  
1253 colored based on cell type, infection, and sample identifier. The UMAP shows negligible  
1254 batch differences between the samples. **E.** Spatial visualization of identified cell types in  
1255 two COVID-19 tissues and the non-COVID-19 tissue along with individual spatial plots  
1256 illustrating the neighborhood cell type composition of specific cell types. We identified  
1257 DAD in all COVID-19 tissues and orderly distribution of major parenchymal cells in non-  
1258 COVID-19 tissue (PBC-PR). Further plots are provided in Fig. S1. **F.** Bar plots showing  
1259 the percentages of identified cell types and their percentages of SARS-CoV-2 infected  
1260 cells.

1261

1262 **Figure 2: SARS-CoV-2 infection induces global differential gene expression that**  
1263 **mediates pathological damages and inflammation with cell type and spatial**

1264 **features. A.** Differential gene expressions between the identified cells in the COVID-19

1265 non-COVID-19 tissue with various conditions are illustrated. The title indicates the  
1266 conducted differential expression analysis. Within each row, the bubble size indicates  
1267 the  $-\log_{10}$  of the corrected p-value and the color indicates the  $\log_2$  fold change of the  
1268 corresponding gene. Each column indicates the different COVID-19 tissues. The first  
1269 three panels indicate differential expression analysis between COVID-19 tissues and  
1270 non-COVID-19 tissue while the fourth panel indicates the differential expression  
1271 analysis between the infected and uninfected cells in the respective COVID-19 tissues.  
1272 **B.** Spatial gene expression map of highly expressed CTSL and IGKC. **C.** Spatial gene  
1273 expression maps of the rest of the differentially expressed genes. **D.** Pie chart  
1274 illustrating the percentages of cell types in which the genes are expressed in each  
1275 tissue. **E.** Differential expression analysis of COVID-19 tissues compared to non-  
1276 COVID-19 tissue in cell types that had significant changes in cell numbers based on  
1277 Fig. 1F.

1278

1279 **Figure 3: Spatial analysis of local SARS-CoV-2 infection rates identifies regions**  
1280 **with high infection rates that match high cell densities, high levels of viral entry-**  
1281 **related factors, and localized pathology. A.** Spatial distribution of the SARS-CoV-2  
1282 infected cells. The spatial visualization of the infection rates revealed infection hotspots  
1283 in the COVID-19 tissues. **B.** Moran's I analysis of spatial patterns revealed spatially  
1284 distinct high and low infection regions in each COVID-19 tissue. **C.** Spatial visualization  
1285 of the significant local regions identified by Bivariate Moran's I analysis, in which  
1286 infection rates and the expressions of TMPRSS2, NRP1, FURIN and ACE2 are spatially  
1287 correlated. **D.** Spatial visualization of the kernel density plot for the cell densities

1288 revealed highly dense cellular hotspots in the COVID-19 samples. **E.** Spatial  
1289 visualization of the significant local regions identified by Bivariate Moran's I analysis, in  
1290 which cell densities and the infection regions are spatially correlated, identified as high-  
1291 density high-infection (HIHD) regions. **F.** Spatial visualization of the ligand-receptor  
1292 coexpression maps for the CSF3-CSF3R pair, which are highly expressed in the high  
1293 infection regions. **G.** Spatial visualization of the significant local regions identified by  
1294 Bivariate Moran's I analysis, in which both high infection and high CSF3-CSF3R  
1295 coexpression regions are spatially correlated.

1296

1297 **Figure 4: Spatial analysis reveals cellular and gene expression features in regions**  
1298 **with high SARS-CoV-2 infection rates. A.** A bar plot showing the cell type  
1299 composition of all identified cell types in the high and low infection regions. The increase  
1300 in alveolar cells (ACs) might suggest the proliferation of ACs due to injury repair of  
1301 alveoli and alveoli capillaries and a decrease in epithelial cells (ECs) and vascular  
1302 endothelial cells (VECs) might suggest the damages caused by the infection. **B.** UMAP  
1303 projection of the NCTC analysis results of high infection regions (refer to figure 3B)  
1304 revealed three distinct clusters out of which two were distinctly enriched in local  
1305 compositions of ACs and fibroblasts, which are illustrated on the right with their spatial  
1306 visualizations. **C.** Spatial visualization of the compositions in high infection regions  
1307 revealed negative correlation of fibroblasts and ACs (-0.6, Pearson correlation) which  
1308 overlapped with annotated OP regions (high fibroblasts, low ACs). **D.** Differential  
1309 expressions of high and low infection regions of the COVID-19 tissues compared to the  
1310 non-COVID-19 tissue, which share 18 of the 20 differentially expressed genes,

1311 confirming strong indirect effect of SARS-CoV-2 infection. **E.** Differential expressions  
1312 between the high and low infection regions of the COVID-19 tissues revealed distinct  
1313 differentially expressed genes showing upregulation of AC markers SFTPA1 and  
1314 SFTPA2 in tissues 1, 3, and 5, and fibroblast markers COL1A1 or COL1A2 in all  
1315 COVID-19 tissues. **F.** Spatial visualization of the spatial gene expression map of  
1316 COL1A1 and COL1A2 markers.

1317

1318 **Figure 5: Sparse non-negative matrix factorization (SNMF) identifies seven cell**  
1319 **composition signatures that recapitulate different healthy and disease statuses.**

1320 **A.** SNMF revealed seven NCTC signatures which are illustrated in a logo plot. **B.**

1321 Spatial NCTC signatures visualized after factor loading for each tissue revealed their  
1322 associations with normal structures and broad and tissue-specific infection. **C.**

1323 Trajectory analysis of the cell type compositions with Signatures 1 and 3 generated a  
1324 trajectory of reduced normal alveoli and increased immune infiltration from the non-  
1325 COVID-19 tissue to COVID-19 tissues 1, 4, 3, 5, and 2. The trajectory agrees with the  
1326 order of the severity of pathology in the tissues identified in the H&E stained images  
1327 (Fig. S1).

1328

1329 **Figure 6: Unique cell composition signatures define two separate pathological**

1330 **trajectories. A.** The UMAP projection of the Signatures 1 (for non-COVID-19 tissue

1331 reference) and Signatures 4-7 recapitulated the severity of pathological progression

1332 identified in figure 5C. Two trajectories were derived from the pseudo-progressions of

1333 cells defined by these signatures. The trajectories showed a common shared onset T1

1334 and T2 which traverses through Signature 1 “normal-like-alveoli” and Signature 4 “ACs  
1335 with MMs infiltration” in T1 and then those enriched by Signature 4 and Signature 5  
1336 “VECs with MMs infiltration” in T2. The trajectory then diverged into two paths T3a and  
1337 T4a, and T3b and T4b. Path/Trajectory A defined by T3a and T4a progressed through  
1338 cells mostly from tissues 3 and 4 enriched in Signature 5 “VEC with MMs infiltration”  
1339 ending in Signature 6 “VEC with NK cell infiltration”, which was almost exclusively from  
1340 tissue 3. Path/Trajectory B defined by T3b and T4b are enriched by Signature 6 in T3b  
1341 and Signature 7 “high fibroblasts with MMs infiltration” in T4b. **B.** UMAP projections of  
1342 the five signatures colored based on their individual signature loadings. **C.** Line plots  
1343 illustrating the cell type percentages in band T1, T2, T3(a, b), and T4(a, b). **D.** Spatial  
1344 visualization of the cells by cell type in each band is shown along with an identified  
1345 representative ROI (red box with dotted lines) for each COVID-19 tissue. Column 7  
1346 illustrates the H&E morphology image of the COVID-19 tissues with black dotted lines  
1347 highlighting the high infection regions. **E.** Zoomed-in images of the ROIs selected are  
1348 shown. A close examination revealed characteristics of early DAD in T1 and T2, hyaline  
1349 membrane, fibrin, lymphocytic infiltration, collapsed alveoli and capillary structure in T3a  
1350 and T4a, and edema, increased fibrin, and organizing pneumonia (OP) in T3b and T4b  
1351 suggesting a more advanced stage of DAD.

1352

1353 **Figure 7: IL6-STAT3 and TGF- $\beta$ -SMAD2/3 pathways mediate COVID-19 lung**

1354 **fibrosis and organizing pneumonia. A.** Zoomed in OP region (bottom, red color  
1355 border) and other non-OP regions (top, black color border) from the H&E image of

1356 COVID-19 tissue 1-2C are illustrated. **B.** Identified cells colored based on the cell types

1357 revealed differences in cell composition signatures between OP and other regions. **C.**  
1358 Bar plot showing an increase in cell density in OP regions compared to other regions. **D.**  
1359 Bar plot showing the percentage of cells per cell type in COVID-19 and non-COVID-19  
1360 tissues. There is a decrease in ACs and VECs, and an increase in fibroblasts in the OP  
1361 regions of the COVID-19 tissue. An obvious increase in ACs is seen in the non-COVID-  
1362 19 sample. **E.** Differential gene expressions between the identified cells in the OP  
1363 regions of the COVID-19 tissue sample with cells from the non-COVID-19 tissue and  
1364 cells from the other non-OP regions of the same COVID-19 tissue is illustrated. We  
1365 observed an upregulation of genes encoding for collagen type I alpha 1 and 2 chains  
1366 (COL1A1 and COL1A2) in OP in both tissues compared to the normal tissue or to  
1367 regions without OP in the same COVID-19 lung tissues. **F.** Pie chart illustrating the  
1368 percentages of cell types in which the selected genes are expressed in tissues 1 and 2.  
1369 **G.** Spatial visualization of differentially expressed genes from figure 7E. The size of the  
1370 dots indicates the expression level, and the color indicates the cell type of the cell where  
1371 the gene is expressed. **H.** Differential gene expressions between the identified cells in  
1372 the OP regions of the COVID-19 tissue with cells from the non-COVID-19 tissue as well  
1373 as non-OP regions from the same COVID-19 tissue based on their cell types. Both  
1374 COL1A1 and COL1A2 were upregulated in fibroblasts in OP regions compared to  
1375 fibroblasts from either normal tissue or non-OP regions from the same tissue. **I.** The  
1376 density plot of the COL1A1 and COL1A2 expressions in OP and other non-OP regions  
1377 in COVID-19 tissue samples 1-2C, 2-1A, and non-COVID-19 tissue is illustrated. **J.**  
1378 Examination of the networks associated with the Pulmonary Fibrosis Idiopathic  
1379 Signaling Pathways reported by the Ingenuity Pathway Analysis is illustrated. Both IL6-

1380 STAT3 and TGF- $\beta$ -SMAD2/3 pathways mediate the expression of COL1A1 and  
1381 COL1A2. **K.** Multi-color IFA staining revealed that cells with a high COL1A1 expression  
1382 level also had high levels of IL6R $\alpha$ , p-STAT3, TGF- $\beta$ R2 and SMAD2/3, confirming the  
1383 activation of these pathways and their potential roles in the upregulation of COL1A1.

1384 **Supplemental Information**

1385

1386 **Supplemental Tables**

1387 **Table S1. Gene annotation, cell type markers, and total cells expressing**  
1388 **individual genes and total reads of the individual genes in each lung tissue after**  
1389 **segmentation.**

1390

1391 **Table S2. Summary of cell segmentation results.**

1392

1393 **Table S3. Summary of cell typing results and SARS-CoV-2 infection status.**

1394

1395 **Table S4. Global spatial correlations between local SARS-CoV-2 infection rates**  
1396 **and cell densities by global Moran's I.**

1397

1398 **Table S5. Cell composition signatures identified by sparse non-negative matrix**  
1399 **factorization (SNMF).**

1400

1401 **Table S6. Spearman correlations of pseudotime Trajectory A versus gene**  
1402 **expressions.**

1403

1404 **Table S7. Spearman correlations of pseudotime Trajectory B versus gene**  
1405 **expressions.**

1406



1407 **Supplementary Figures**

1408

1409 **Supplementary Figure 1:** Hematoxylin and eosin (H&E) stained images of the five  
1410 COVID-19 tissues (1-2C, 2-1A, 3-1A, 4-3B, 5-3B) and the non-COVID-19 tissue (PBC-  
1411 PR) along with pathology annotations are illustrated. We observe various degrees of  
1412 diffuse alveolar damage (DAD) in the COVID-19 tissues. Tissues 1 and 2 (1-2C and 2-  
1413 1A) had prominent organizing pneumonia (OP) while edema, hyaline membrane, and  
1414 fibrin clot were prominent in tissues 3, 4, and 5 (3-1A, 4-3B, and 5-3B).

1415

1416 **Supplementary Figure 2:** 4',6-diamidino-2-phenylindole (DAPI) staining of all tissues  
1417 under study revealed the nuclei location. We used the DAPI-stained images to facilitate  
1418 cell nuclei segmentation using the CellPose algorithm.

1419

1420 **Supplementary Figure 3: A.** Bar plot showing the total number of reads and the reads  
1421 that are segmented to cells using the Baysor algorithm for all tissues under study. We  
1422 segmented ~89%-95% of the reads into cells. **B.** Bar plot showing the total number of  
1423 segmented cells and the identified cells with a cell-marker read. A total of 1,719,459  
1424 cells were identified across the tissues.

1425

1426 **Supplementary Figure 4:** A representative image showing cell boundary polygons of  
1427 the cells segmented using the Baysor algorithm. Baysor used a binary mask of the  
1428 DAPI image as a prior to guide the cell segmentation.

1429

1430 **Supplementary Figure 5:** Bar plots showing the distribution of the number of  
1431 transcripts (reads) that are segmented to each cell. Over 99% of the cells harbored at  
1432 least 5-15 reads.

1433

1434 **Supplementary Figure 6:** Heatmaps illustrating the average expressions of marker  
1435 genes in each cell type within each tissue. In all tissues, a total of 18 cell types were  
1436 identified including 11 types of parenchymal cells and 7 types of immune cells.

1437

1438 **Supplementary Figure 7:** Uniform Manifold Approximation and Projection (UMAP) of  
1439 the gene expressions of individual cells revealed separated clusters for major  
1440 parenchymal cells including alveolar cells (ACs) and fibroblasts. By contrast, immune  
1441 cells were grouped together and mixed with vascular endothelial cells (VECs) in several  
1442 clusters. The poor separation of immune cell types was largely due to highly expressed  
1443 Immunoglobulin kappa light chain (IGKC) and Cathepsin L (CTSL) in these cell types,  
1444 which is further illustrated in Fig. S8.

1445

1446 **Supplementary Figure 8:** The UMAP of the gene expressions of all segmented and  
1447 cell-typed cells across all tissues under study is illustrated in the bottom-right panel.  
1448 Here, the color of the dots indicates the tissue samples. The rest of the UMAPs illustrate  
1449 the expressions of different genes colored based on their expression in each cell. We  
1450 observe that IGKC and CTSL are spread across many clusters, resulting in the poor  
1451 separation of immune cell types which are mixed with VECs.

1452

1453 **Supplementary Figure 9:** Spatial visualization of the segmented cells painted based on  
1454 their cell types along with the location of the SARS-CoV-2 reads marked with an 'X'.

1455

1456 **Supplementary Figure 10:** The neighborhood cell type composition (NCTC) analysis  
1457 for COVID-19 tissue 1-2C is illustrated based on the cell type.

1458

1459 **Supplementary Figure 11:** The neighborhood cell type composition (NCTC) analysis  
1460 for COVID-19 tissue 2-1A is illustrated based on the cell type.

1461

1462 **Supplementary Figure 12:** The neighborhood cell type composition (NCTC) analysis  
1463 for COVID-19 tissue 3-1A is illustrated based on the cell type.

1464

1465 **Supplementary Figure 13:** The neighborhood cell type composition (NCTC) analysis  
1466 for COVID-19 tissue 4-3B is illustrated based on the cell type.

1467

1468 **Supplementary Figure 14:** The neighborhood cell type composition (NCTC) analysis  
1469 for COVID-19 tissue 5-3B is illustrated based on the cell type.

1470

1471 **Supplementary Figure 15:** The neighborhood cell type composition (NCTC) analysis  
1472 for non-COVID-19 tissue PBC-PR is illustrated based on the cell type.

1473

1474 **Supplementary Figure 16:** Spatial visualization of regions with blood vessels revealed  
1475 the lining of VECs along the vessels together with other vessel-associated cells

1476 including ACs, fibroblasts and smooth muscle cells (SMCs). Each dot indicates a cell,  
1477 and the color of each dot indicates the cell type.

1478

1479 **Supplementary Figure 17:** Spatial visualization of a representative region with  
1480 bronchioles revealed the lining of epithelial cells (ECs), smooth muscle cells (SMCs)  
1481 and VECs along the bronchiole together with other bronchiole-associated cells including  
1482 ACs and fibroblasts. Each dot indicates a cell, and the color of each dot indicates the  
1483 cell type.

1484

1485 **Supplementary Figure 18:** Spatial visualization of the expressions of the 19  
1486 dysregulated genes in different cell types and their tissue distributions in COVID-19  
1487 tissue 1-2C are illustrated. We observe significant variations in the expression patterns  
1488 suggesting their complex involvements in different aspects of SARS-CoV-2 infection  
1489 and COVID-19 lung pathology. The color of each dot indicates the cell type, and the  
1490 size indicates their expression level.

1491

1492 **Supplementary Figure 19:** Spatial visualization of the expressions of the 19  
1493 dysregulated genes in different cell types and their tissue distributions in COVID-19  
1494 tissue 2-1A are illustrated. We observe significant variations in the expression patterns  
1495 suggesting their complex involvements in different aspects of SARS-CoV-2 infection  
1496 and COVID-19 lung pathology. The color of each dot indicates the cell type, and the  
1497 size indicates their expression level.

1498

1499 **Supplementary Figure 20:** Spatial visualization of the expressions of the 19  
1500 dysregulated genes in different cell types and their tissue distributions in COVID-19  
1501 tissue 3-1A are illustrated. We observe significant variations in the expression patterns  
1502 suggesting their complex involvements in different aspects of SARS-CoV-2 infection  
1503 and COVID-19 lung pathology. The color of each dot indicates the cell type, and the  
1504 size indicates their expression level.

1505

1506 **Supplementary Figure 21:** Spatial visualization of the expressions of the 19  
1507 dysregulated genes in different cell types and their tissue distributions in COVID-19  
1508 tissue 4-3B are illustrated. We observe significant variations in the expression patterns  
1509 suggesting their complex involvements in different aspects of SARS-CoV-2 infection  
1510 and COVID-19 lung pathology. The color of each dot indicates the cell type, and the  
1511 size indicates their expression level.

1512

1513 **Supplementary Figure 22:** Spatial visualization of the expressions of the 19  
1514 dysregulated genes in different cell types and their tissue distributions in COVID-19  
1515 tissue 5-3B are illustrated. We observe significant variations in the expression patterns  
1516 suggesting their complex involvements in different aspects of SARS-CoV-2 infection  
1517 and COVID-19 lung pathology. The color of each dot indicates the cell type, and the  
1518 size indicates their expression level.

1519

1520 **Supplementary Figure 23:** Spatial visualization of the expressions of the 19  
1521 dysregulated genes in different cell types and their tissue distributions in non-COVID-19

1522 tissue PBC-PR are illustrated. We observe significant variations in the expression  
1523 patterns suggesting their complex involvements in different aspects of SARS-CoV-2  
1524 infection and COVID-19 lung pathology. The color of each dot indicates the cell type,  
1525 and the size indicates their expression level.

1526

1527 **Supplementary Figure 24:** Bubble plots of cell-type specific differential expression  
1528 analysis of the high infection versus the low infection regions of the same COVID-19  
1529 tissues is illustrated. The analysis further confirmed the upregulation of SFTPA1 or  
1530 SFTPA2 in ACs and COL1A2 in fibroblasts in infected tissues. Within each row, the  
1531 bubble size indicates the  $-\log_{10}$  of the corrected p-value and the color indicates the  $\log_2$   
1532 fold change of the corresponding gene.

1533

1534 **Supplementary Figure 25:** Box plots of signature loadings for each identified signature  
1535 generated by the SNMF decomposition of NCTC vectors are illustrated.

1536

1537 **Supplementary Figure 26: A.** Heatmap illustrating the Spearman correlation of the  
1538 pseudotime scores of Trajectory A and the gene expression. **B.** Heatmap illustrating the  
1539 Spearman correlation of the pseudotime scores of Trajectory B and the gene  
1540 expression. **C.** Heatmap illustrating the Spearman correlation of the pseudotime scores  
1541 of Trajectory A and the ligand-receptor co-expression values of each cell. **D.** Heatmap  
1542 illustrating the Spearman correlation of the pseudotime scores of Trajectory B and the  
1543 ligand-receptor co-expression values of each cell. In all plots, deeper red indicates a  
1544 high positive correlation and deeper blue indicates a high negative correlation. We also

1545 apply a p-value threshold (p-values<0.5) to remove the genes with lesser correlations  
1546 and the removed genes are painted white to indicate no correlation.  
1547  
1548 **Supplementary Figure 27: Analysis of COVID-19 and IPF single-cell RNA-seq**  
1549 **datasets. A.** UMAP projections showing expression of COL1A1 and COL1A2, paired  
1550 with fibroblast and myofibroblast cell subtypes from single-cell RNA-seq COVID-19  
1551 tissue atlas. Violin plots showing expression of COL1A1 and COL1A2 in cells from  
1552 COVID-19 patients. **B.** GSEA enrichment of myofibroblasts in cells ranked by  
1553 expressions of COL1A1 and COL1A2 from the single-cell COVID-19 tissue atlas with a  
1554 resulting p-value < 0.001. The significant enrichment and the large number of highly  
1555 ranked hits indicate that most myofibroblasts from the single-cell COVID-19 tissue atlas  
1556 have high expressions of COL1A1 and COL1A2. **C.** UMAP projections showing  
1557 expressions of COL1A1 and COL1A2 next to UMAP of fibroblast cell subtypes from  
1558 single-cell RNA-seq pulmonary fibrosis dataset. Violin plots showing expressions of  
1559 COL1A1 and COL1A2 in IPF and control patients. The UMAPs and violin plots only  
1560 represent cells from IPF patients or control. **D.** GSEA enrichment of myofibroblast in  
1561 cells from IPF and control donors ranked by expressions of COL1A1 and COL1A2 with  
1562 a resulting p-value < 0.001. The significant enrichment and high correlation between the  
1563 myofibroblast cell type and high expressions of COL1A1 and COL1A2 indicate that  
1564 most myofibroblasts from the single-cell pulmonary fibrosis dataset have high  
1565 expressions of COL1A1 and COL1A2. **E.** A heatmap showing expressions of  
1566 significantly differentially expressed genes from the 'IPF High' run in cells with high and  
1567 low expressions of COL1A1 and COL1A2. **F.** A heatmap showing expressions of

1568 significantly differentially expressed genes from the 'IPF Diagnosis' cells with high and  
1569 low expressions of COL1A1 and COL1A2. **G.** GSEA enrichment of significantly  
1570 differentially expressed genes from the 'IPF Diagnosis' run against significantly  
1571 differentially expressed genes ordered by fold change from the 'IPF High' run with a  
1572 resulting p-value < 0.001. The high enrichment of upregulated genes and  
1573 downregulated genes from the 'IPF Diagnosis' run in the 'IPF High' run indicates that  
1574 the two differential expression analyses are capturing similar expression patterns. **H.** A  
1575 heatmap showing expression of differentially expressed genes in cells with high and low  
1576 COL1A1 and COL1A2 expressions from the single-cell COVID-19 dataset. **I.** GSEA  
1577 enrichment of significantly differentially expressed genes from the 'IPF High' run in  
1578 significantly differentially expressed genes from the COVID-19 dataset with a resulting  
1579 p-value < 0.001. The high ranking of the 'IPF High' genes indicates that similar genes  
1580 co-express with COL1A1 and COL1A2 in both COVID-19 and IPF when considering  
1581 IPF and control samples. **J.** GSEA enrichment of differentially expressed genes from  
1582 'IPF Diagnosis' against differentially expressed genes from the 'COVID High' run  
1583 ordered by fold change with a resulting p-value < 0.001. The high ranking of the 'IPF  
1584 Diagnosis' genes indicates that the genes that co-express with COL1A1 and COL1A2 in  
1585 COVID-19 have similar co-expression patterns in IPF. **K.** Top 10 enriched pathways  
1586 from IPA pathway analysis for the differentially expressed genes from the COVID-19  
1587 single-cell RNA-seq dataset.







**Figure 2**

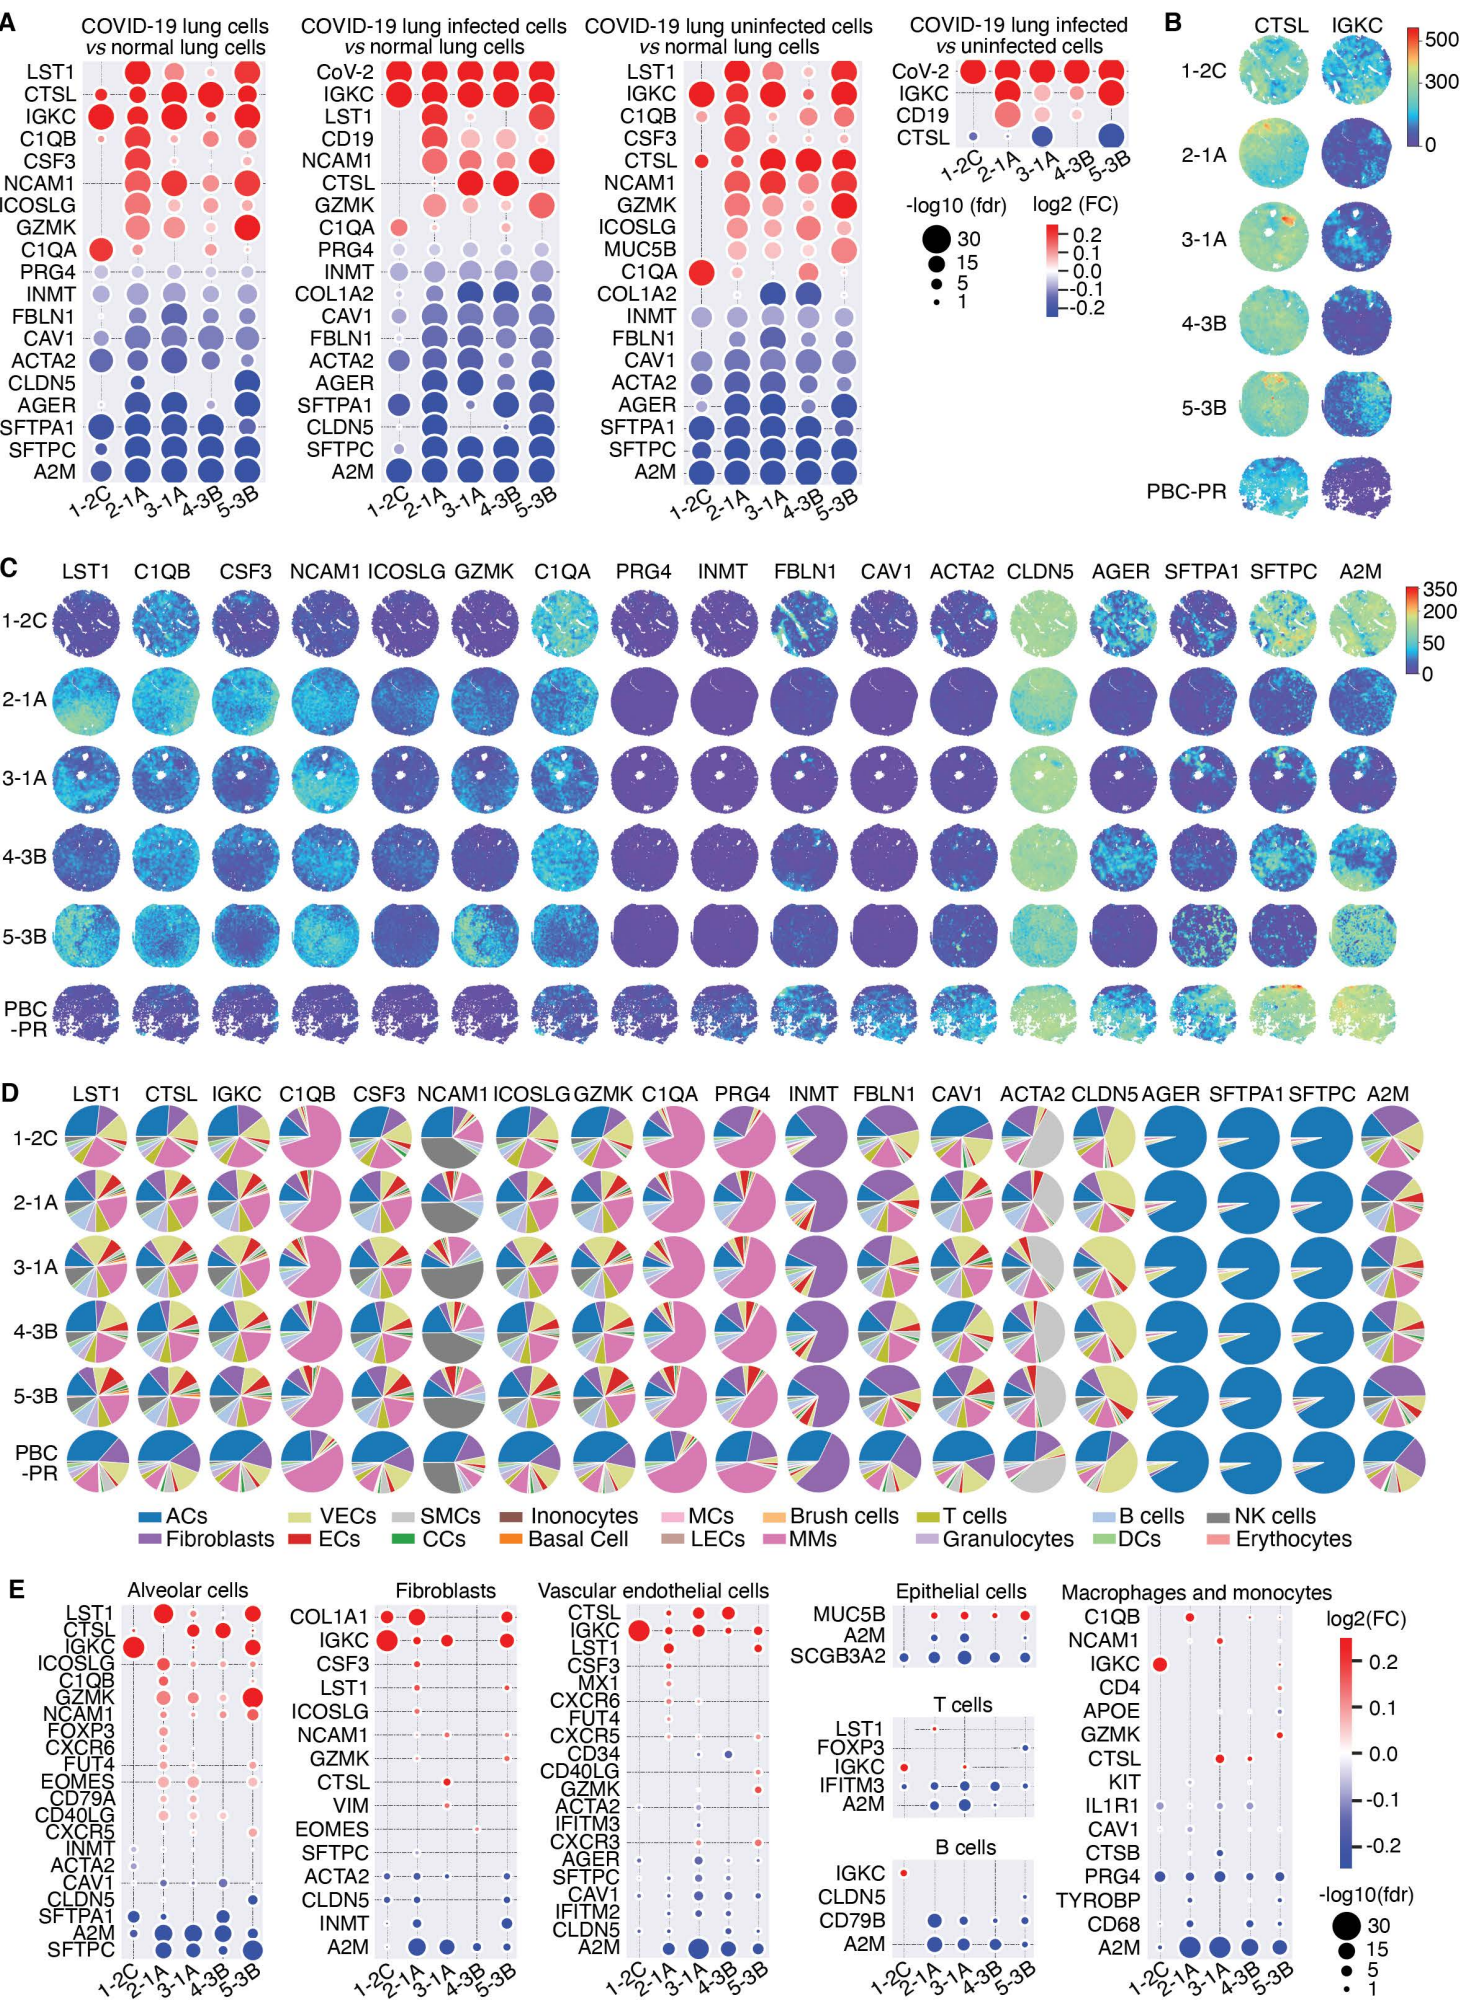



**Figure 3**

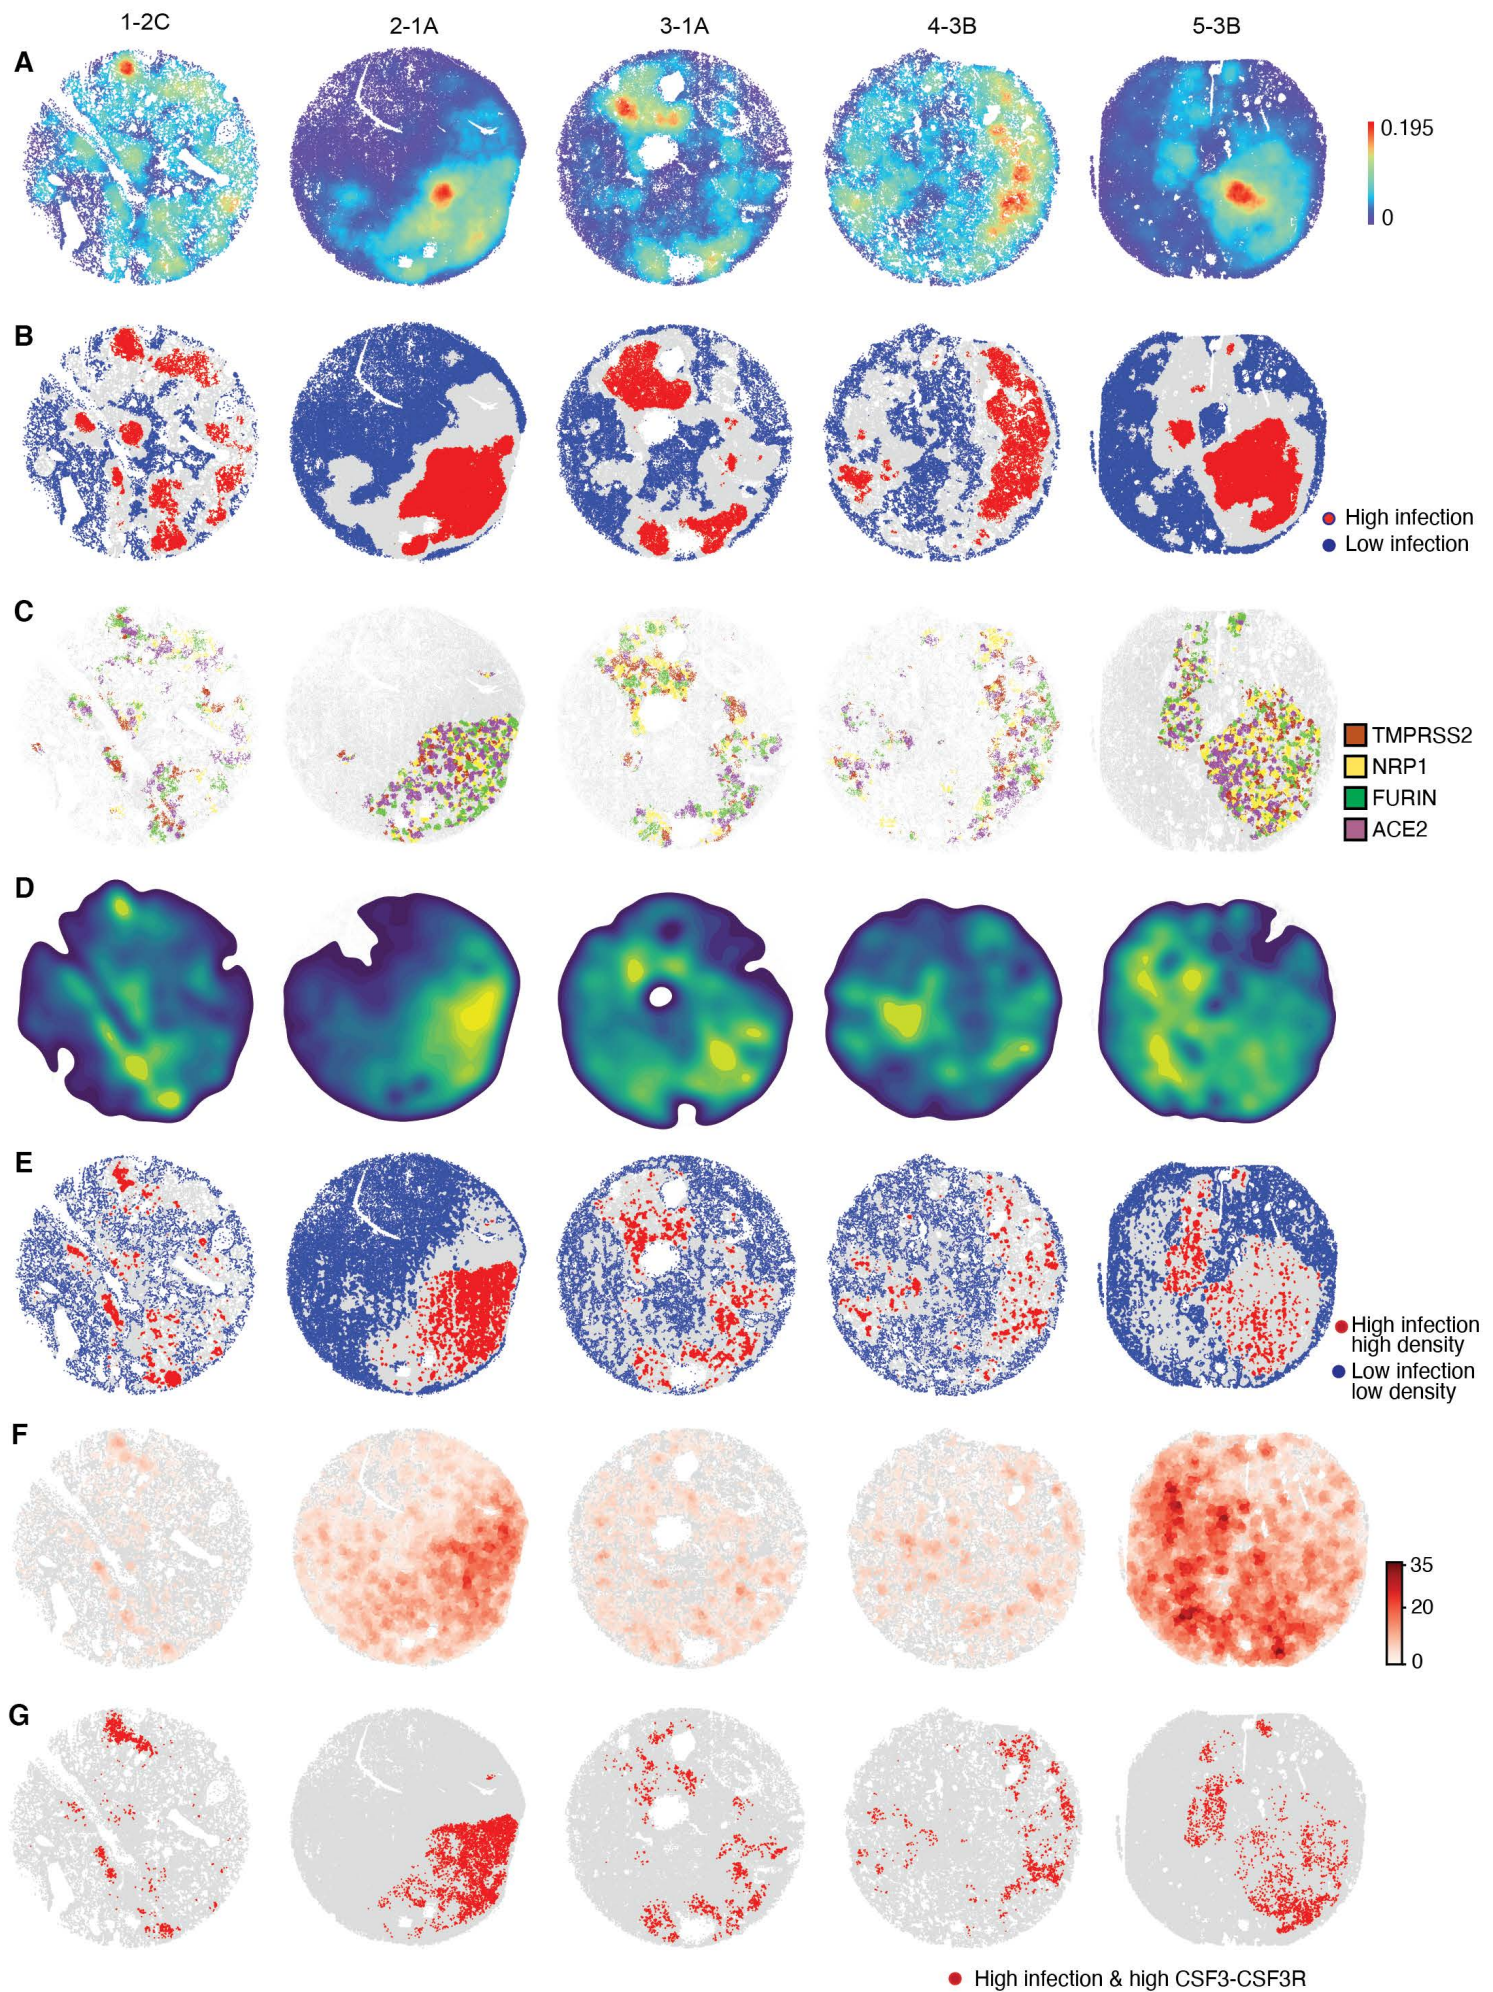



**Figure 4**

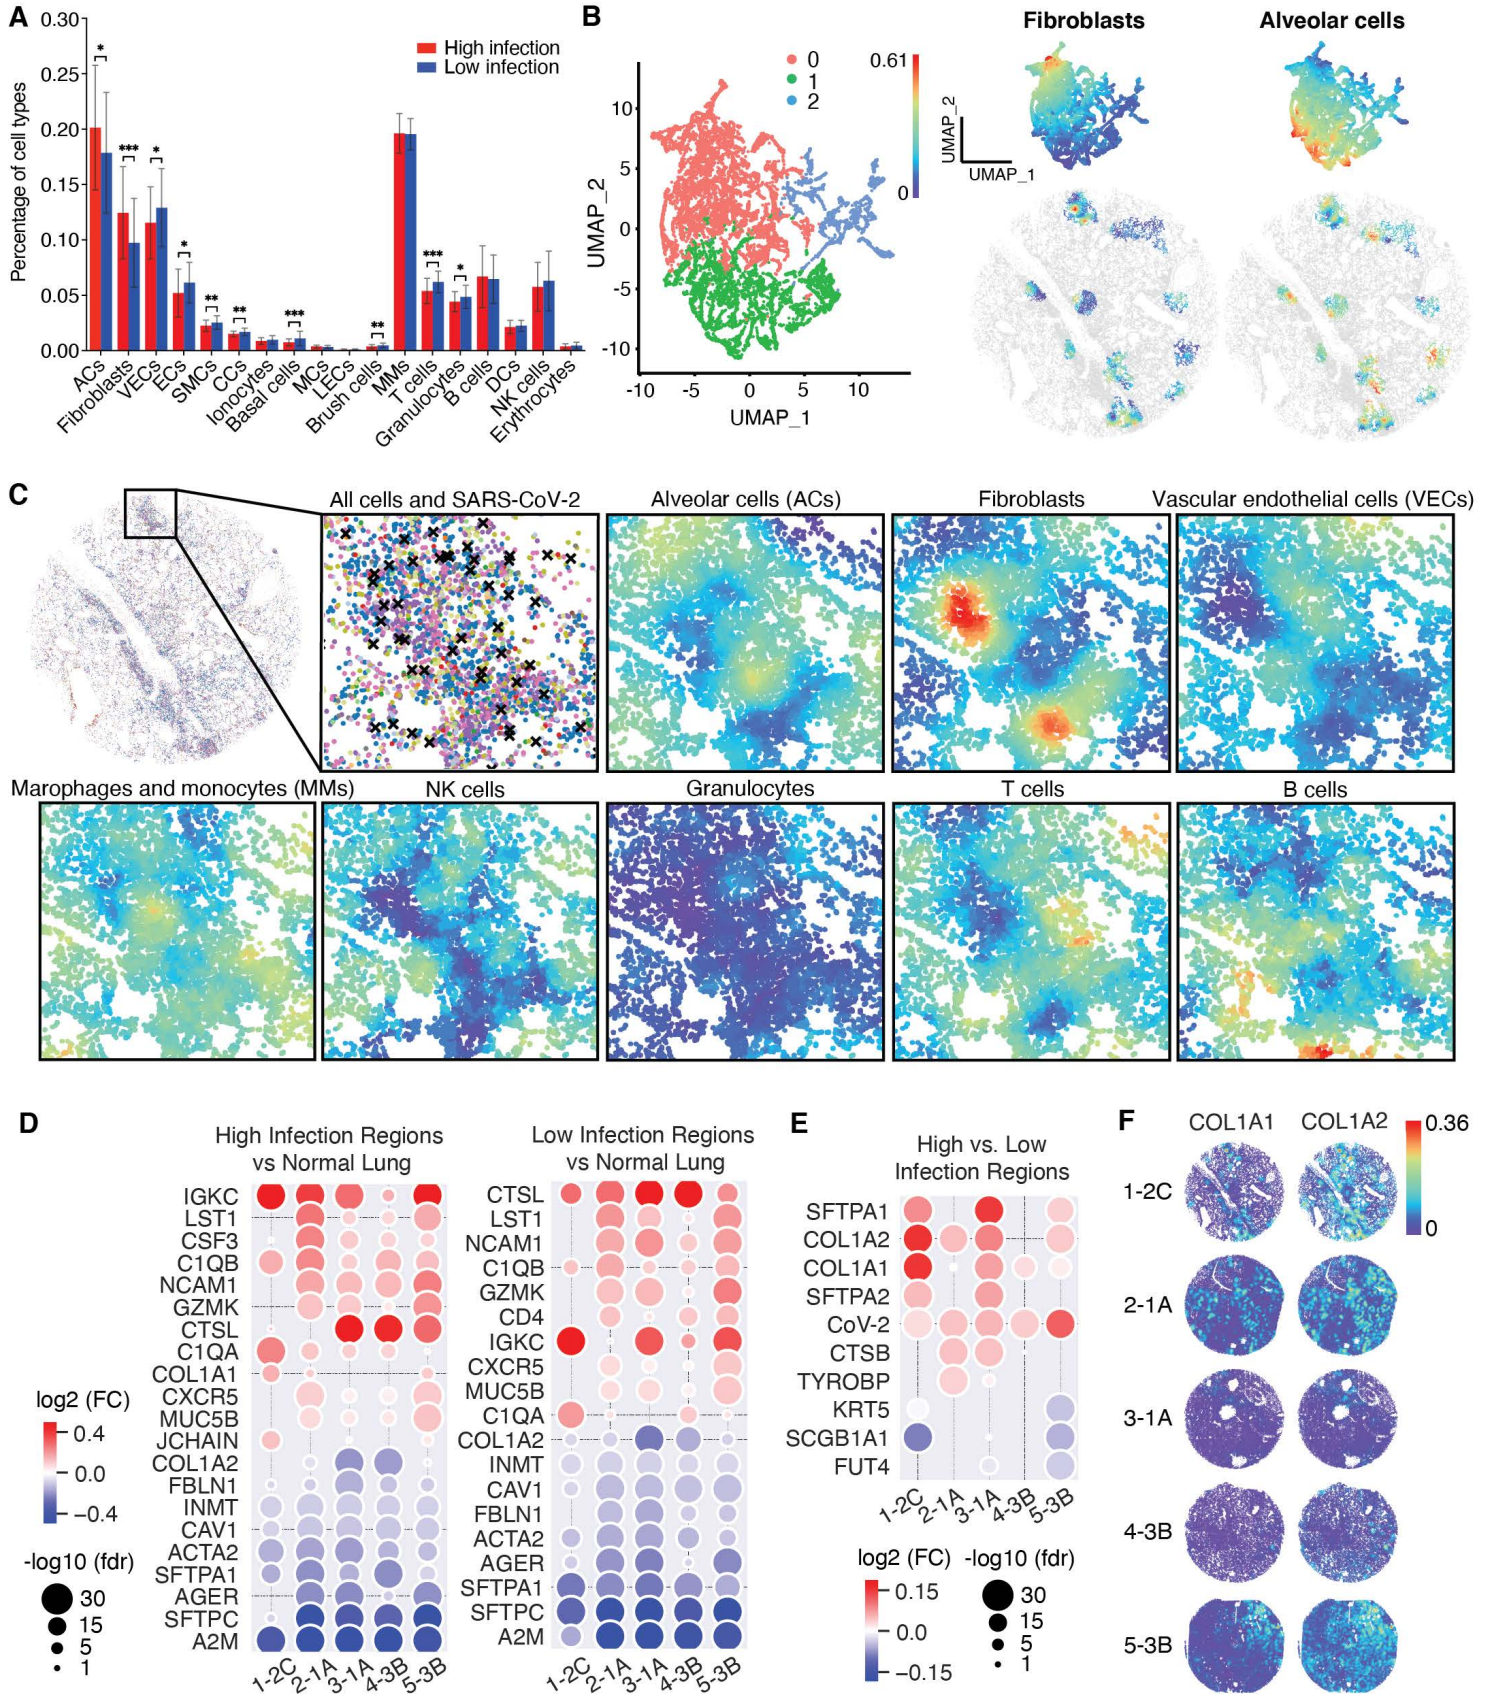



**Figure 5**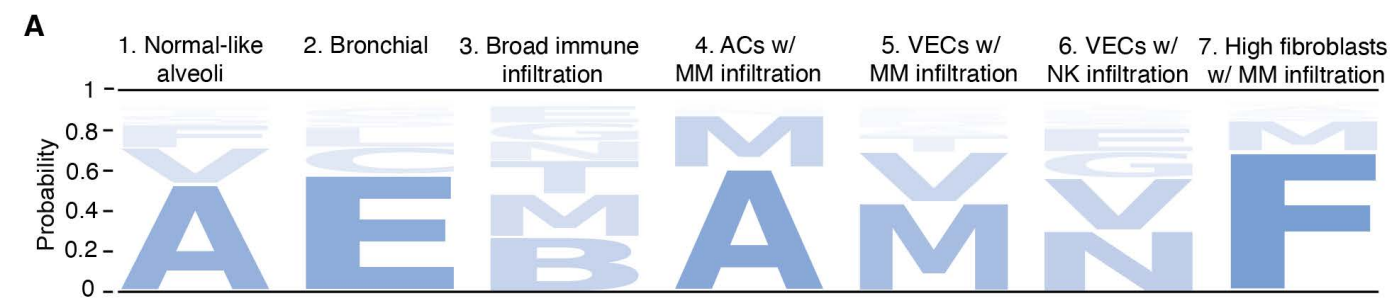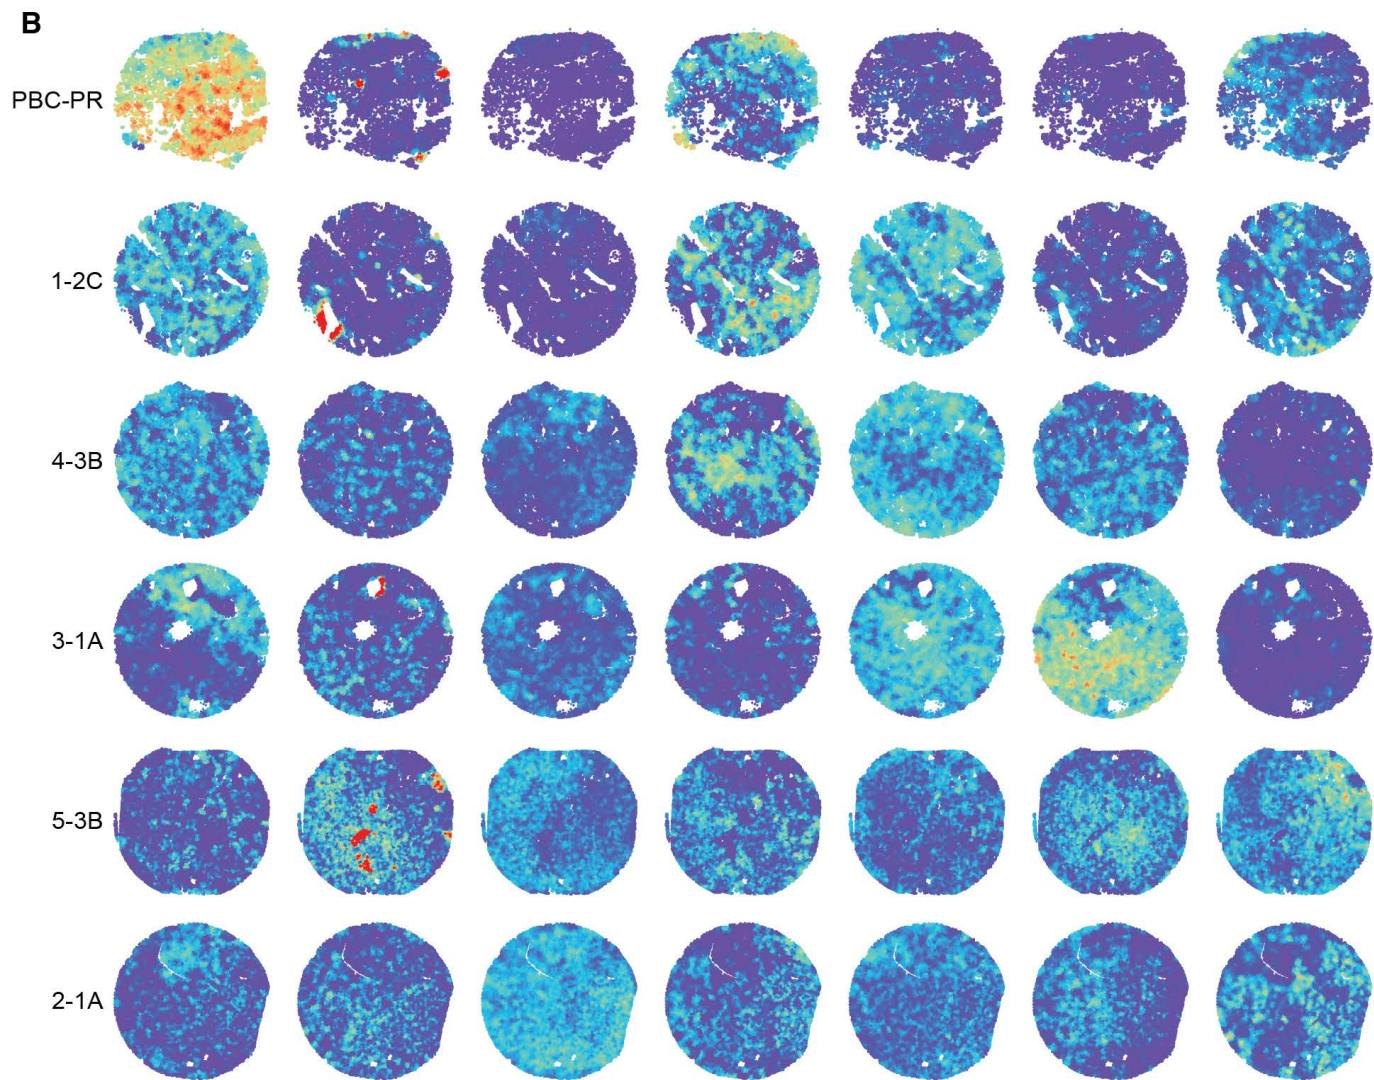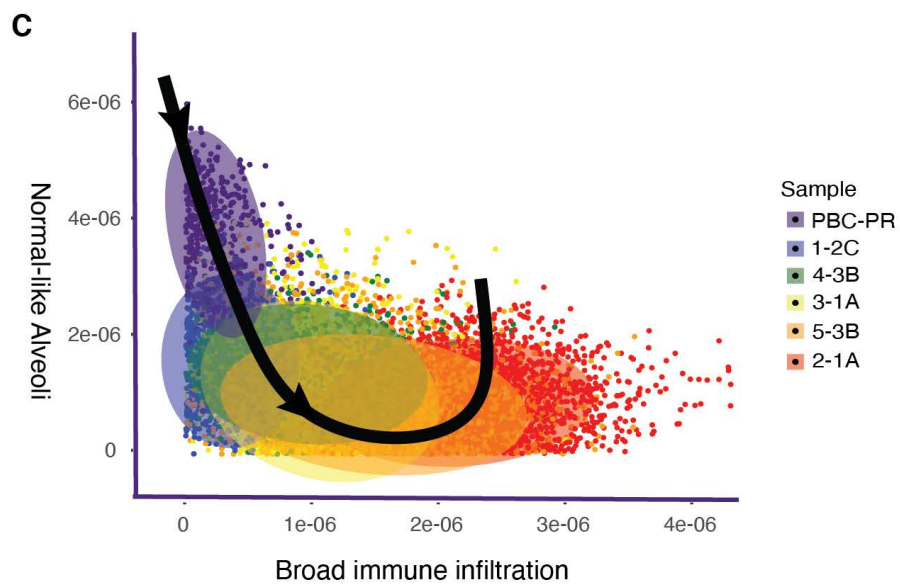



**Figure 6**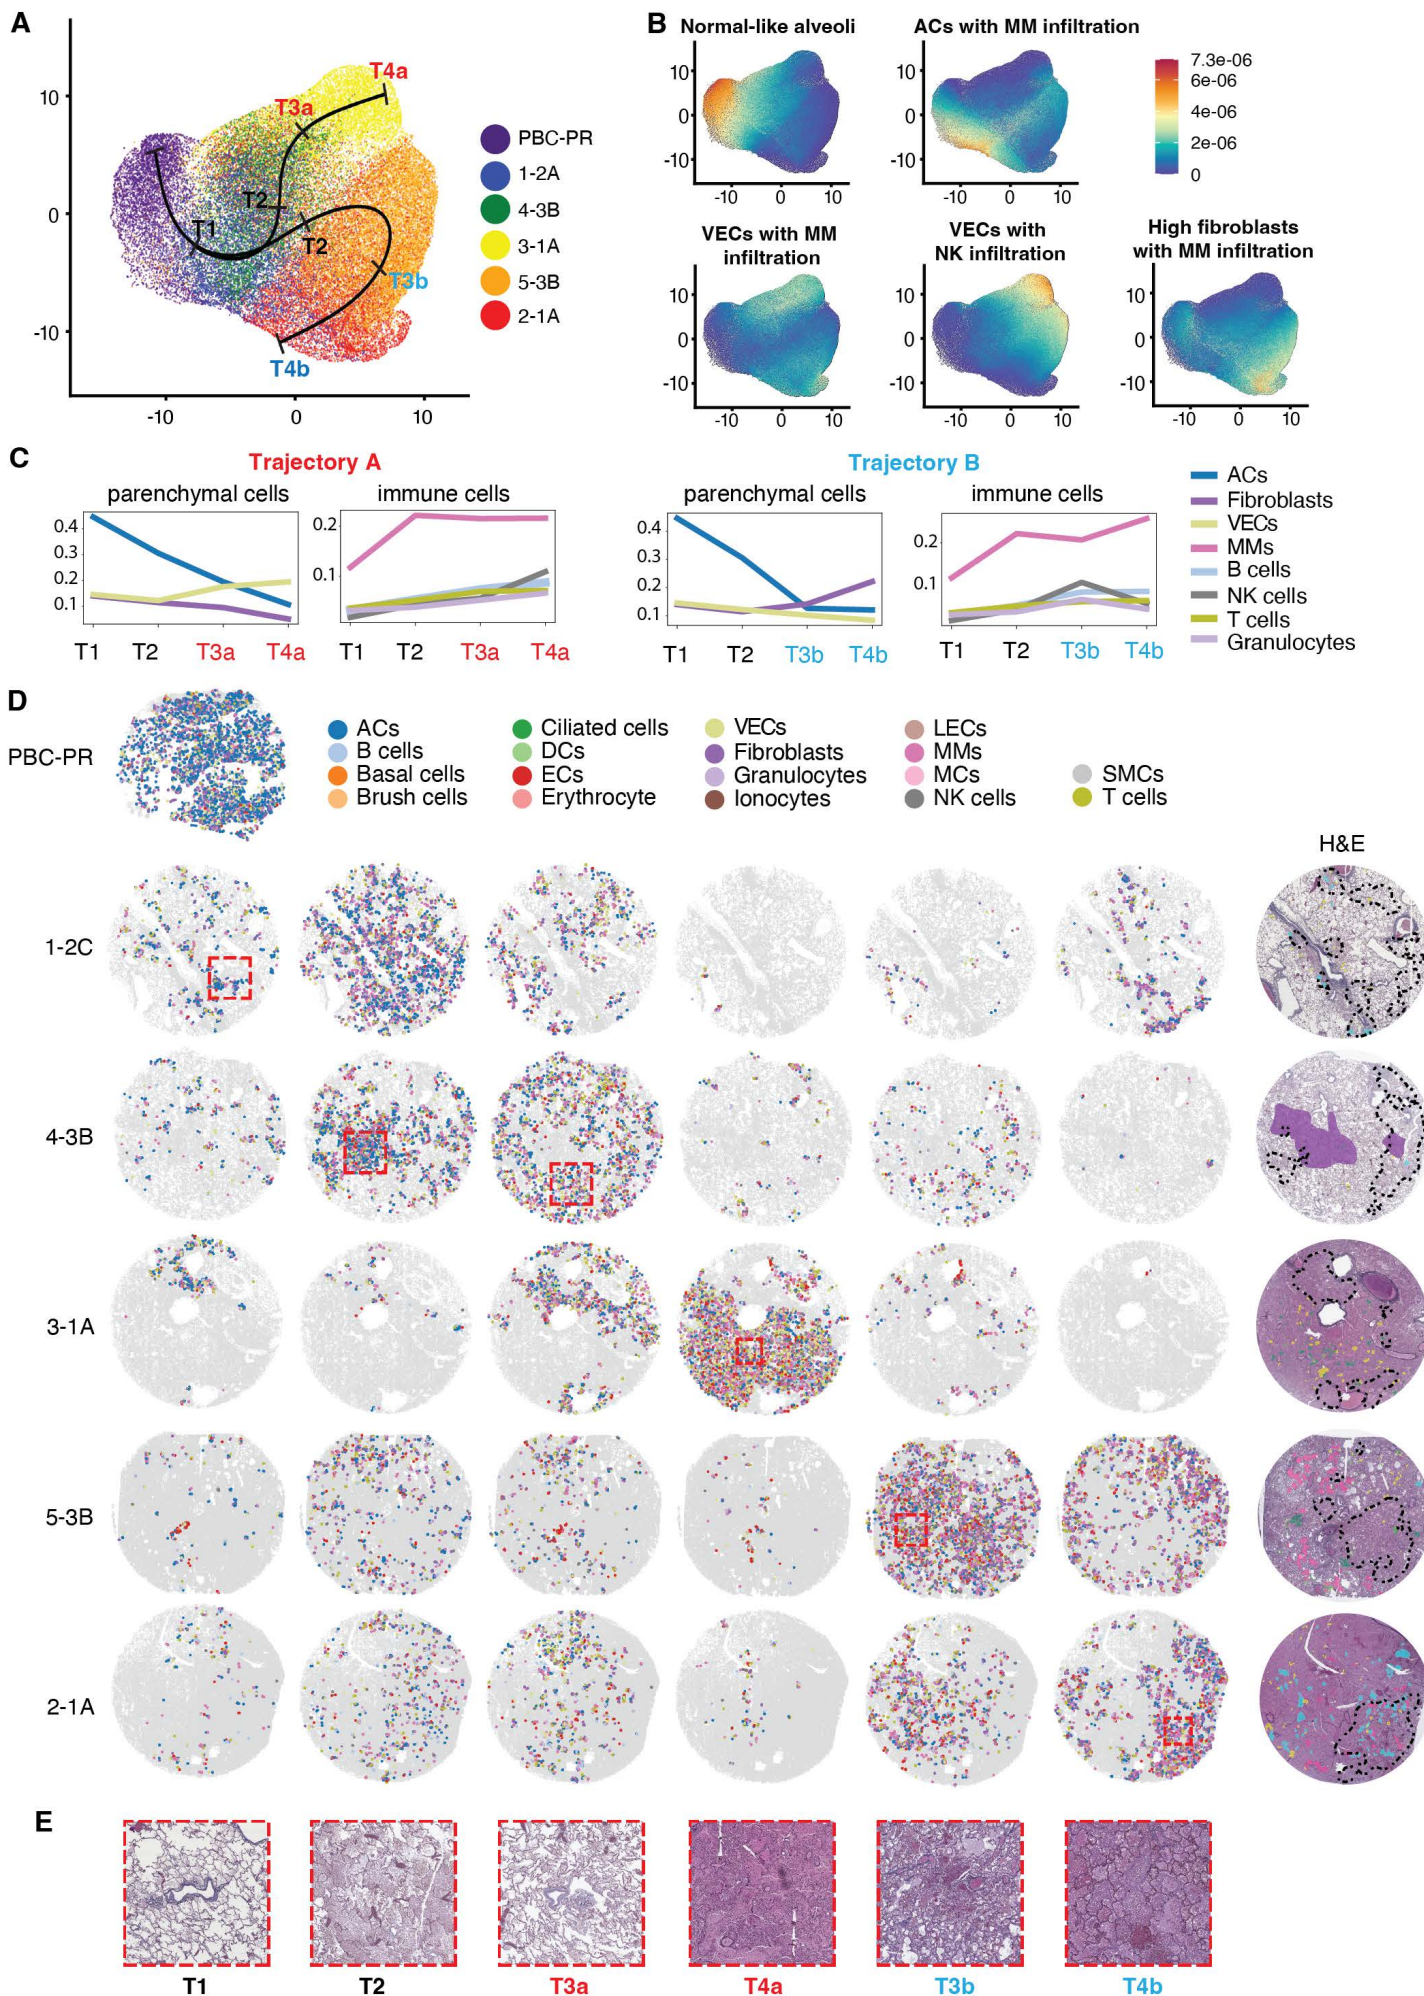







Figure S1

1-2C

3-1A

5-3B

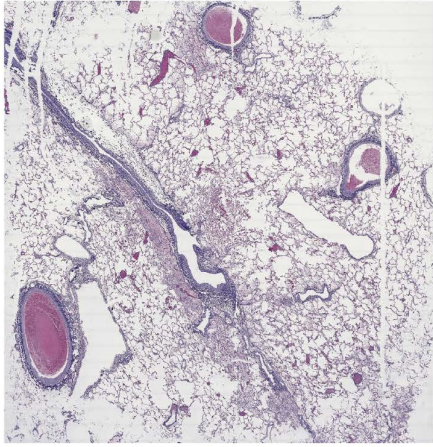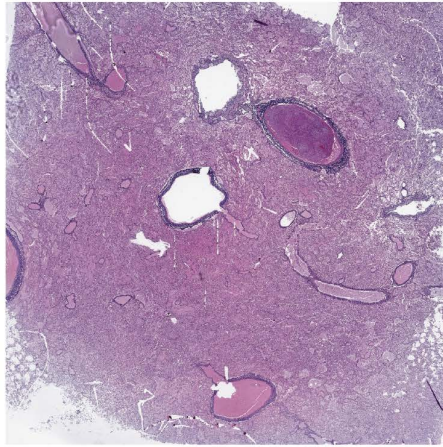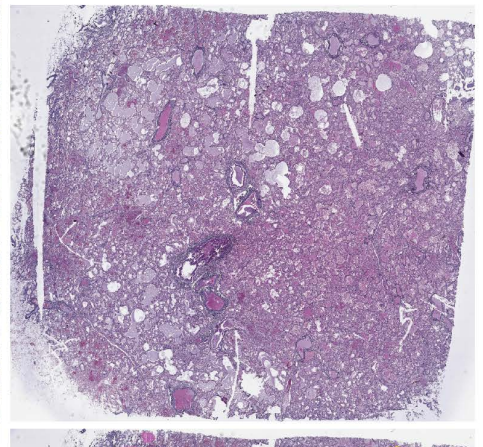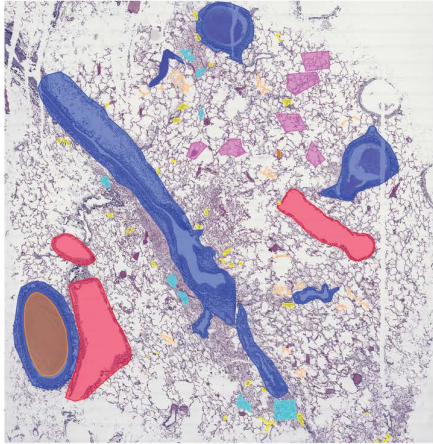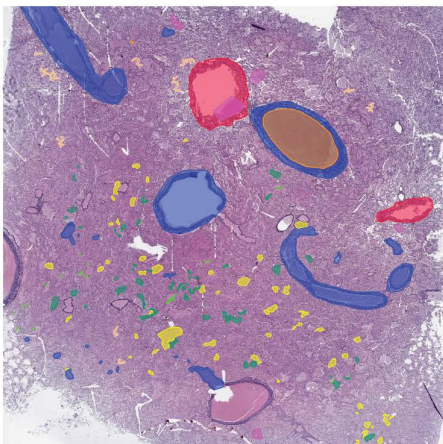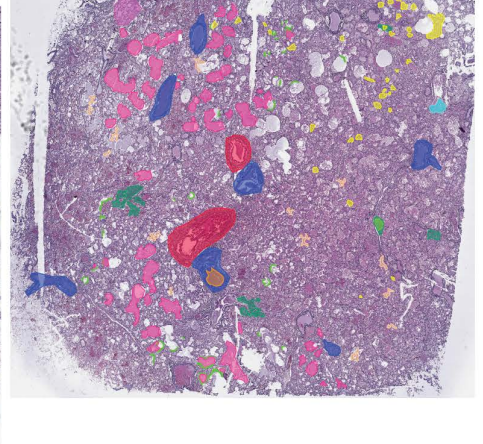

2-1A

4-3B

PBC-PR

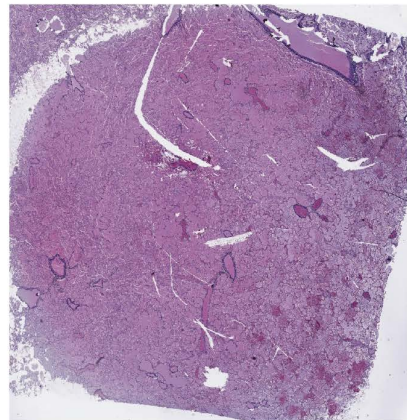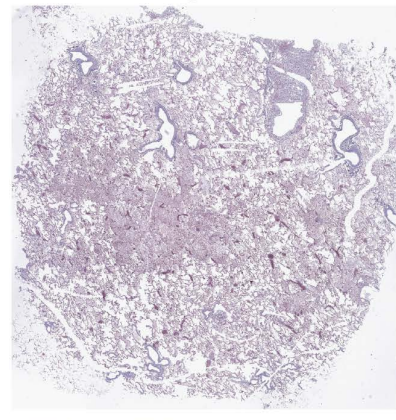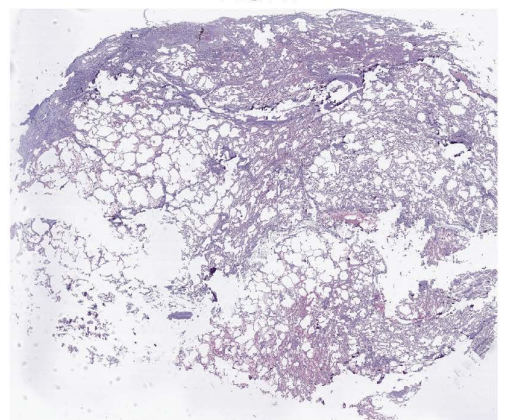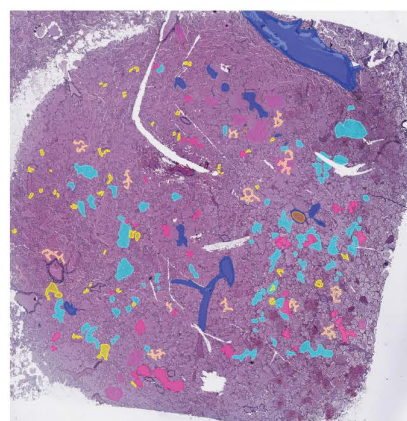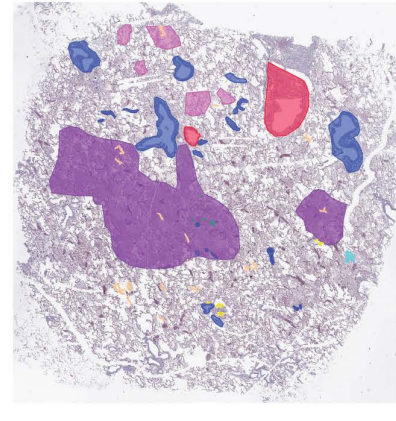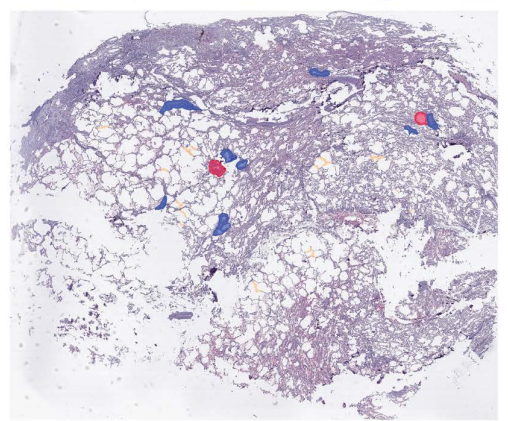

- Red: Bronchiole
- Pink: Edema
- Green: Fibrin
- Light Green: Hyaline Membrane

- Yellow: Lymphocytic Infiltration
- Purple: Blood-Immune Cell Infiltration
- Cyan: Organizing Pneumonia
- Orange: Thromboembolism

- Blue: Vessel
- Brown: Alveolar Wall
- Light Pink: Less Damage



Figure S2

1-2C

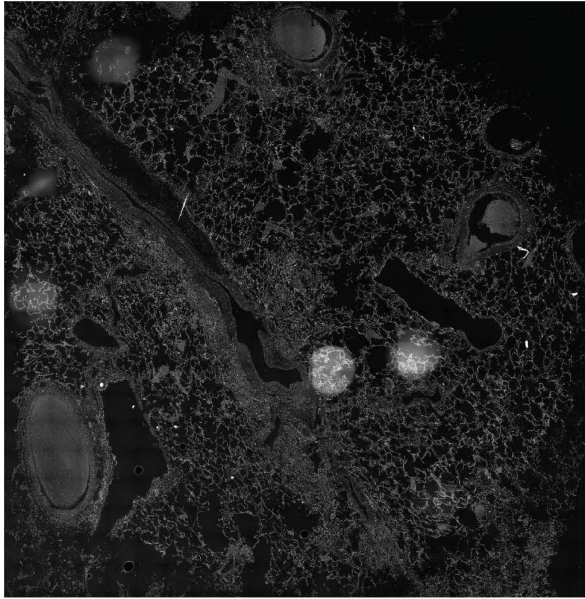

2-1A

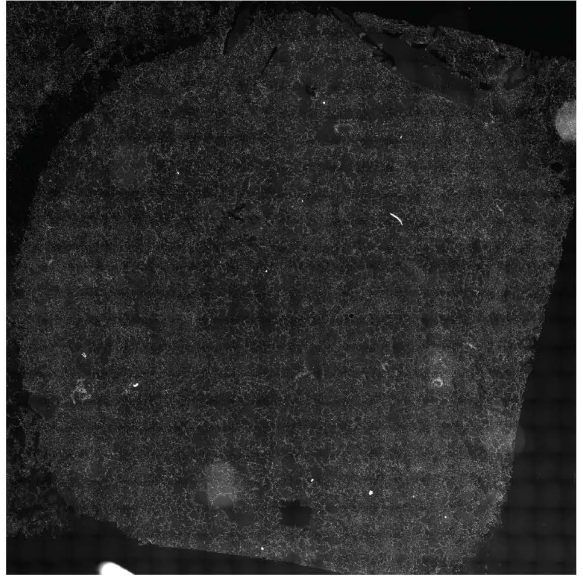

3-1A

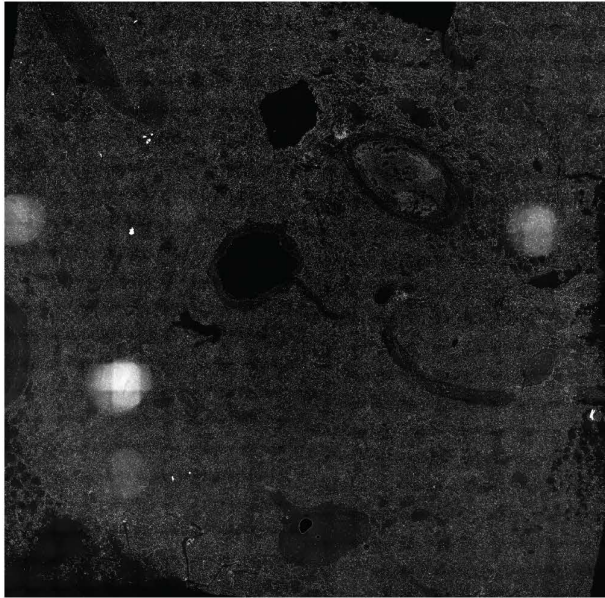

4-3B

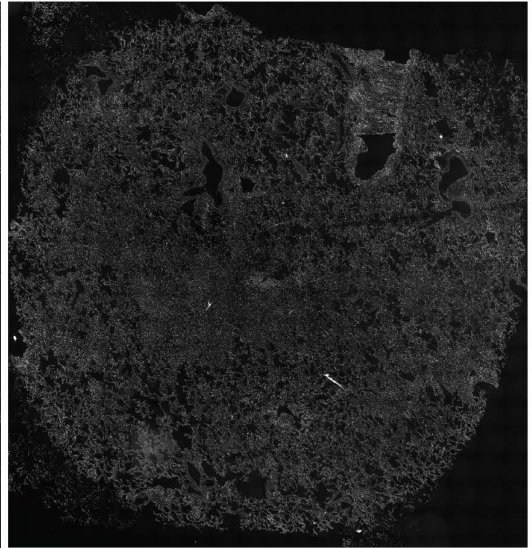

5-3B

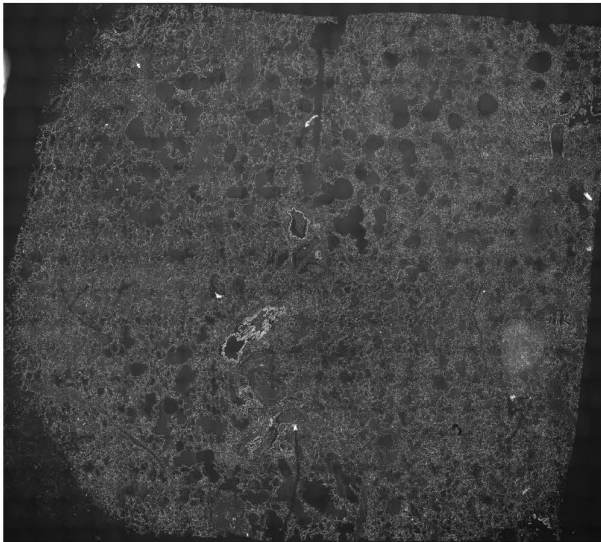

PBC-PR

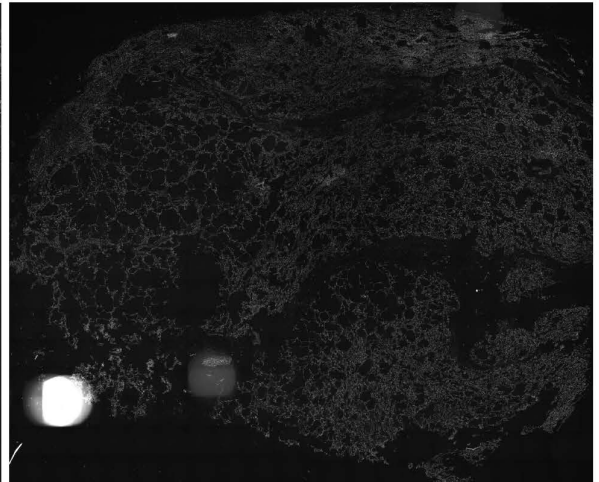

**Figure S3**

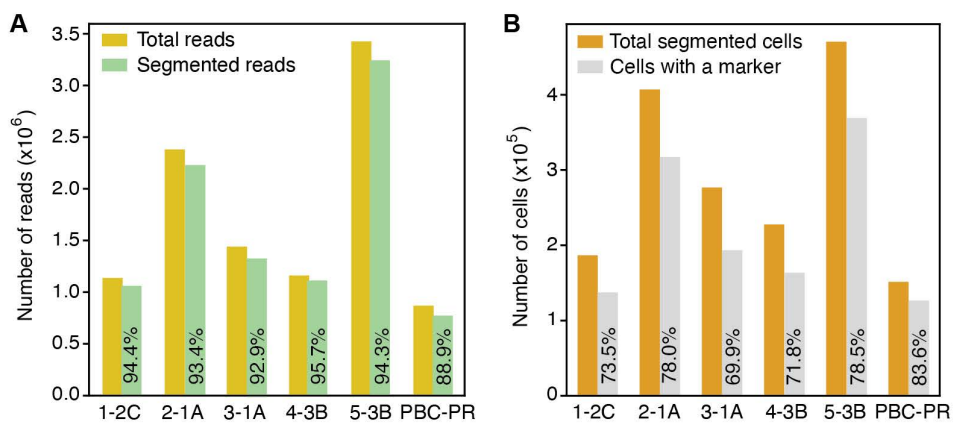

Figure S4

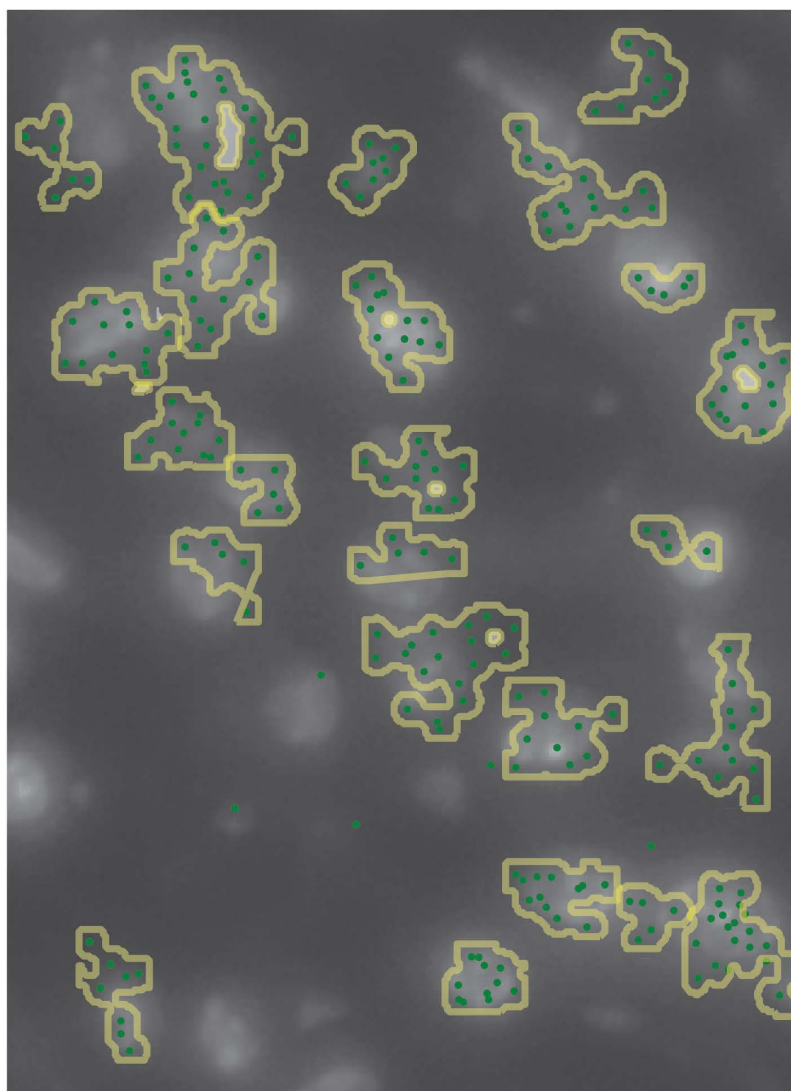

Figure S5

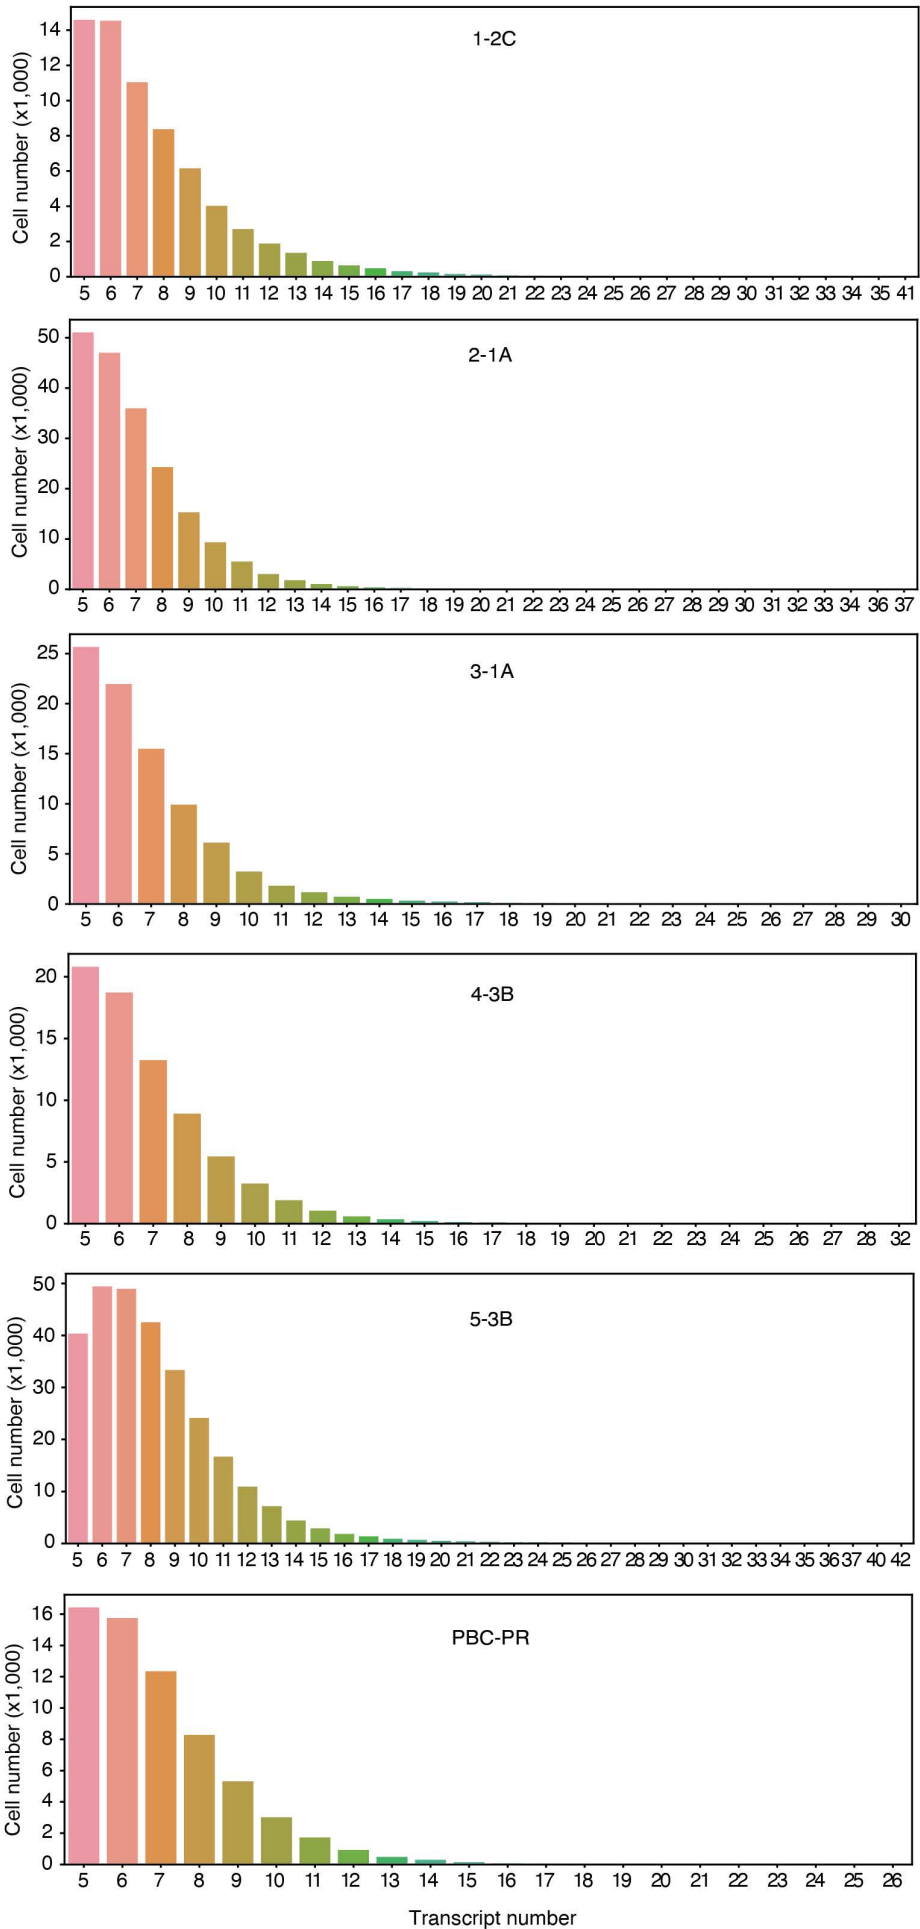



**Figure S6**

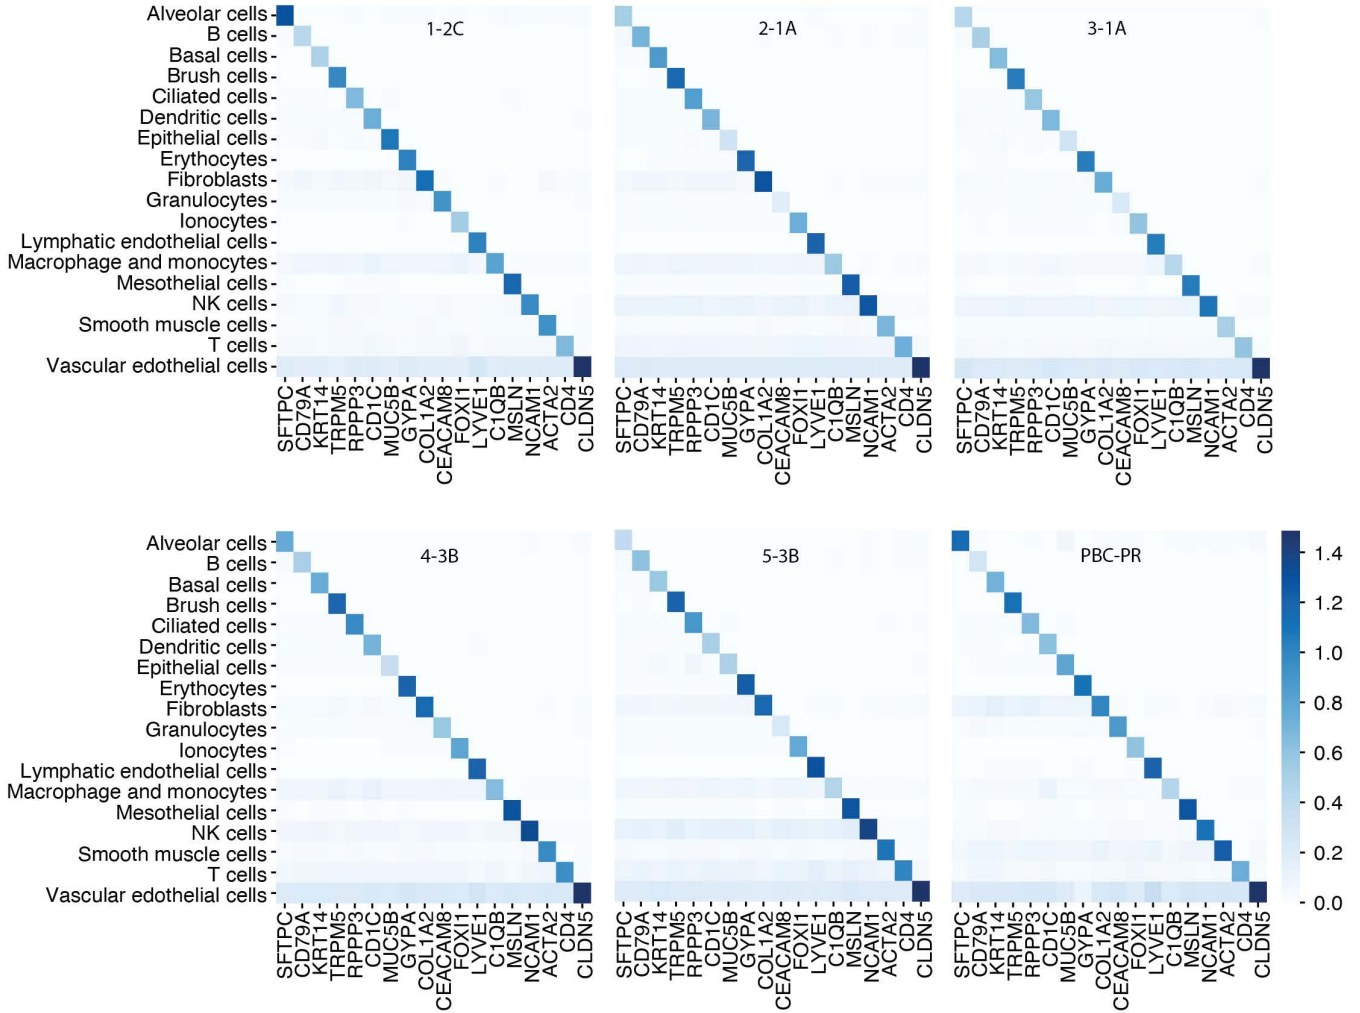

Figure S7

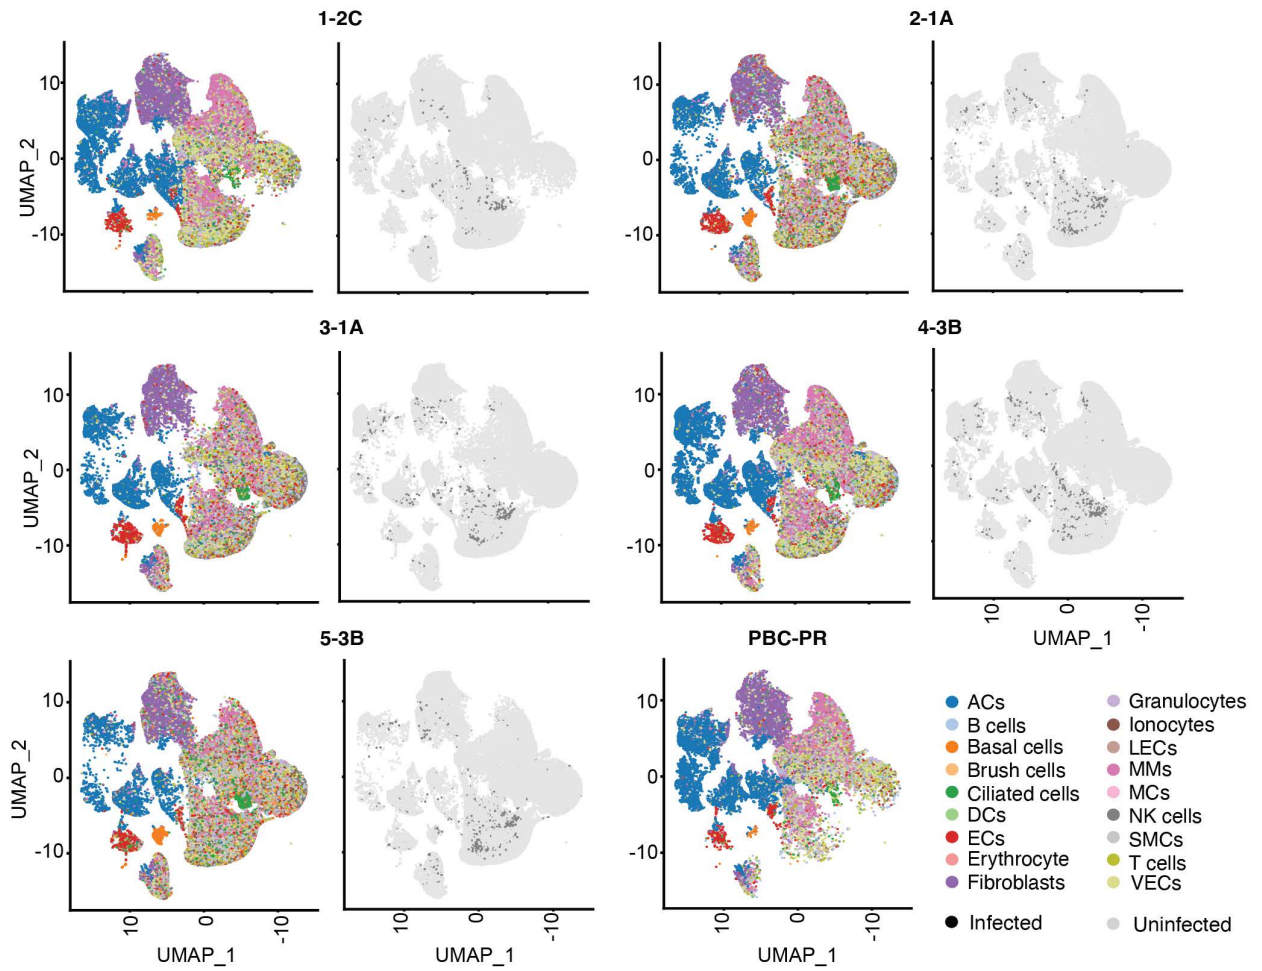

Figure S8

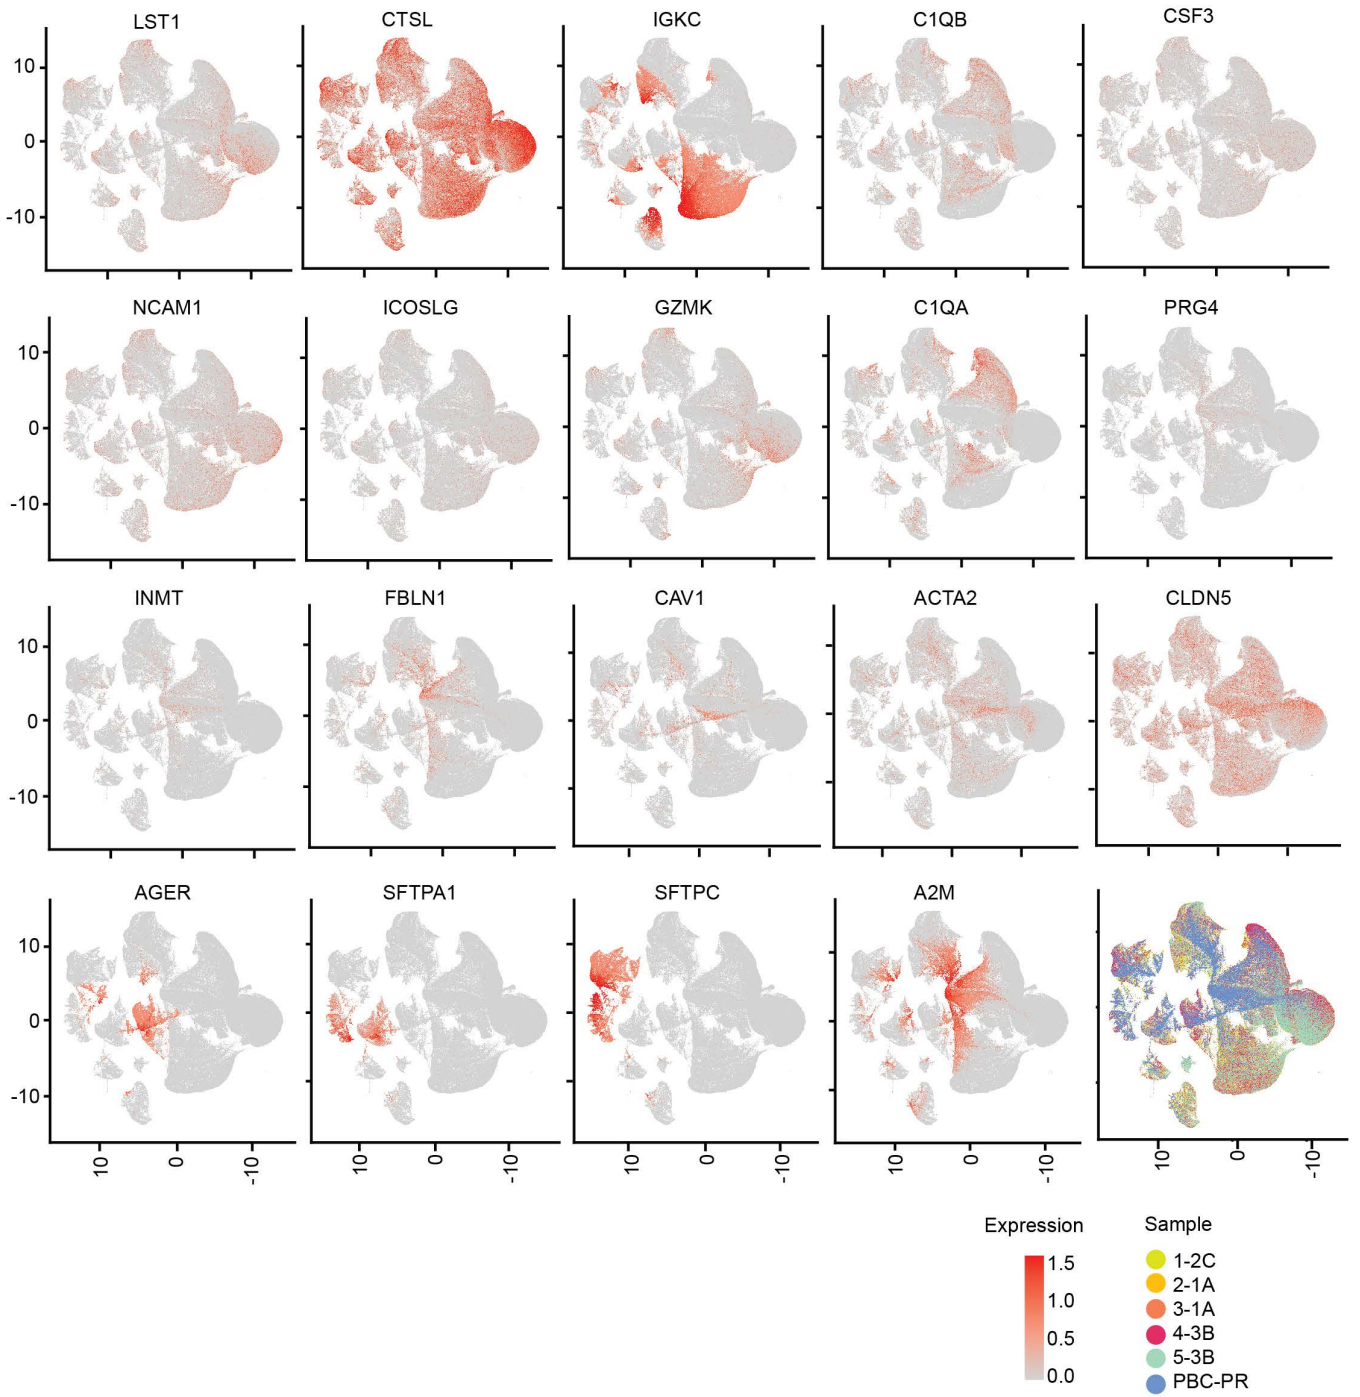



Figure S9

1-2C

2-1A

3-1A

4-3B

5-3B

PBC-PR

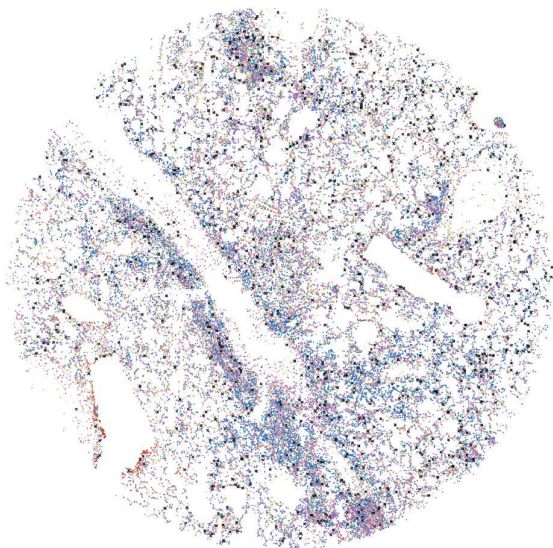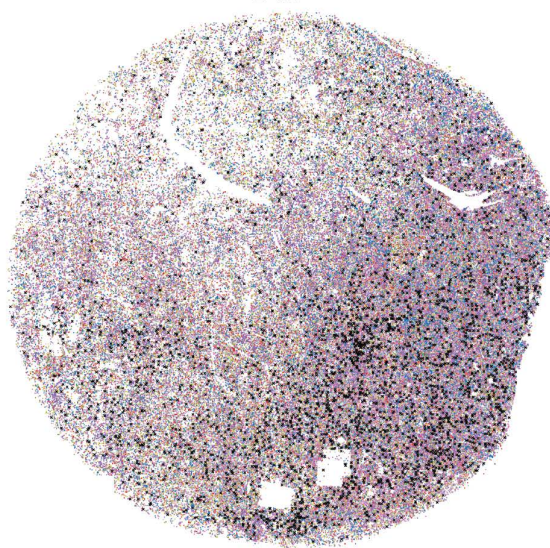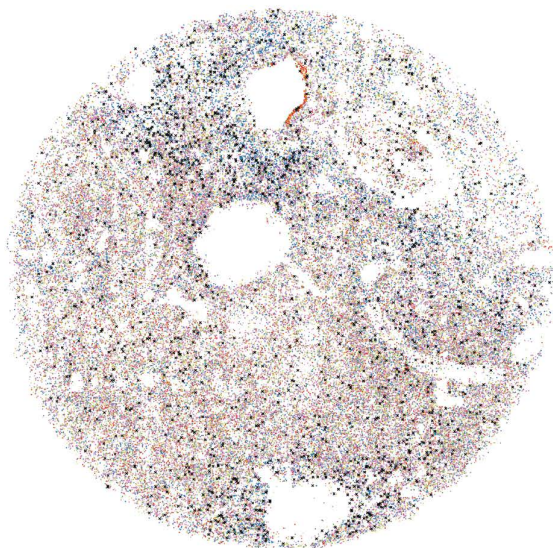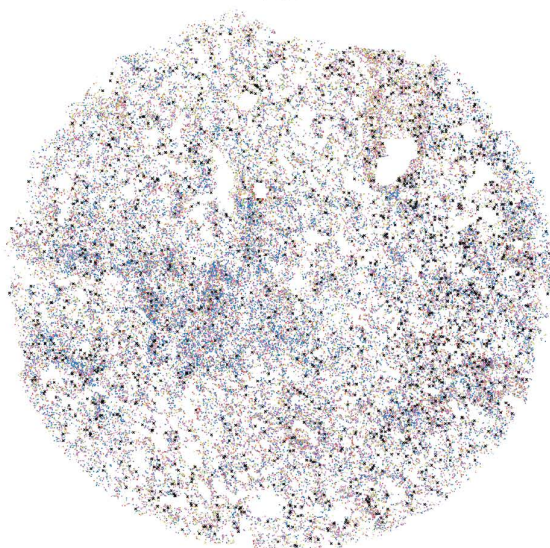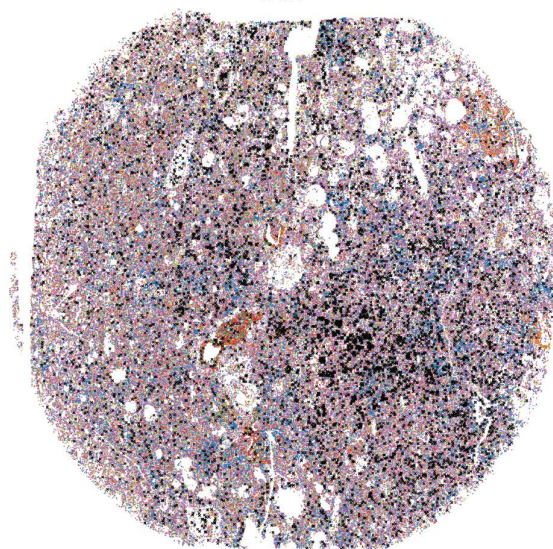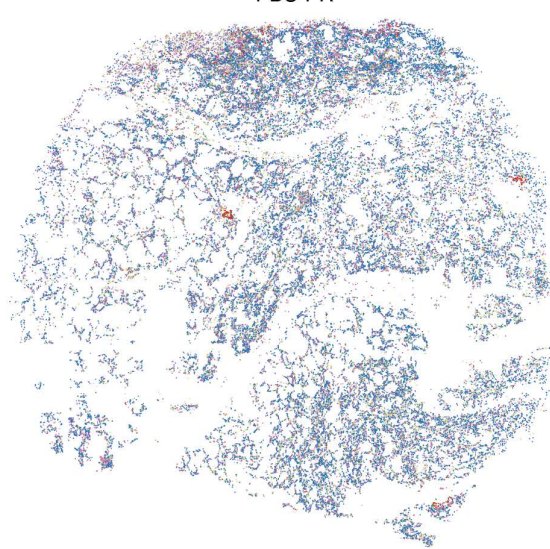

- ACs
- B cells
- Basal cells
- Brush cells
- Ciliated cells
- DCs
- ECs
- Erythrocyte
- Fibroblasts
- Granulocytes
- Icnocytes
- LECs
- MMs
- MCs
- NK cells
- SMCs
- T cells
- VECs
- X SARS-CoV-2



**Figure S10 - Sample 1-2C Spatial Map of Cell Types**

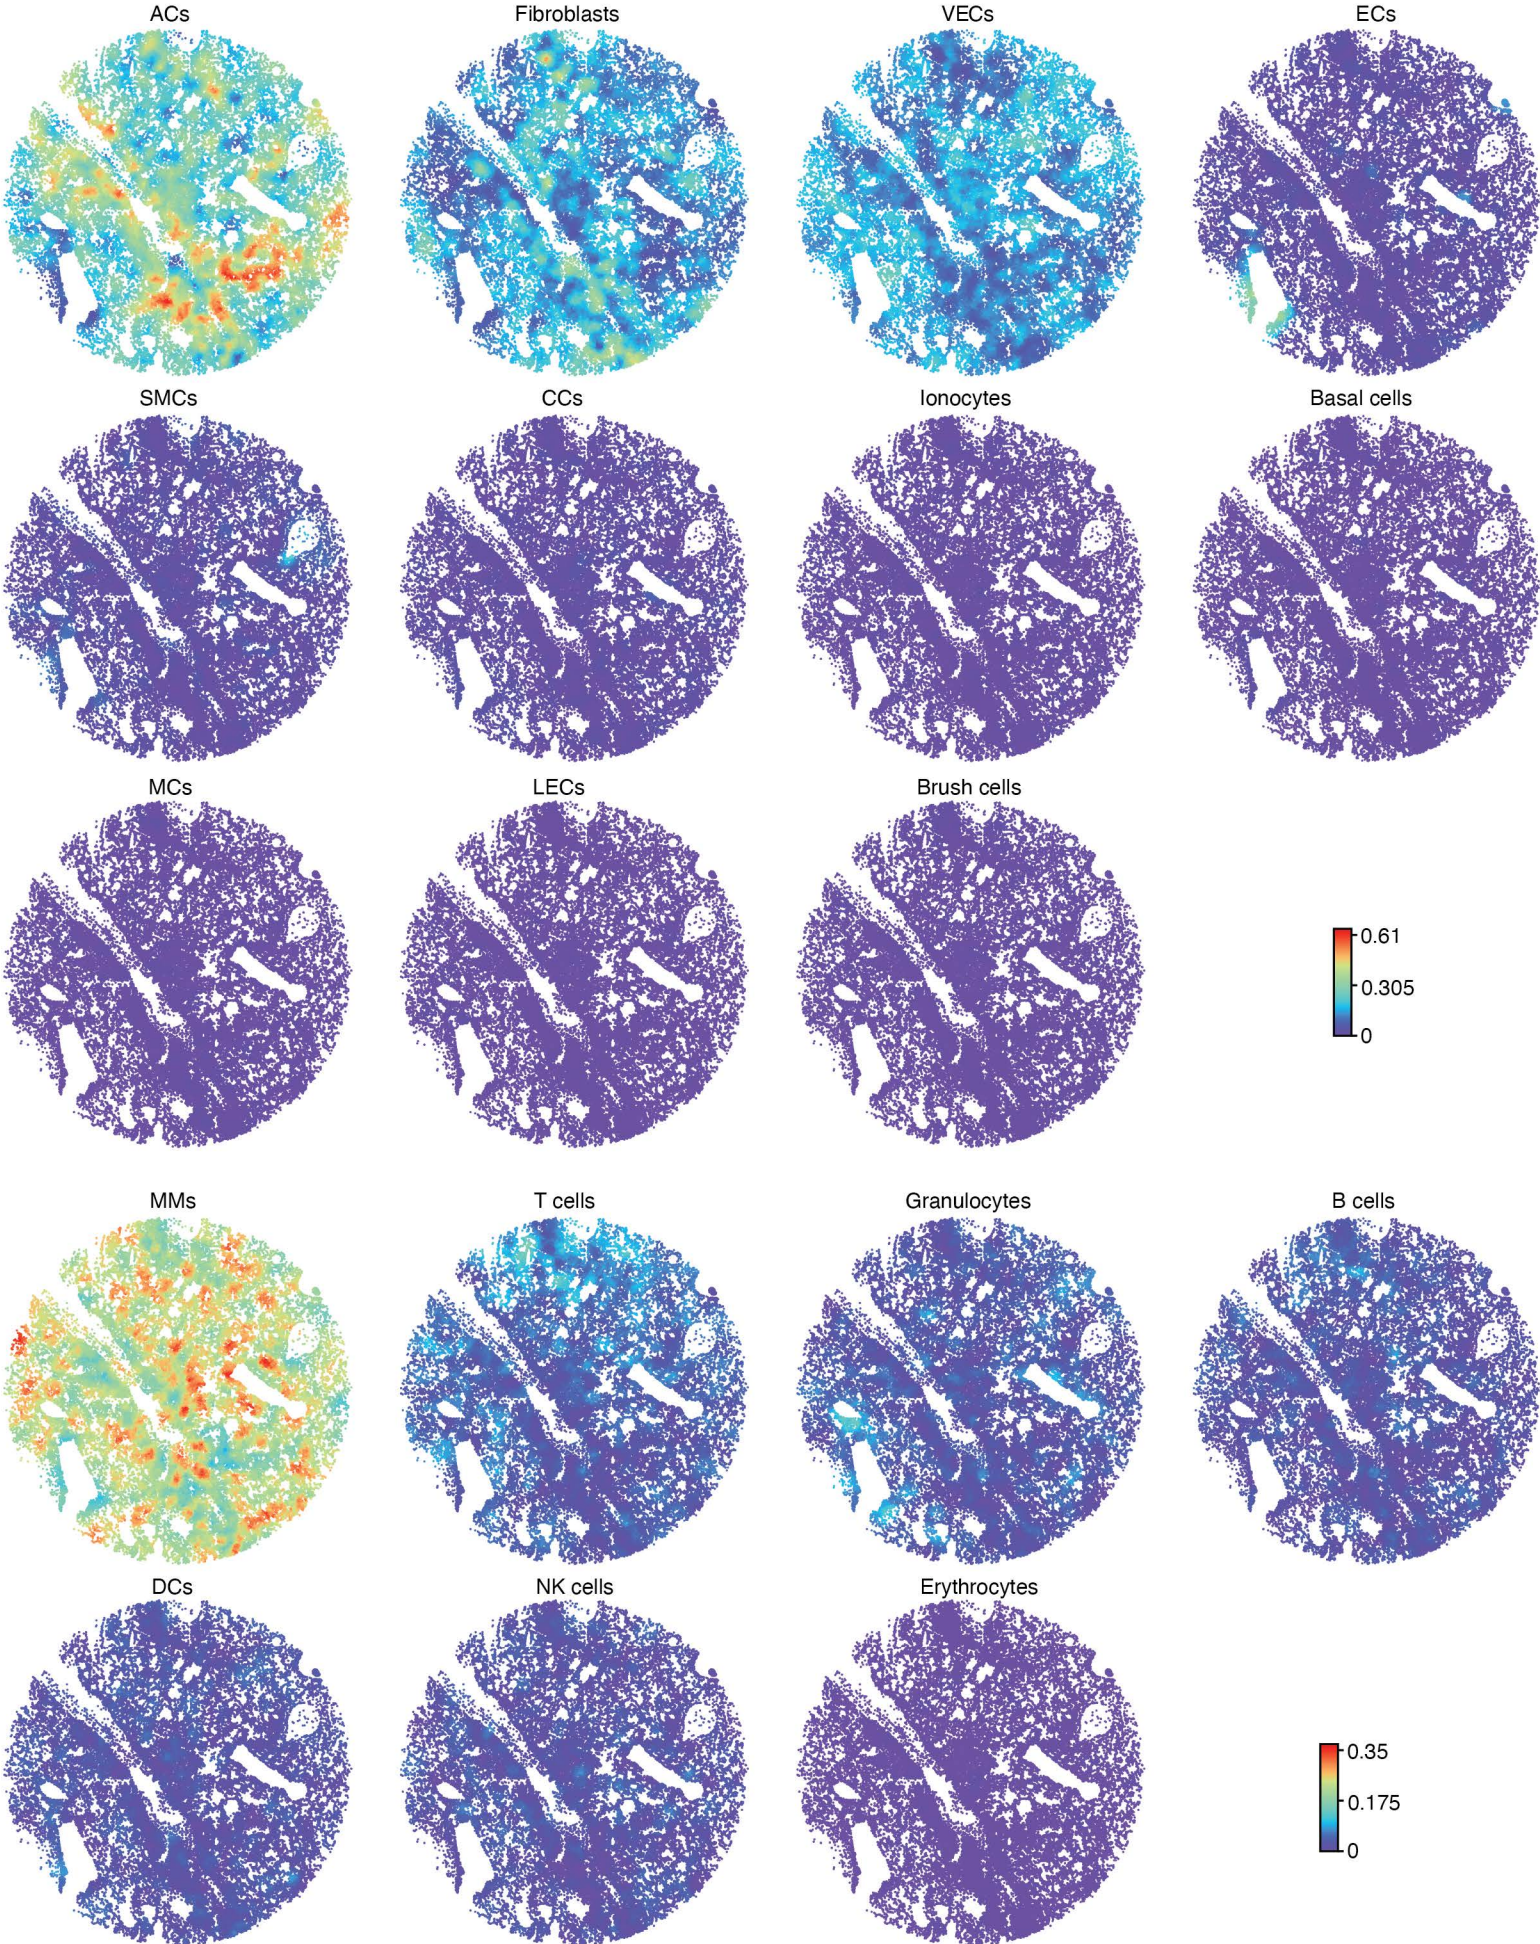



Figure S11 - Sample 2-1A Spatial Map of Cell Types

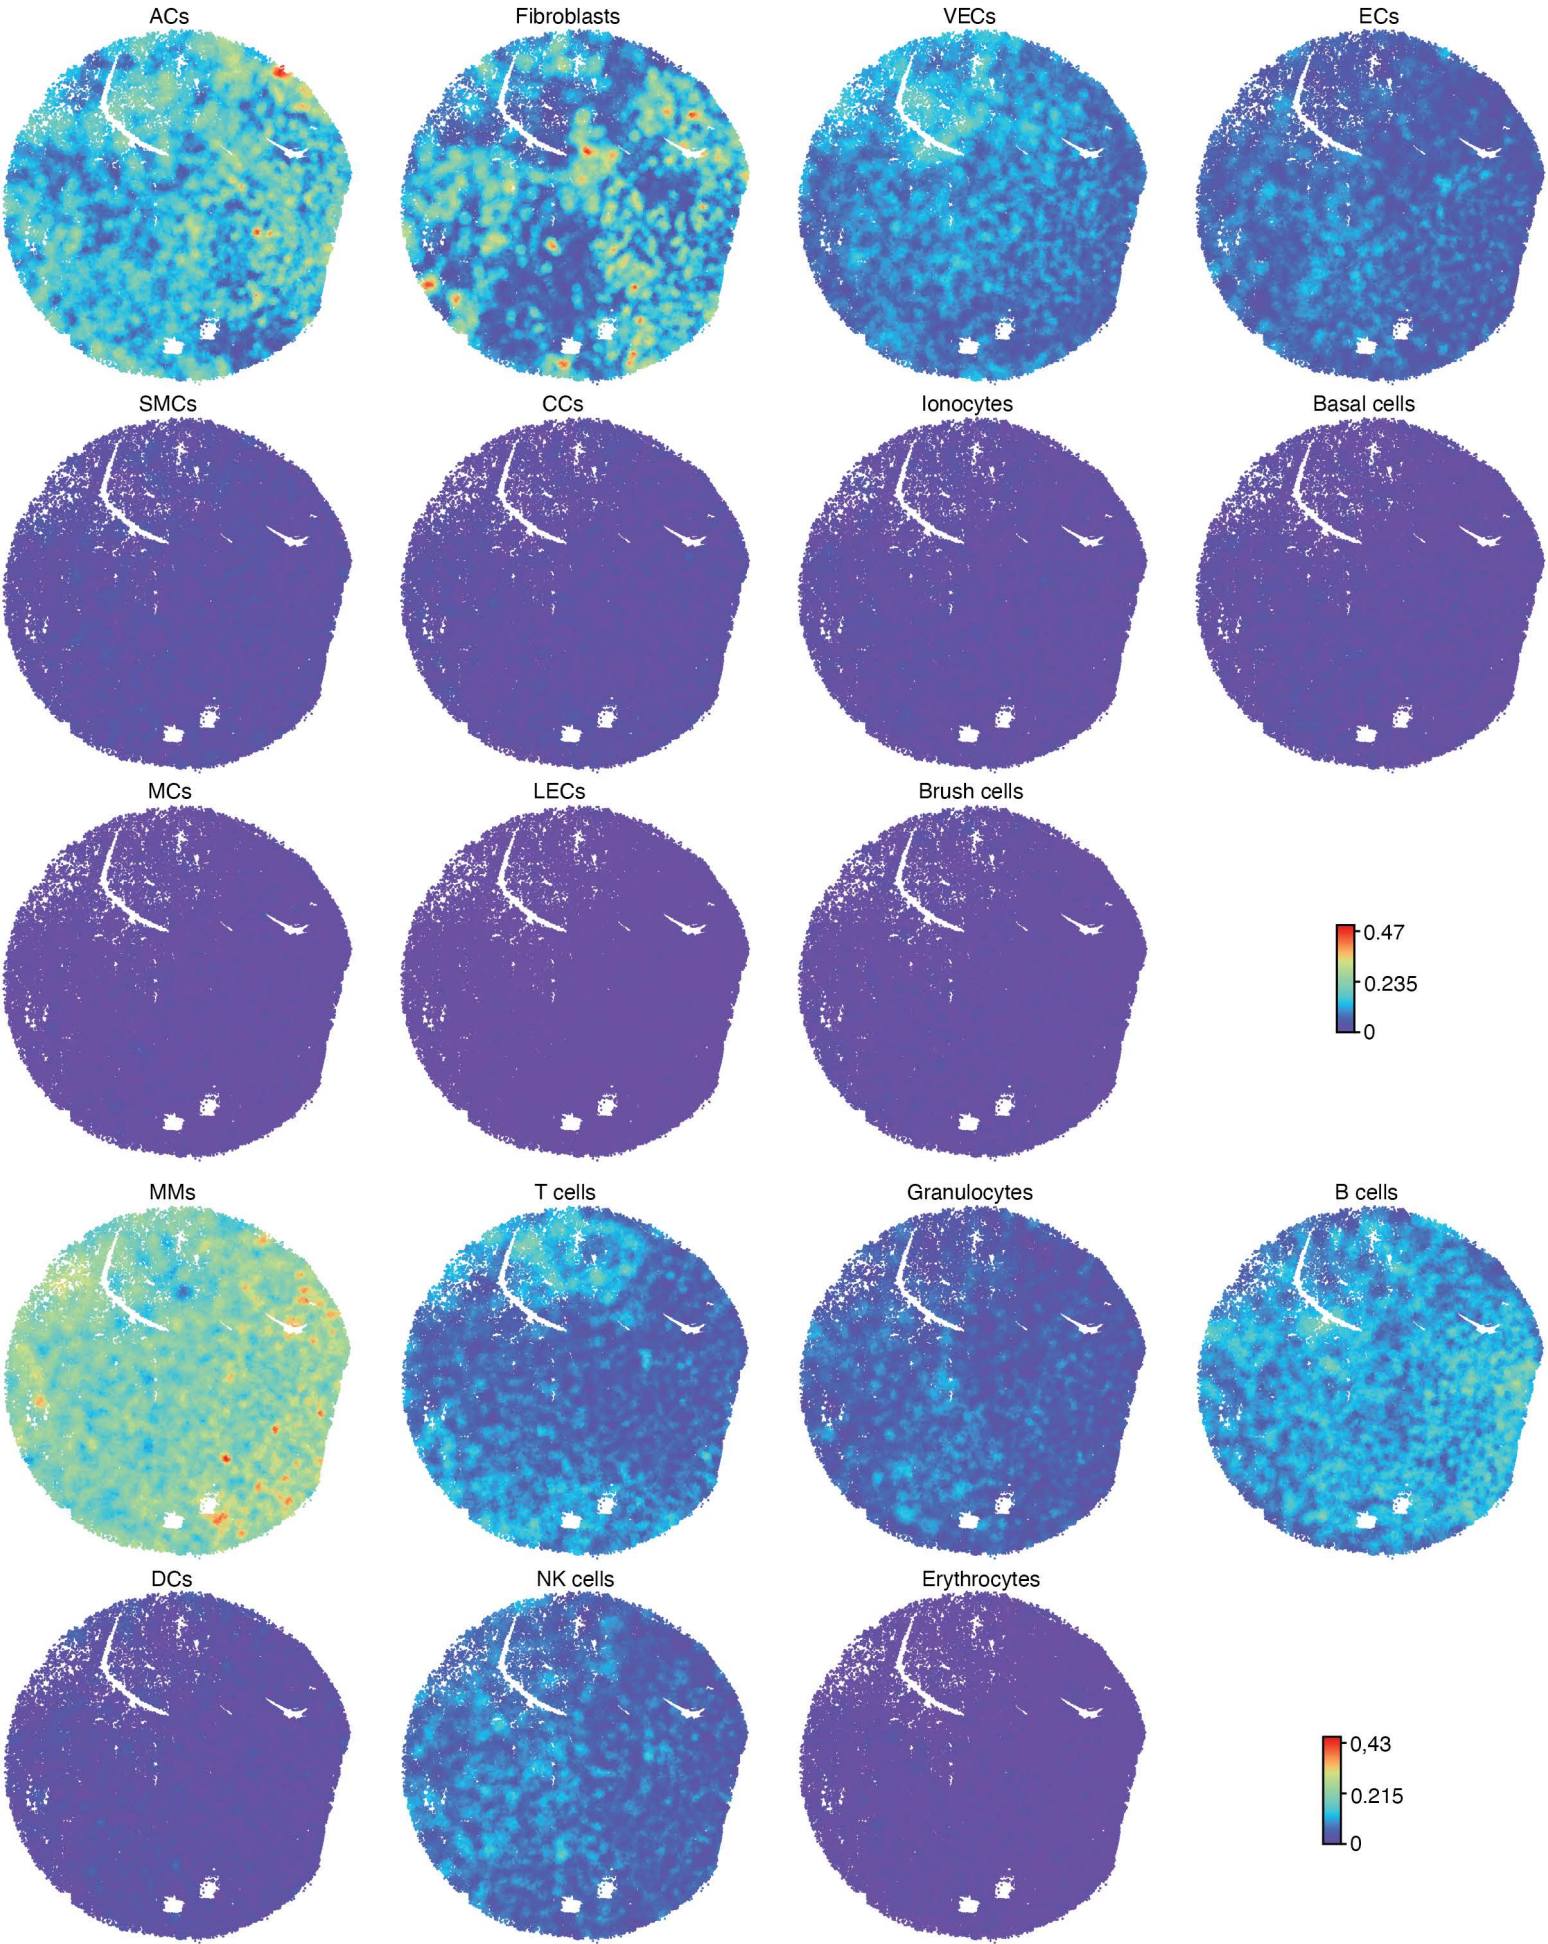



Figure S12 - Sample 3-1A Spatial Map of Cell Types

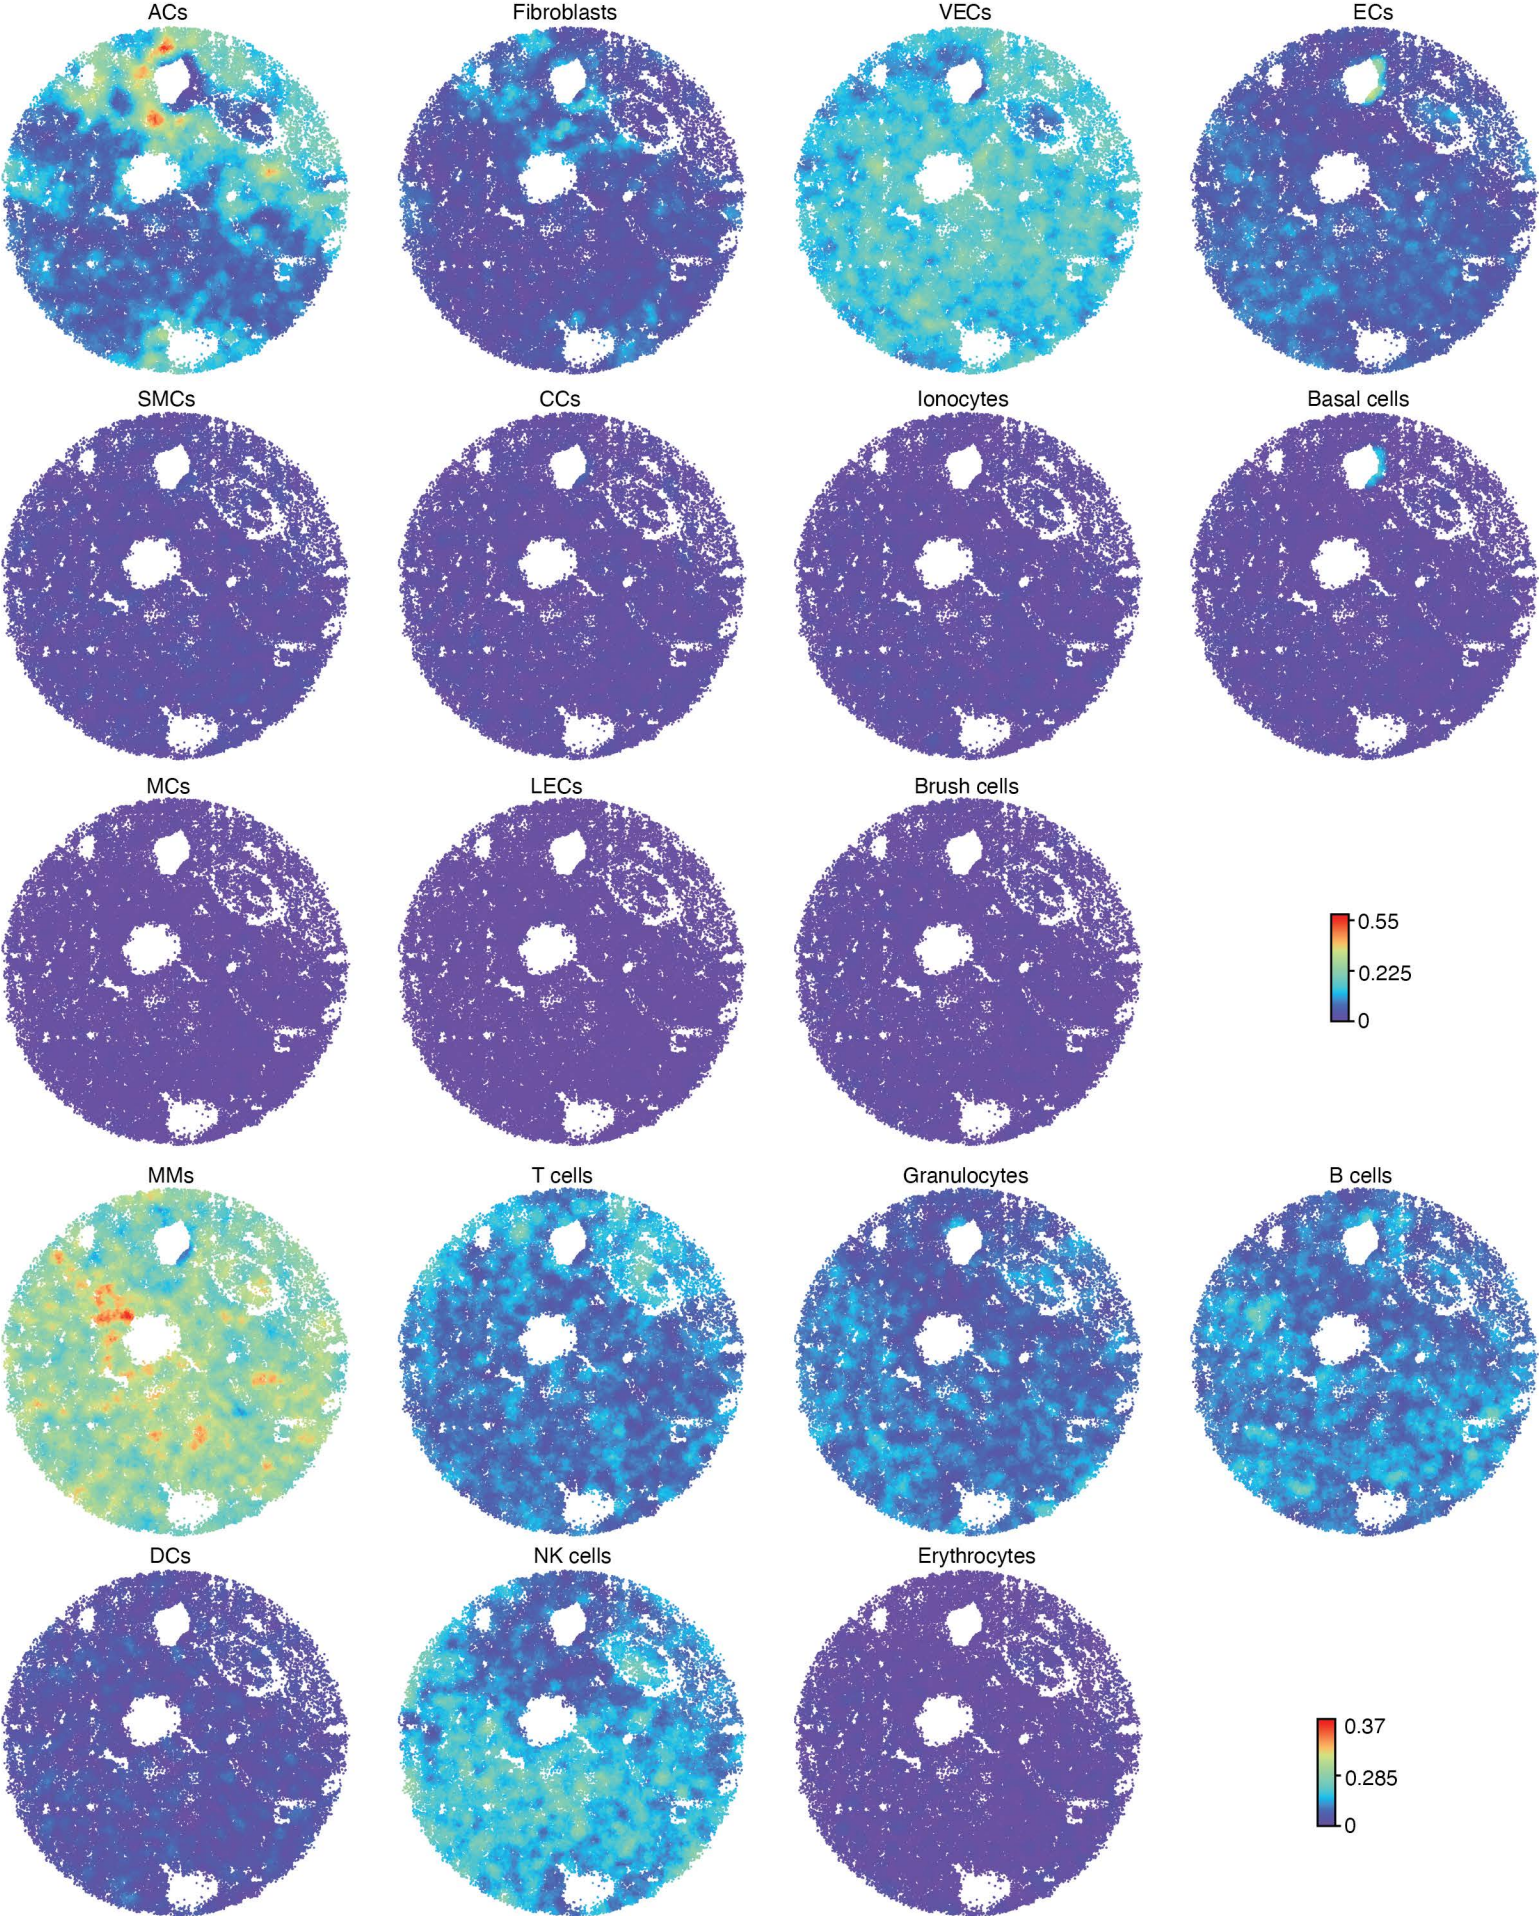



**Figure S13 - Sample 4-3B Spatial Map of Cell Types**

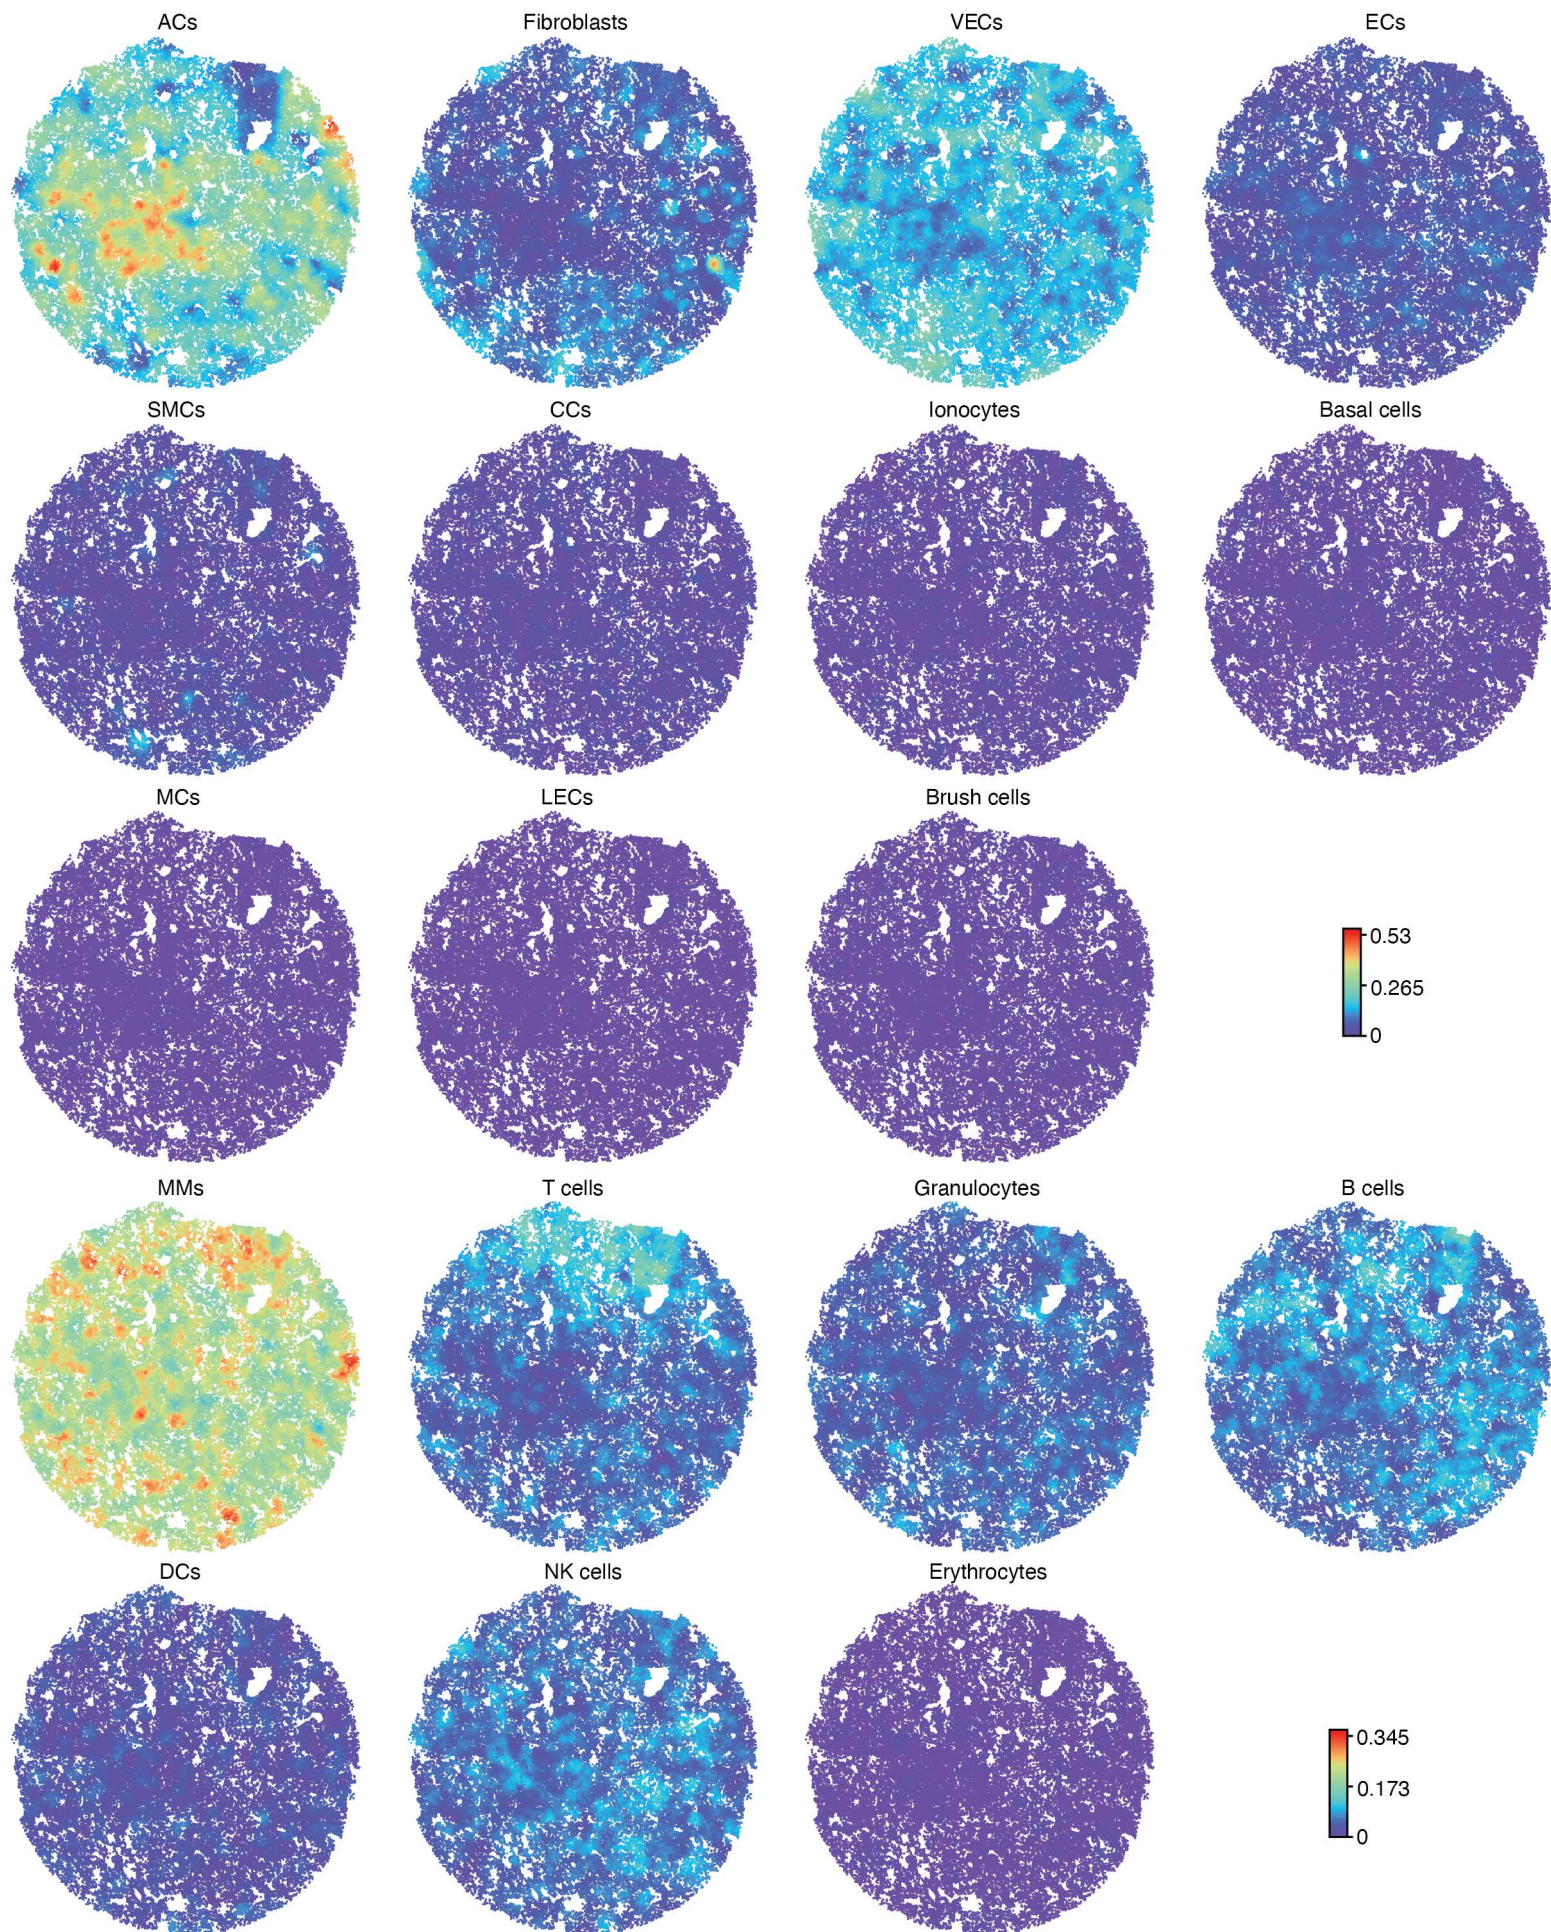



**Figure S14 - Sample 5-3B Spatial Map of Cell Types**

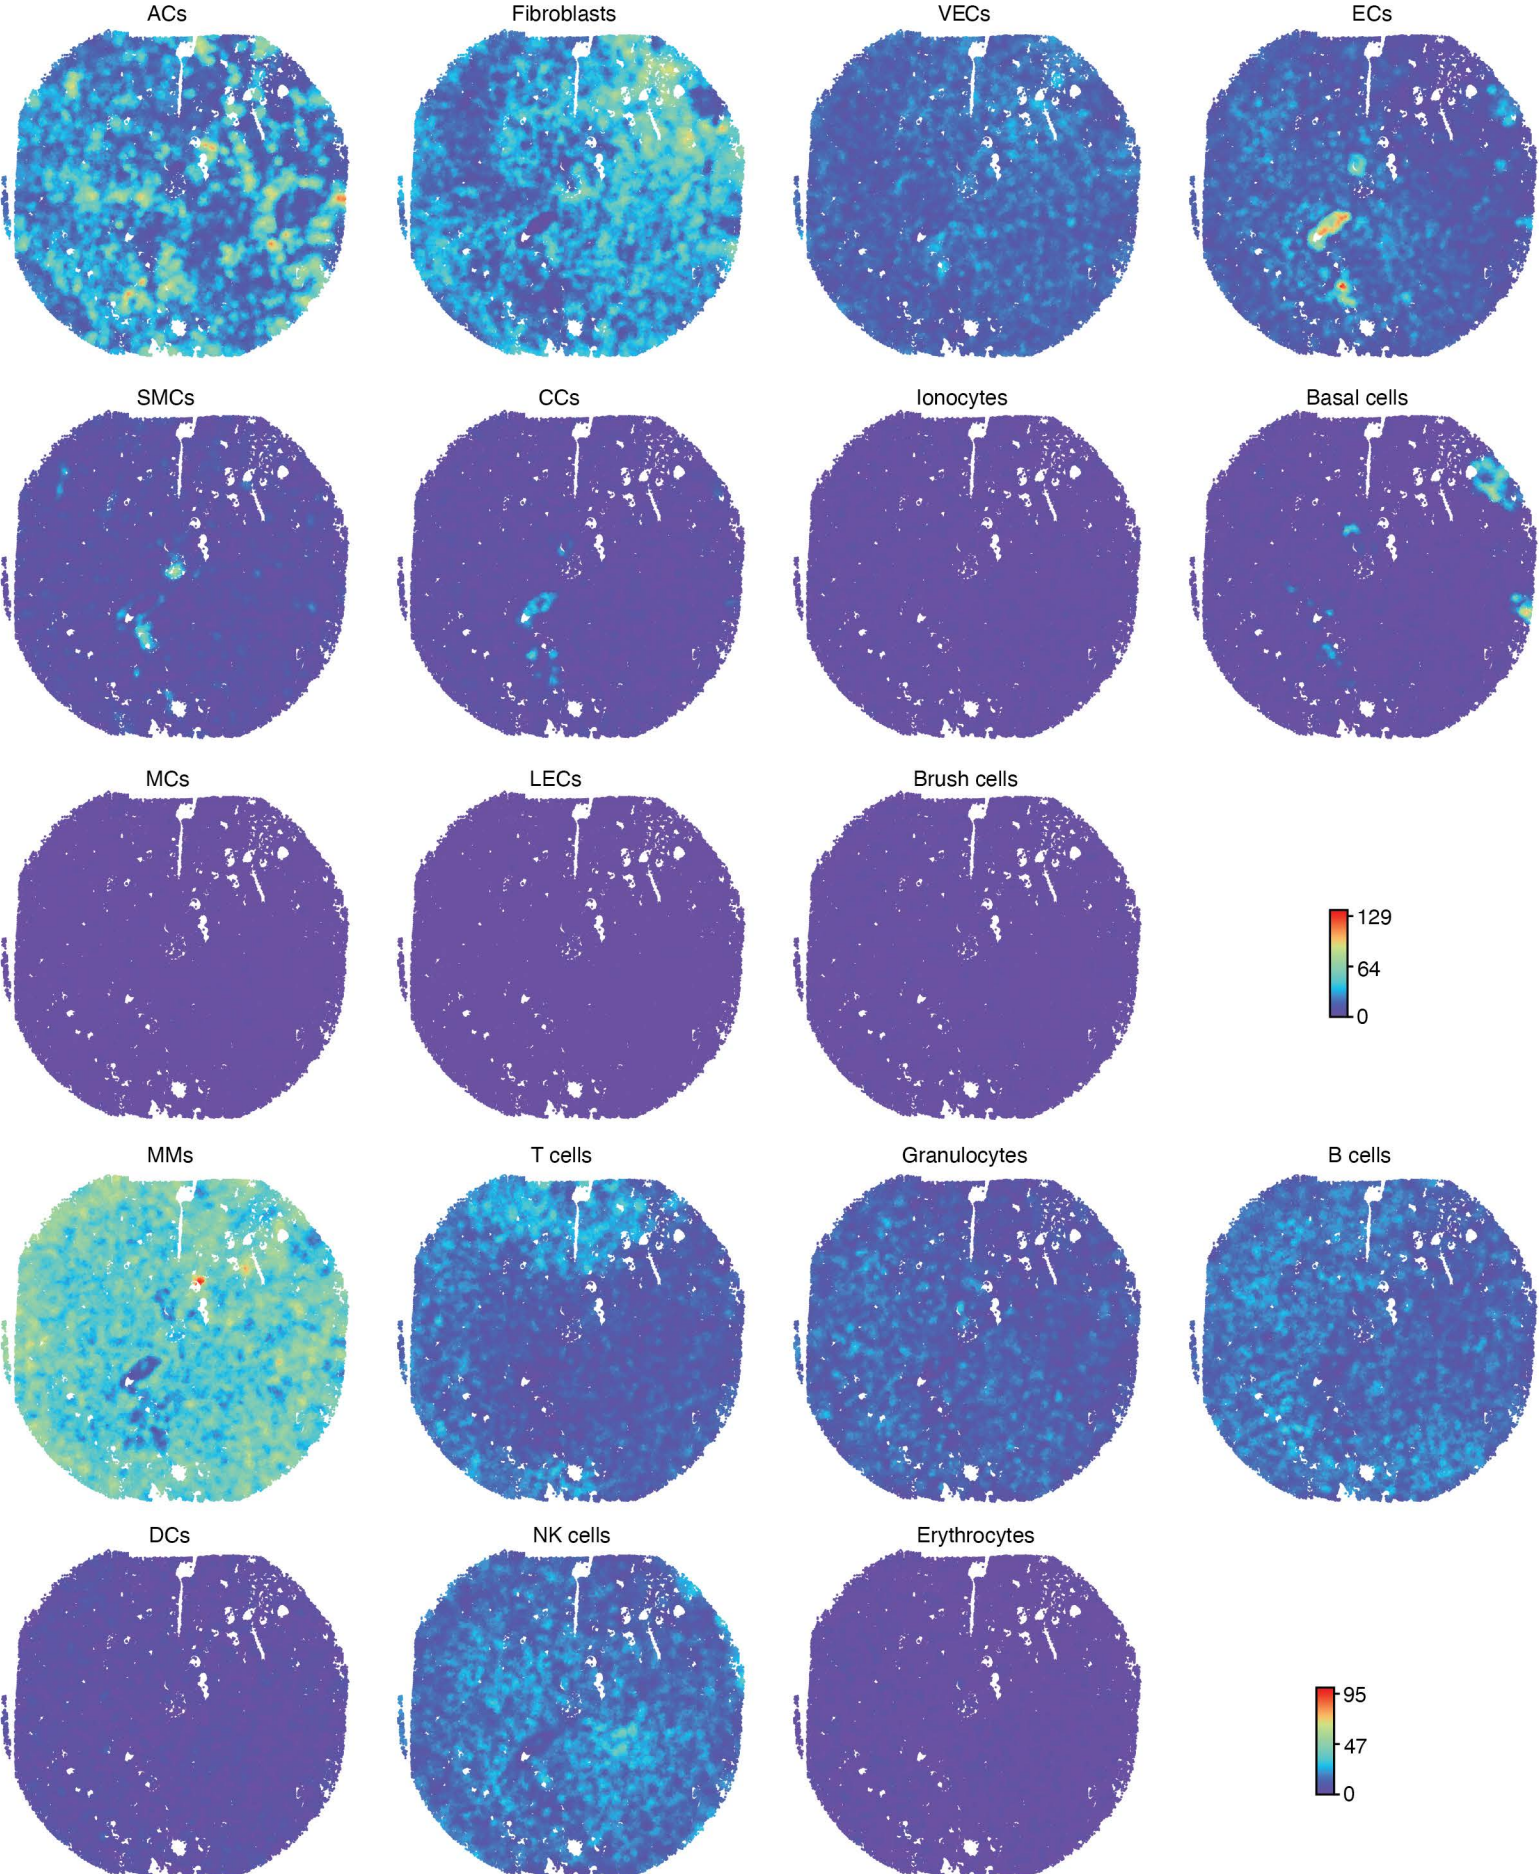



**Figure S15 - Sample PBC-PR Spatial Map of Cell Types**

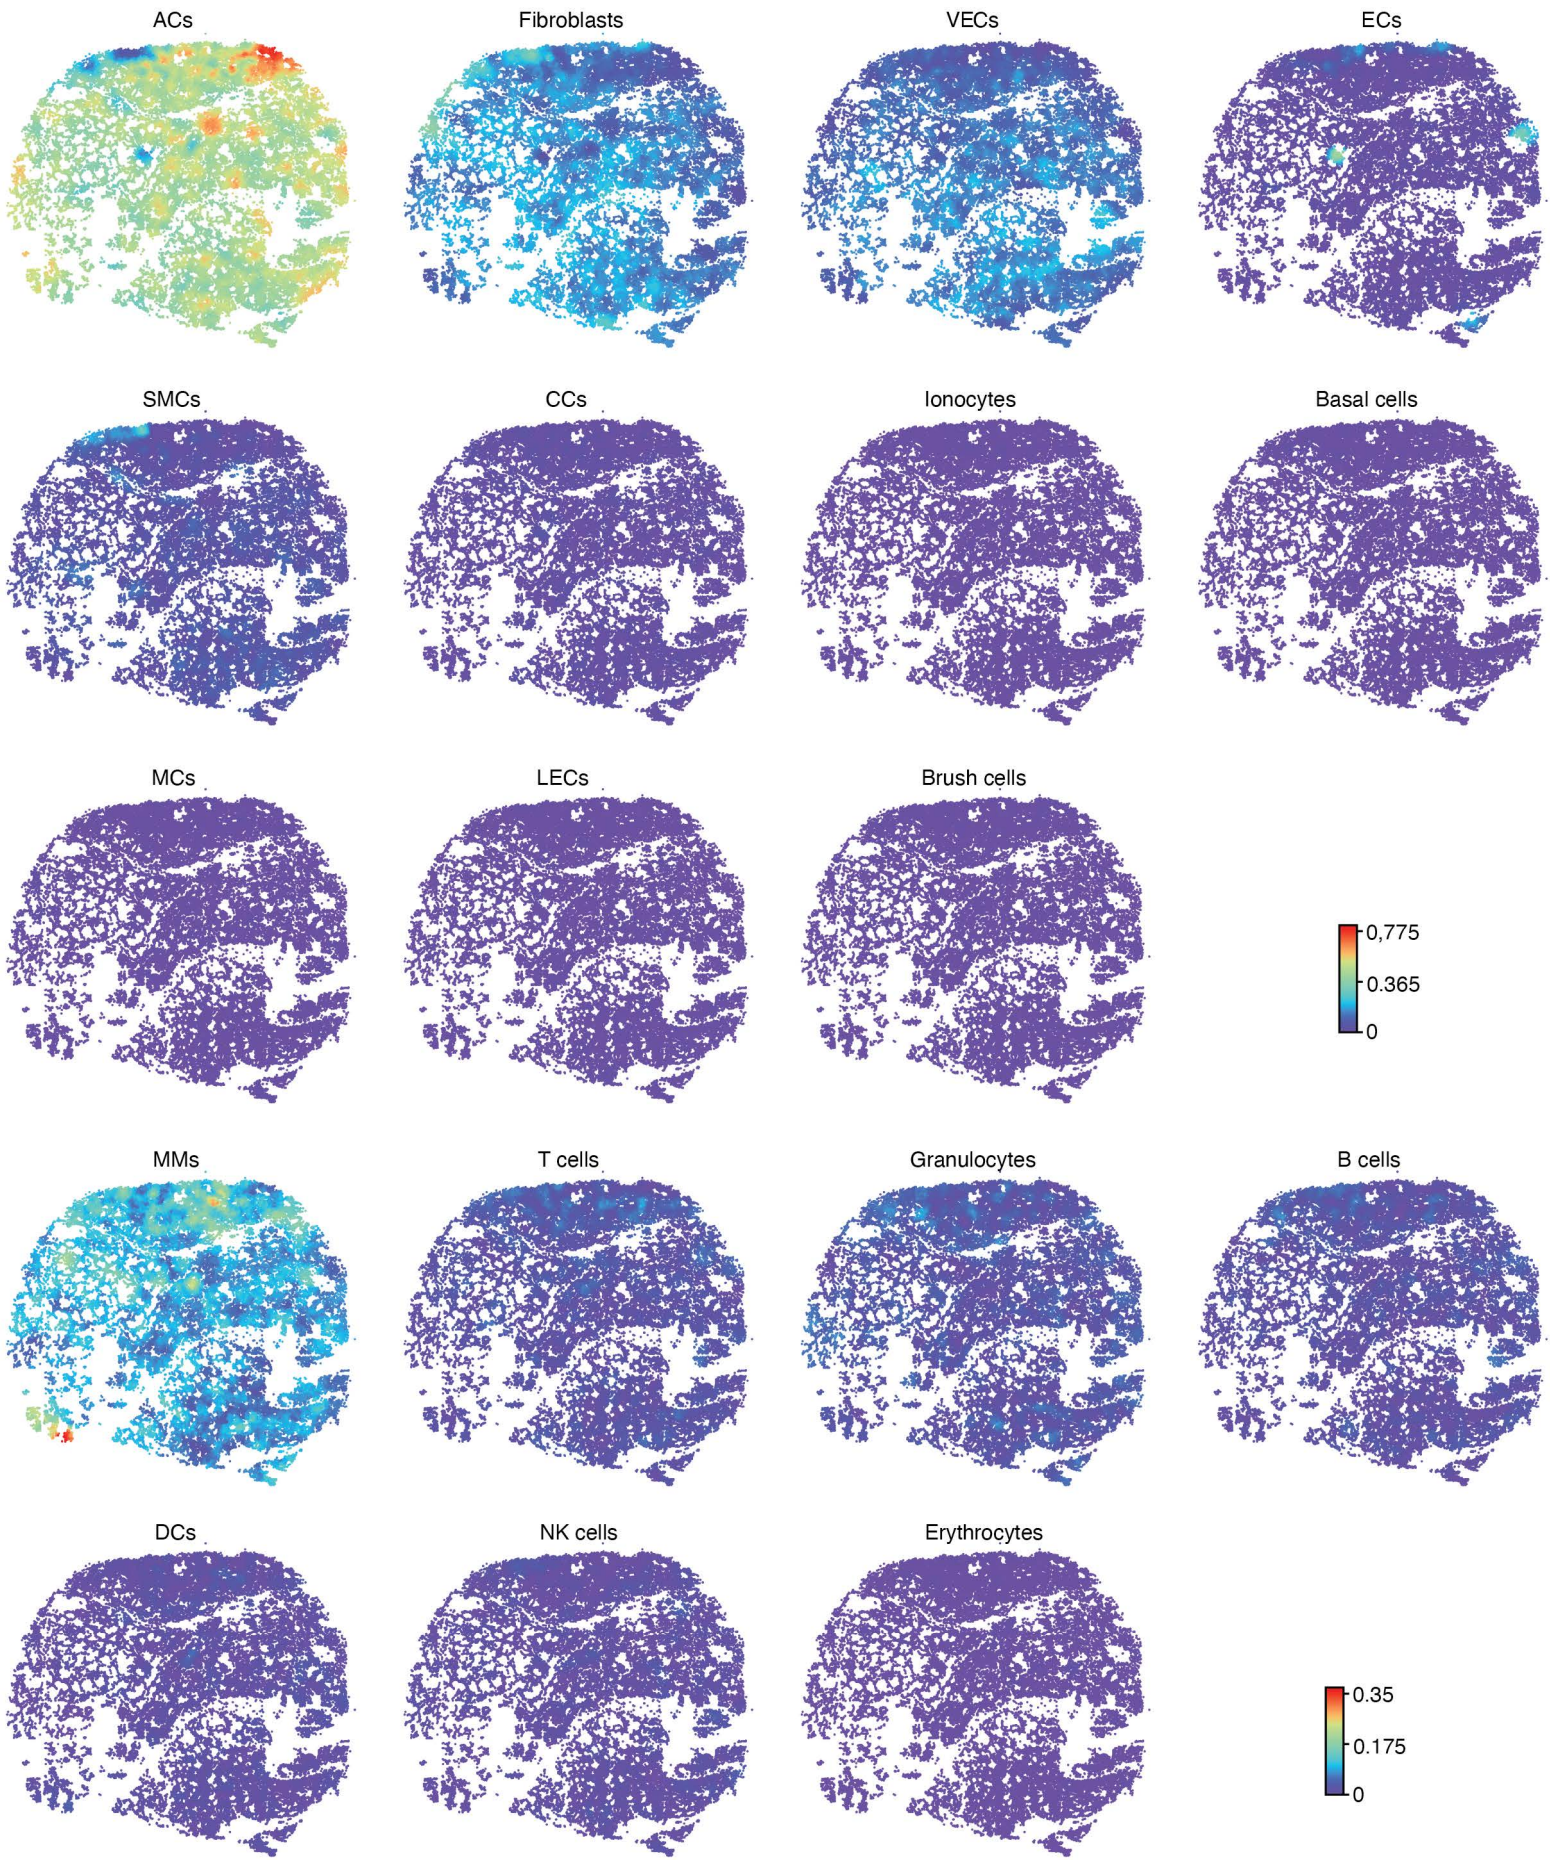



Figure S16

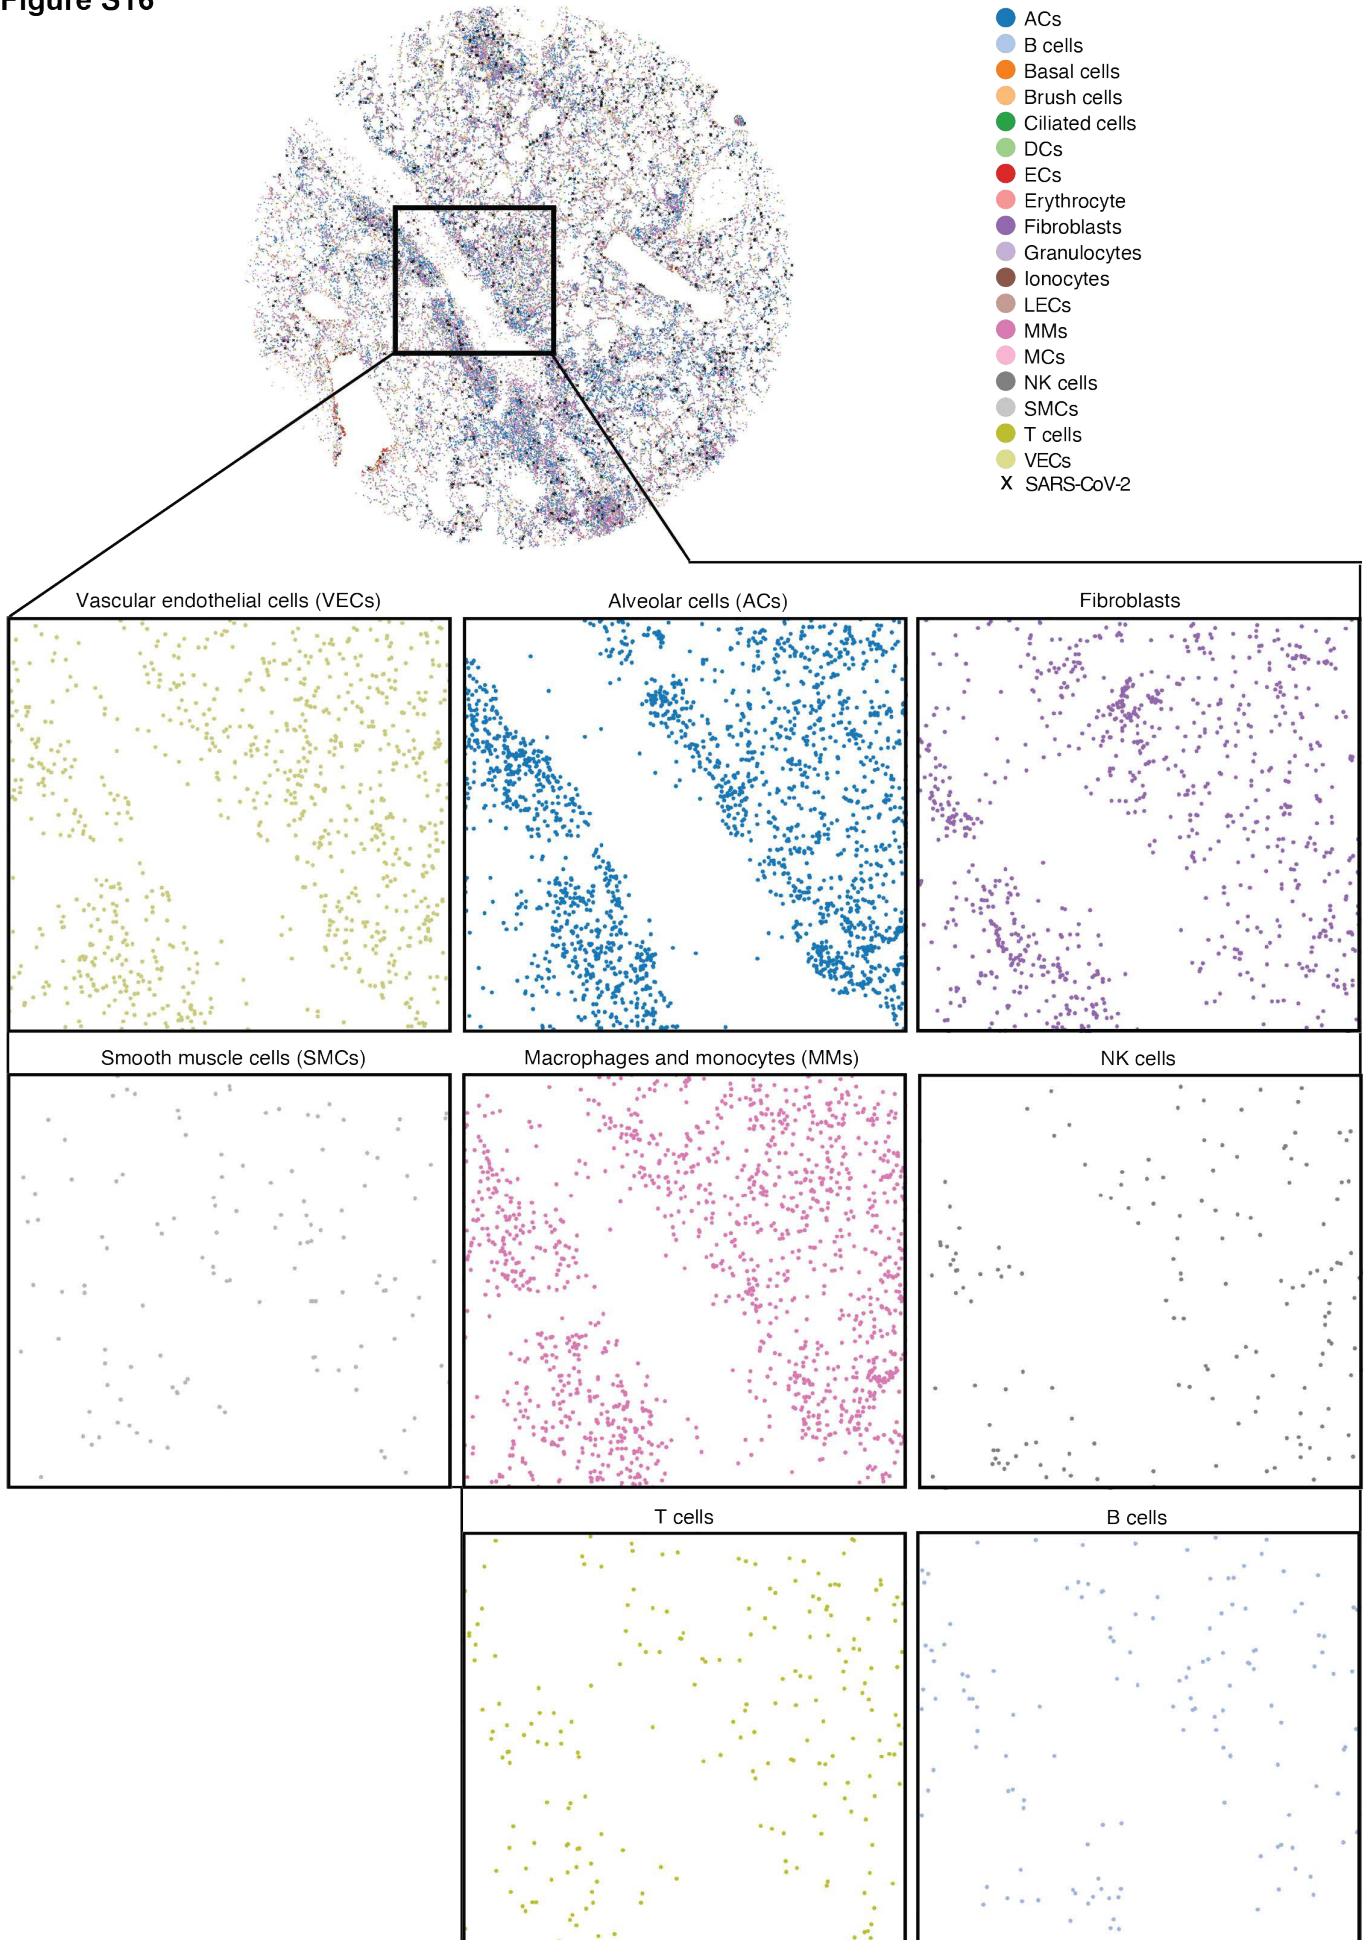

Figure S17

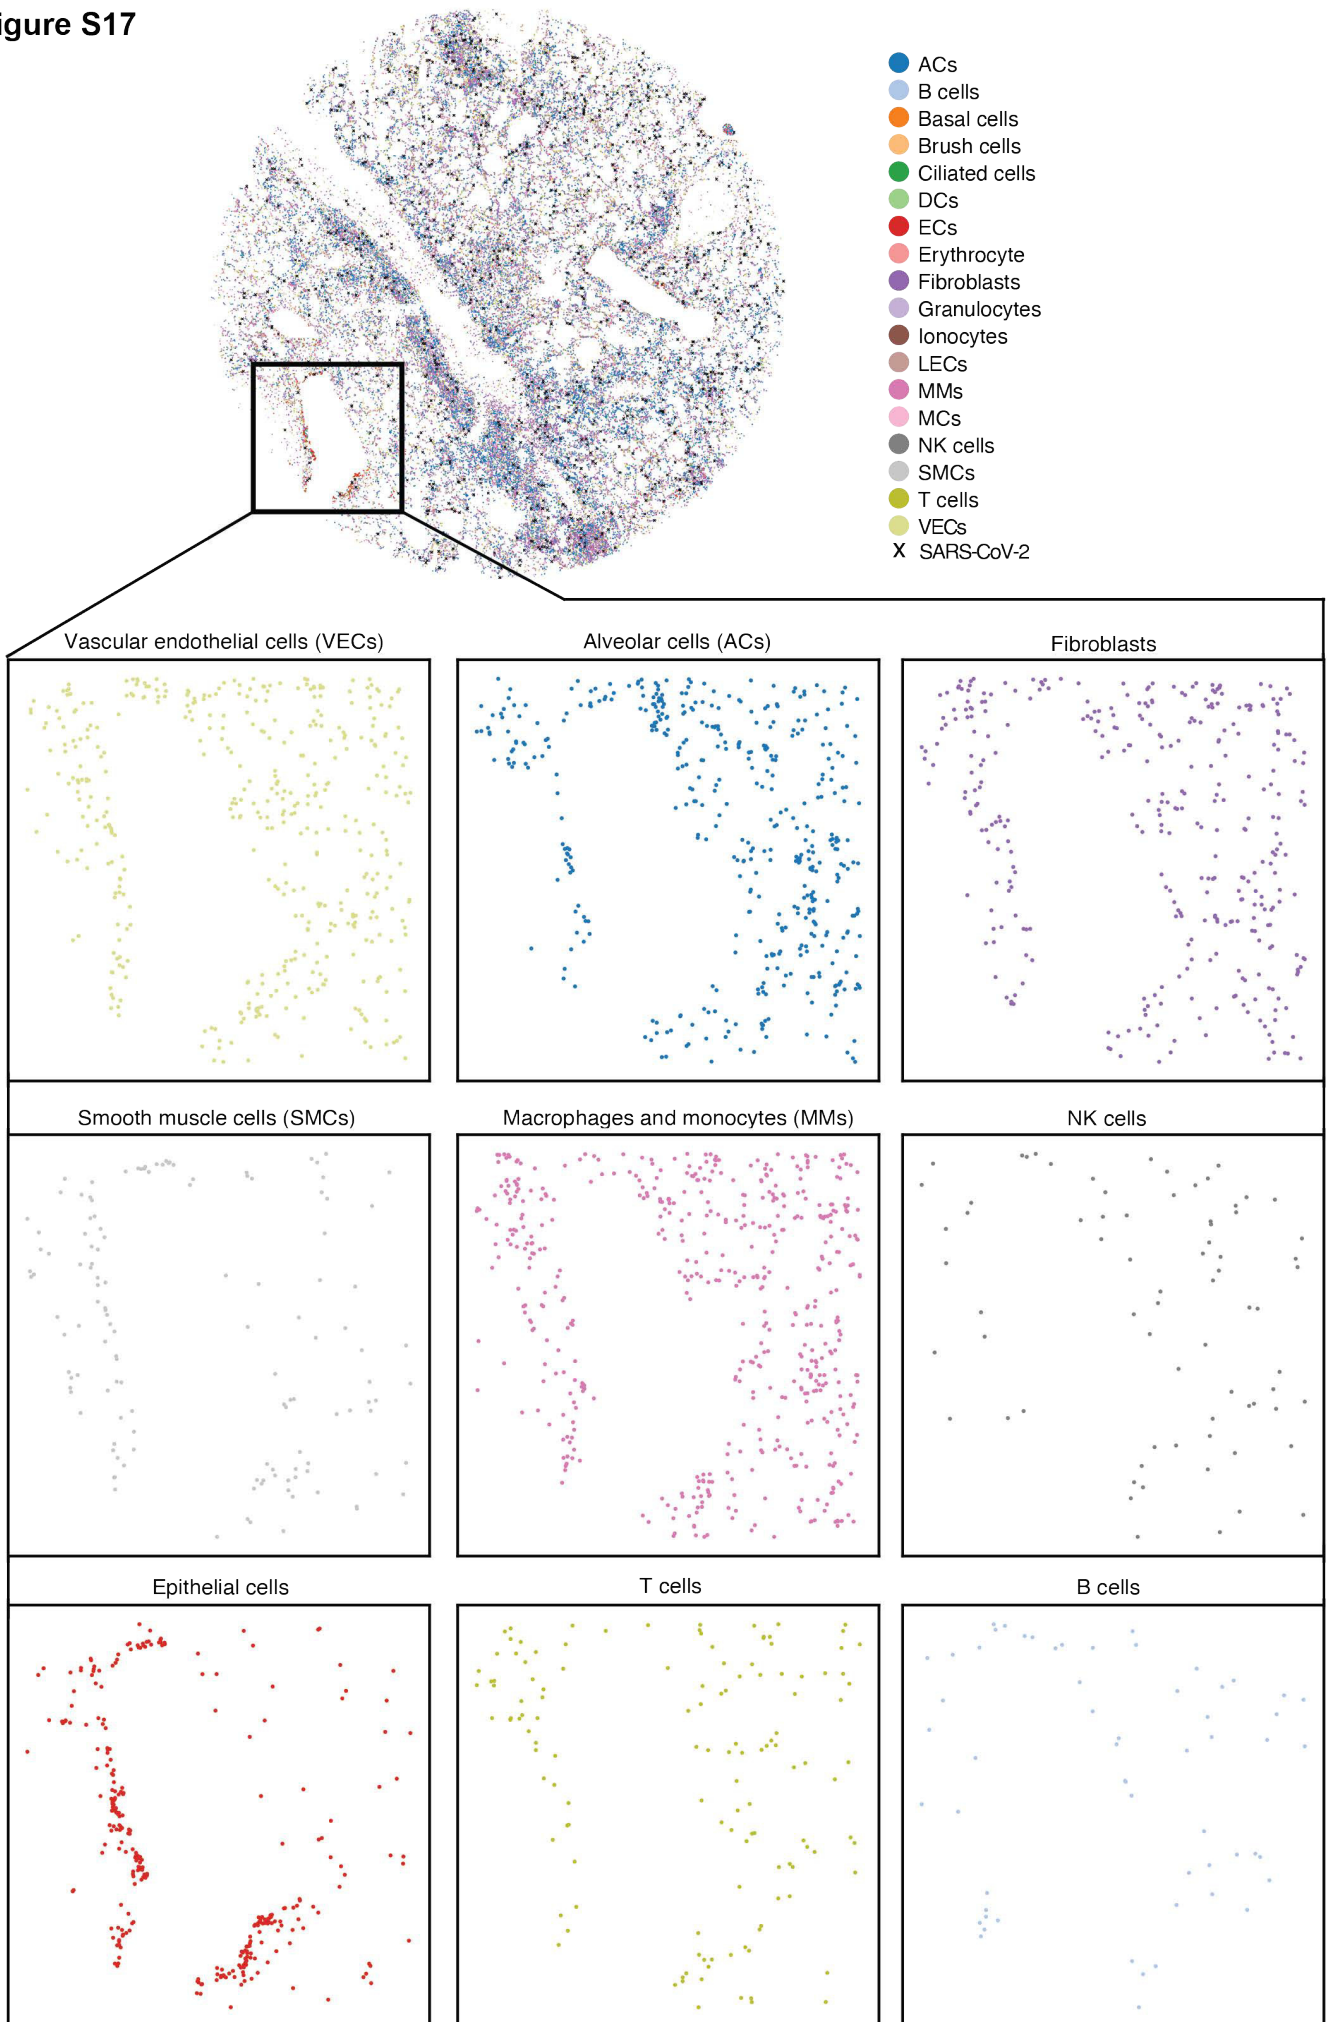



Figure S18: 1-2C

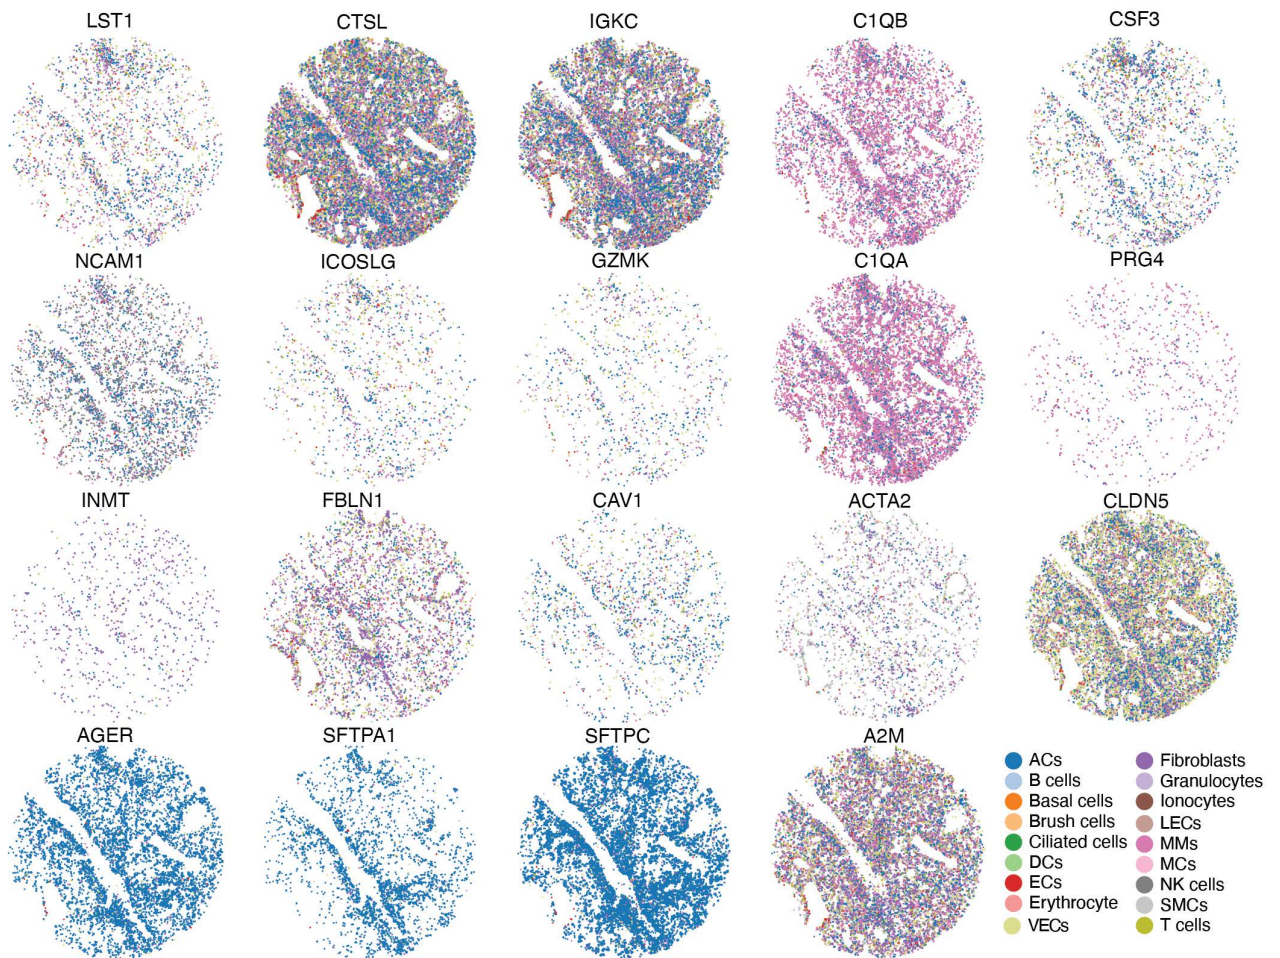

Figure S19: 2-1A

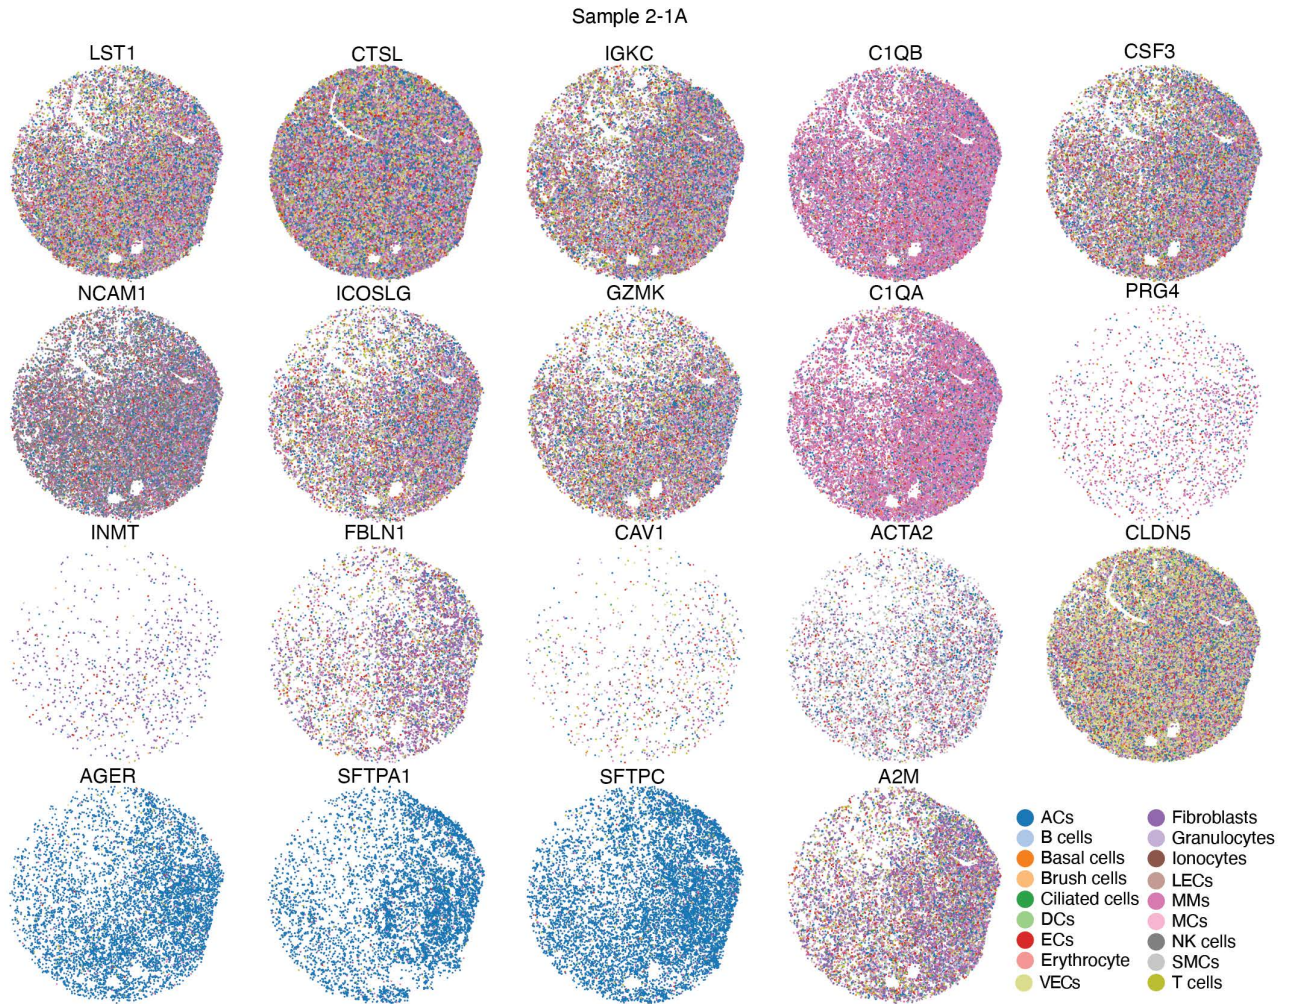



Figure S20: 3-1A

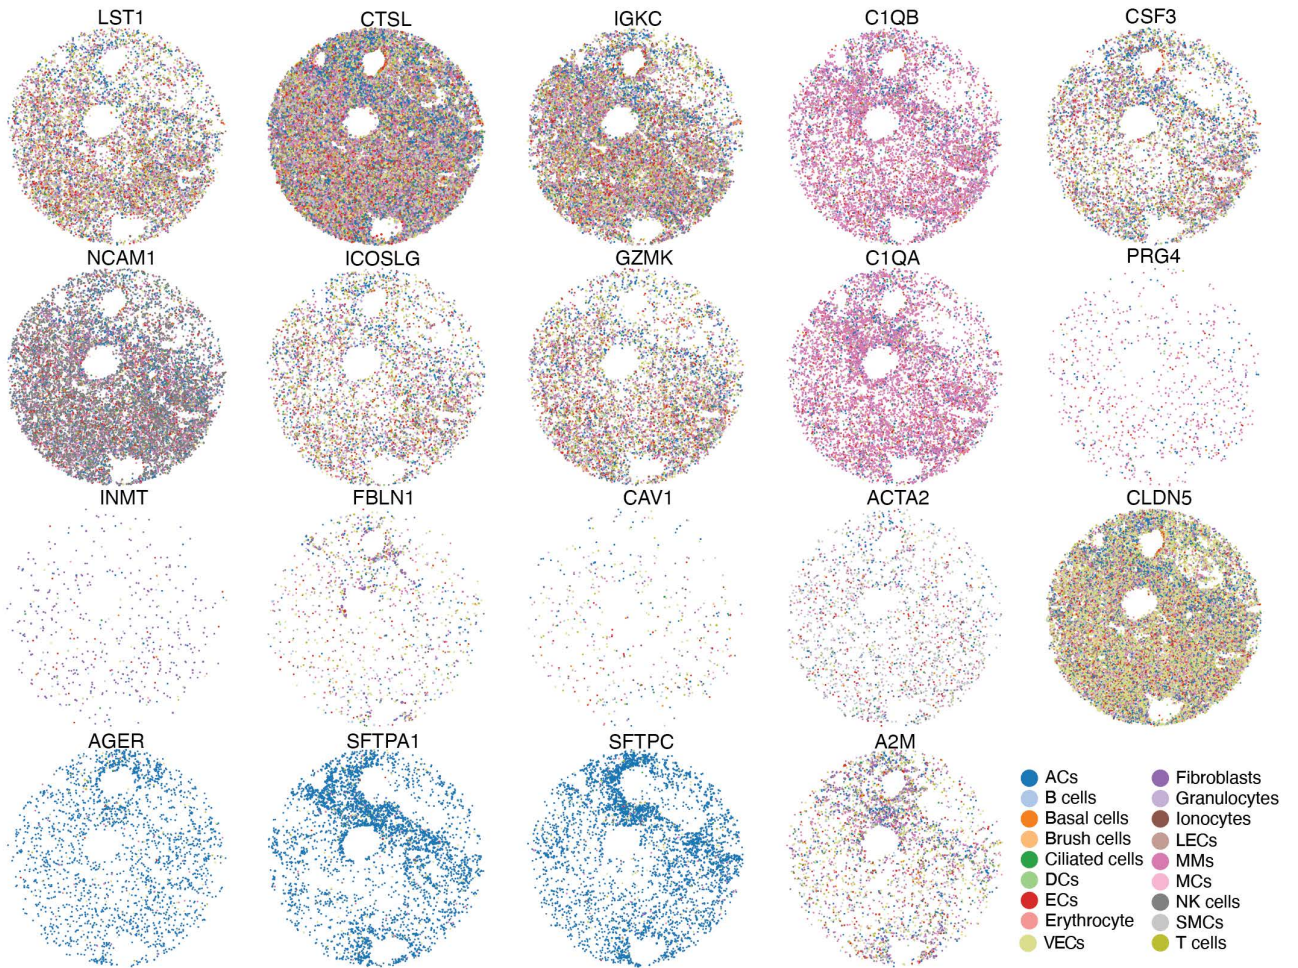

Figure S21: 4-3B

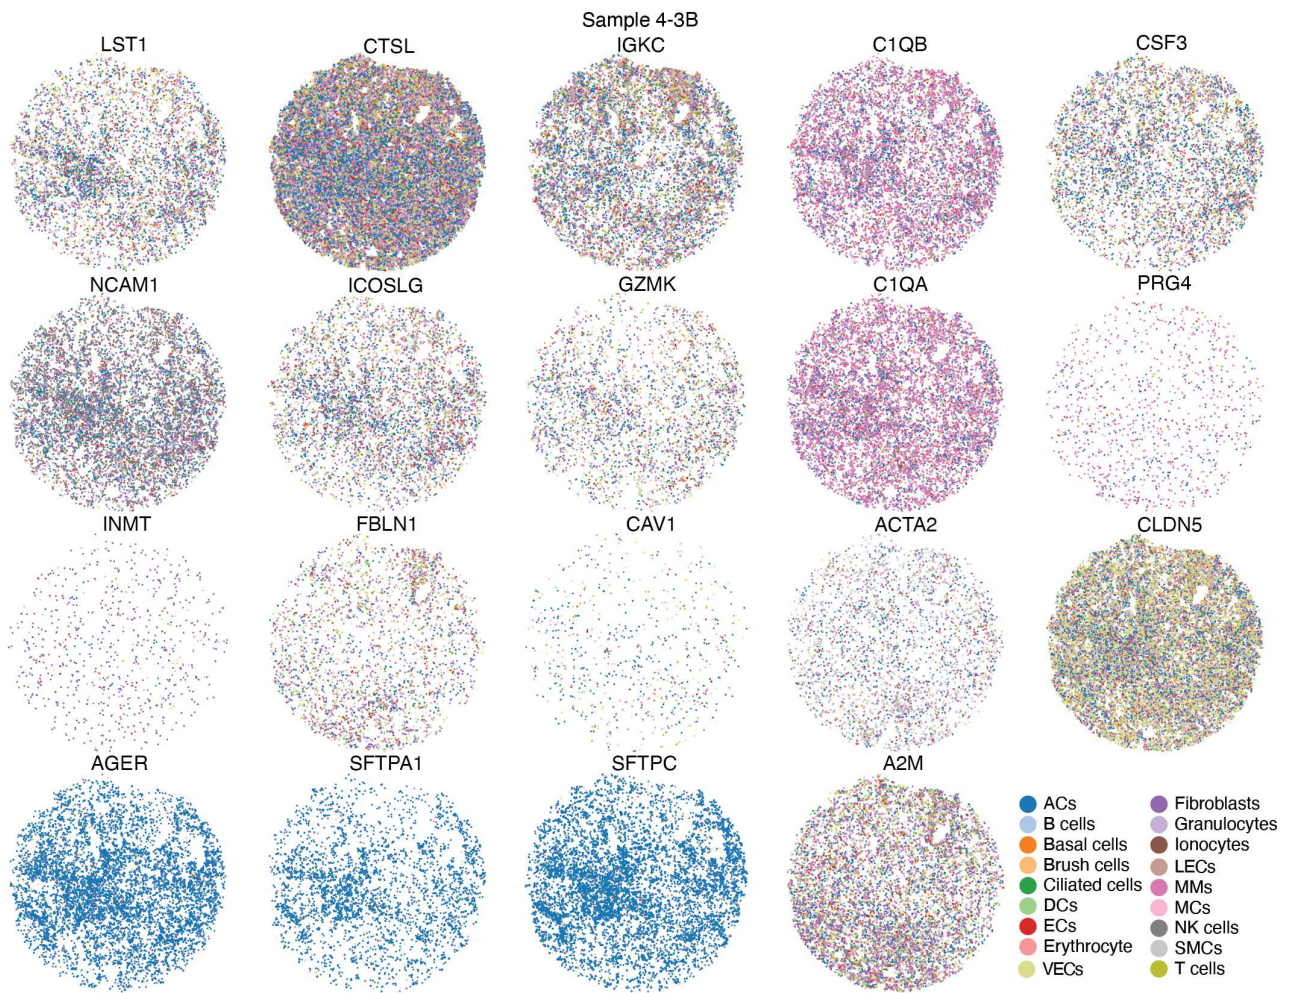



Figure S22: 5-3B

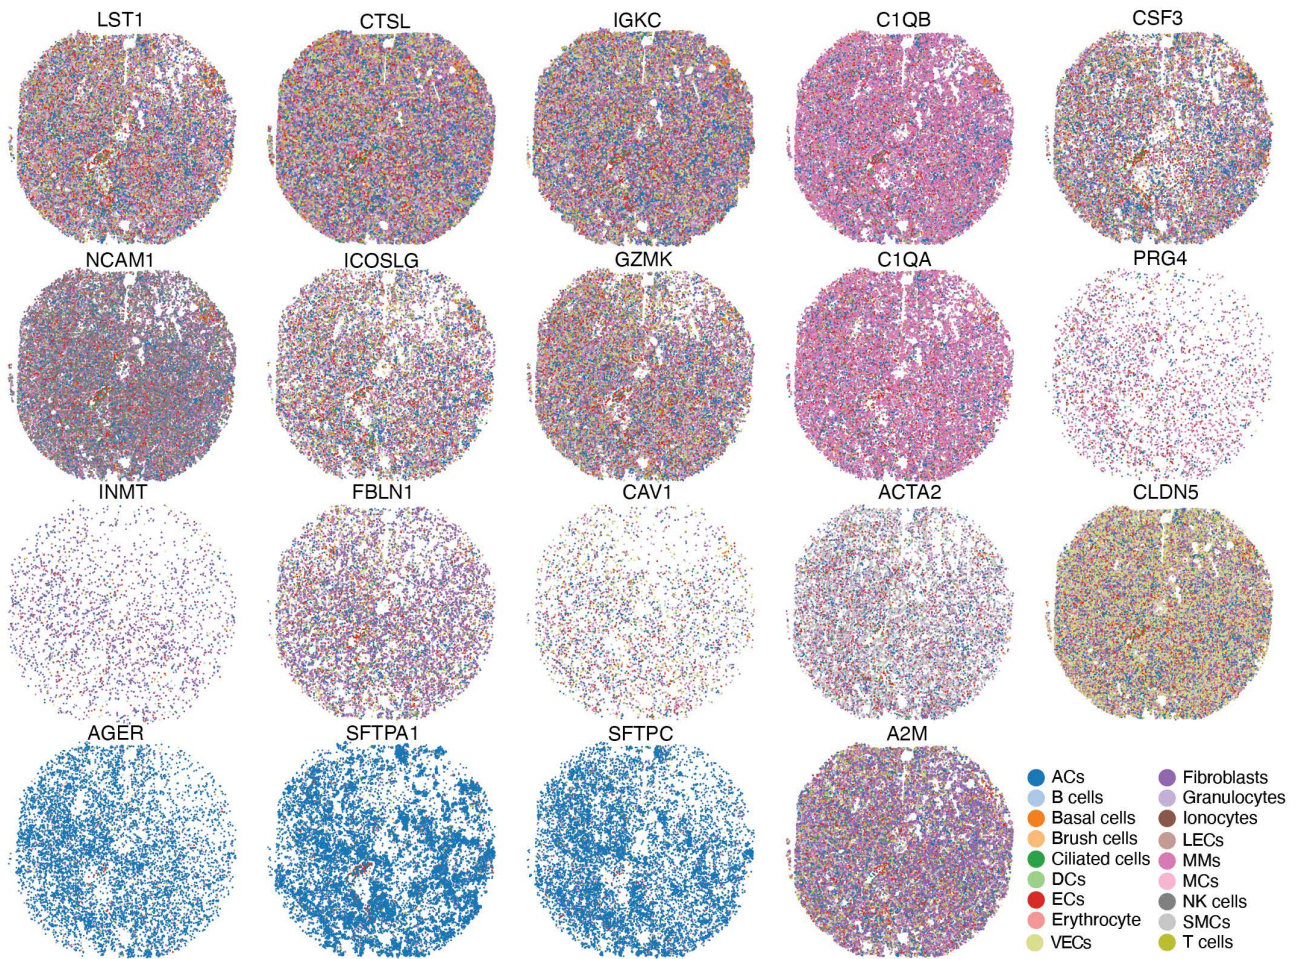

**Figure S23: PBC-PR**

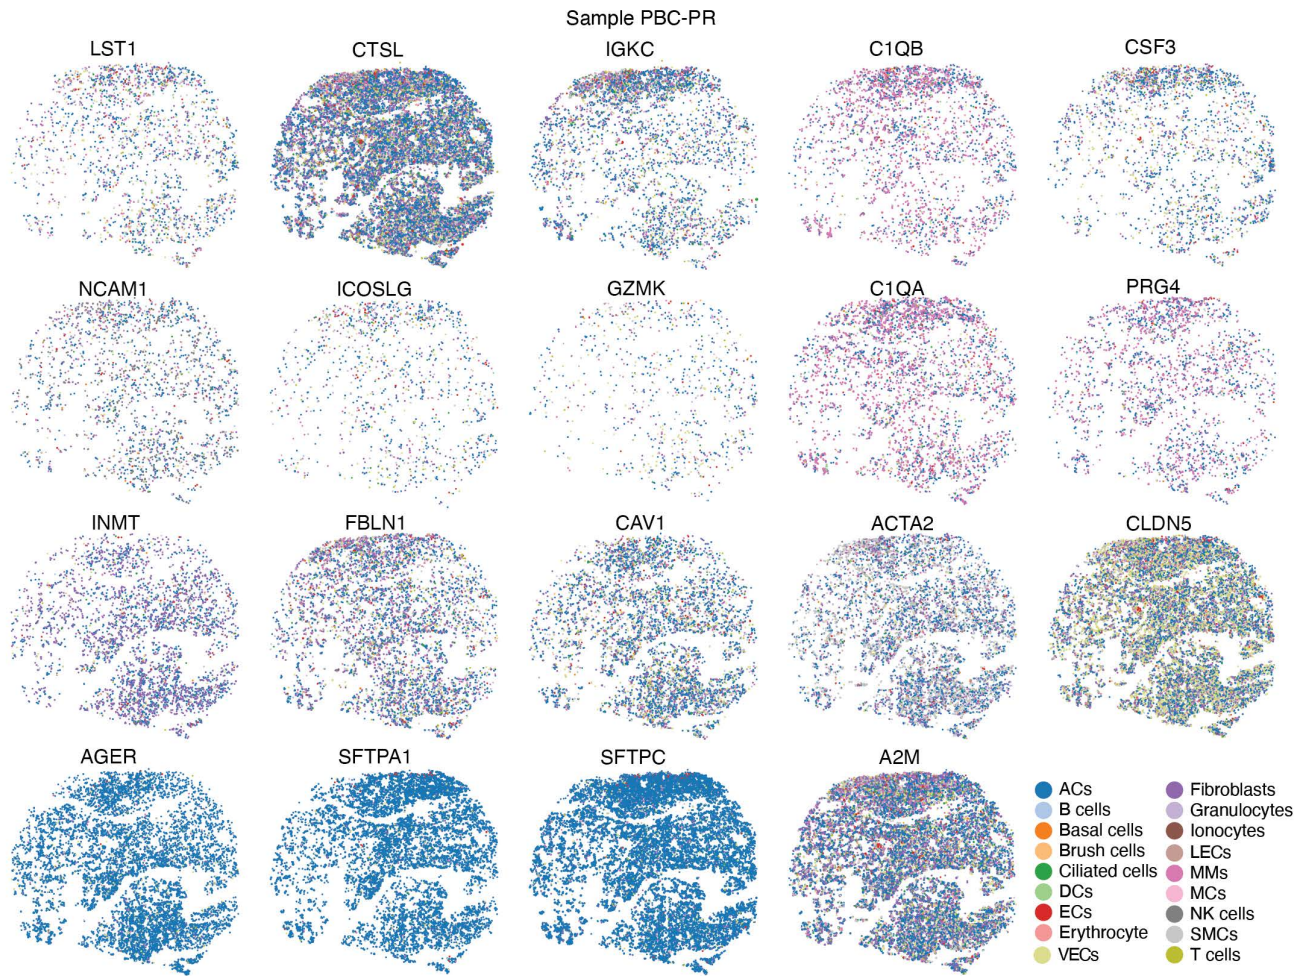



**Figure S24**

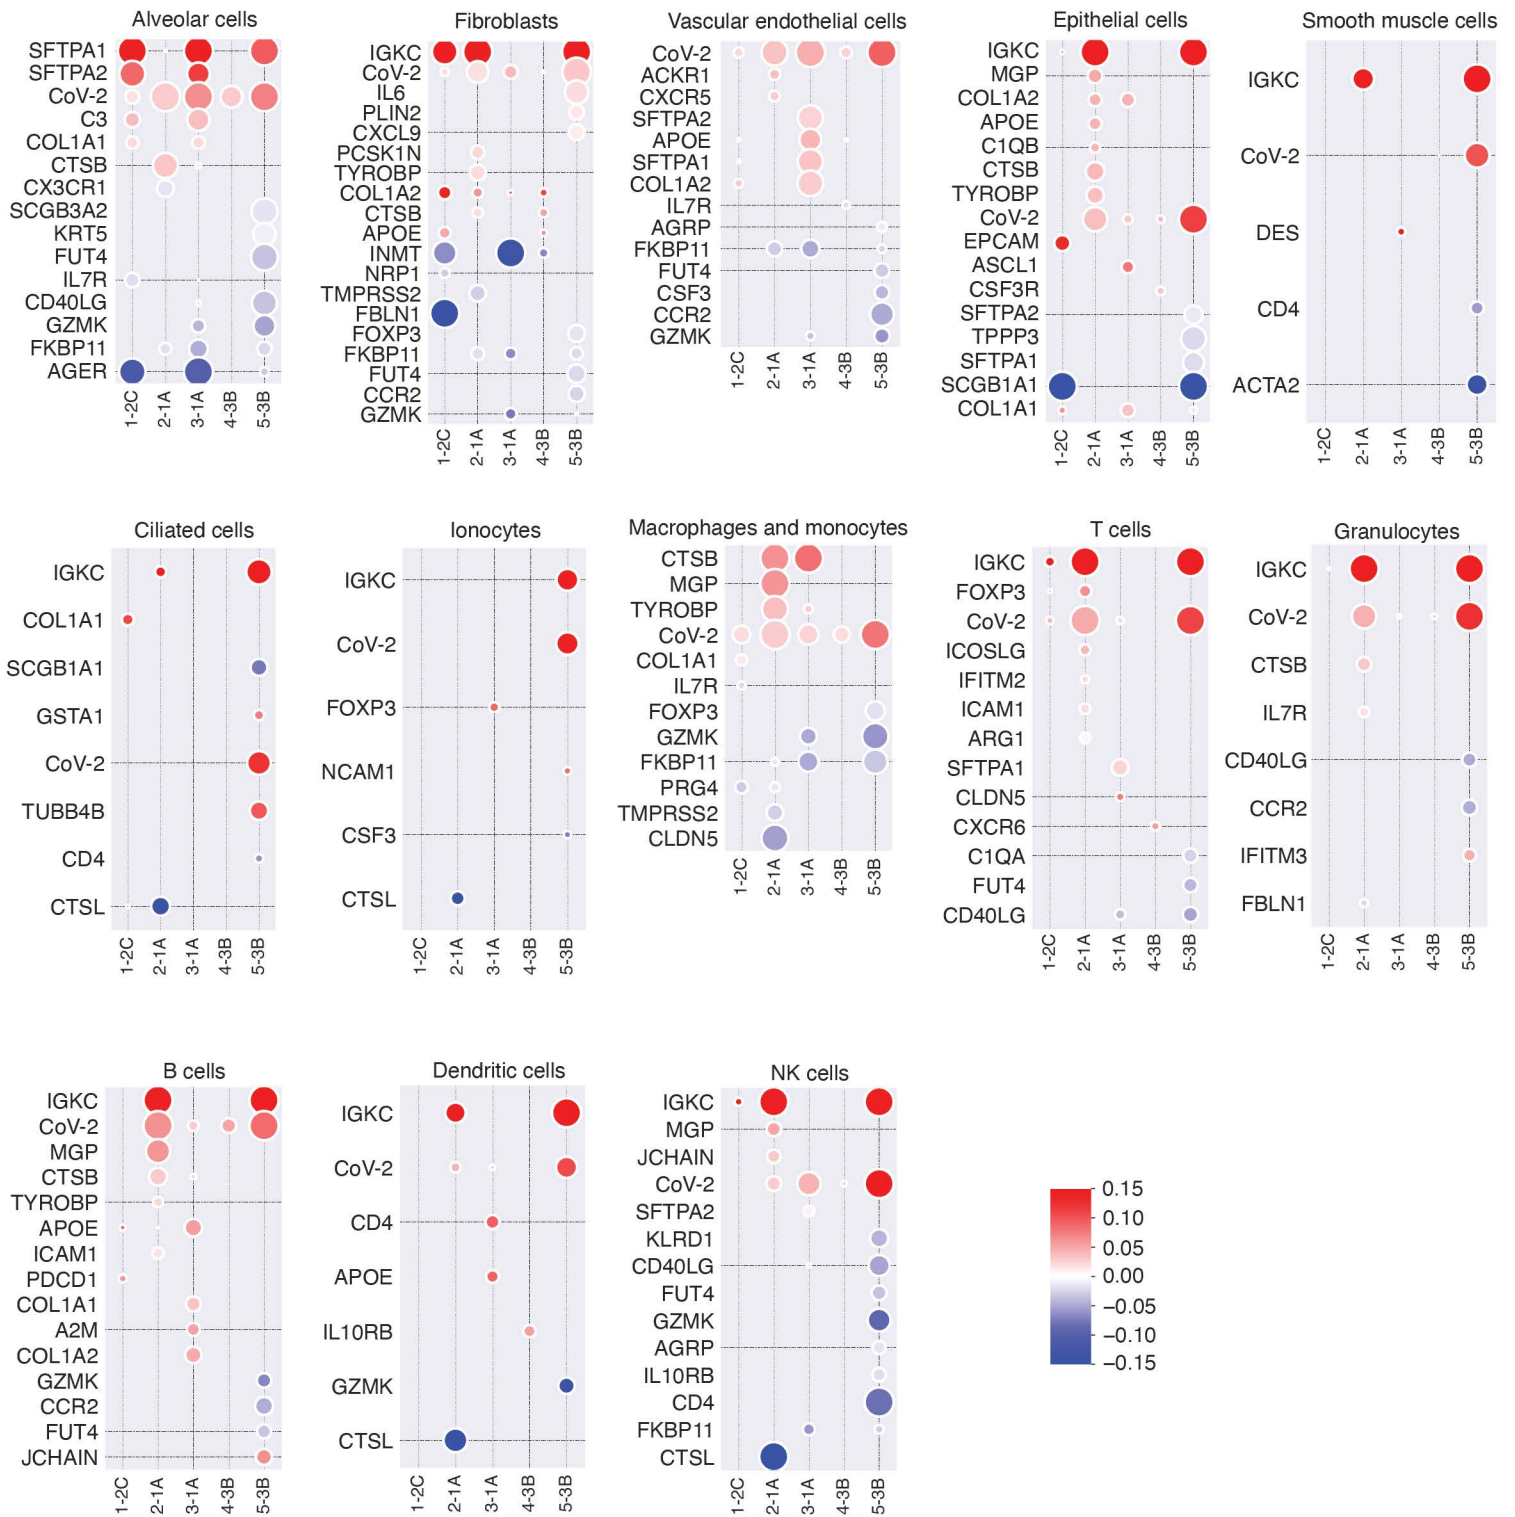

**Figure S25**

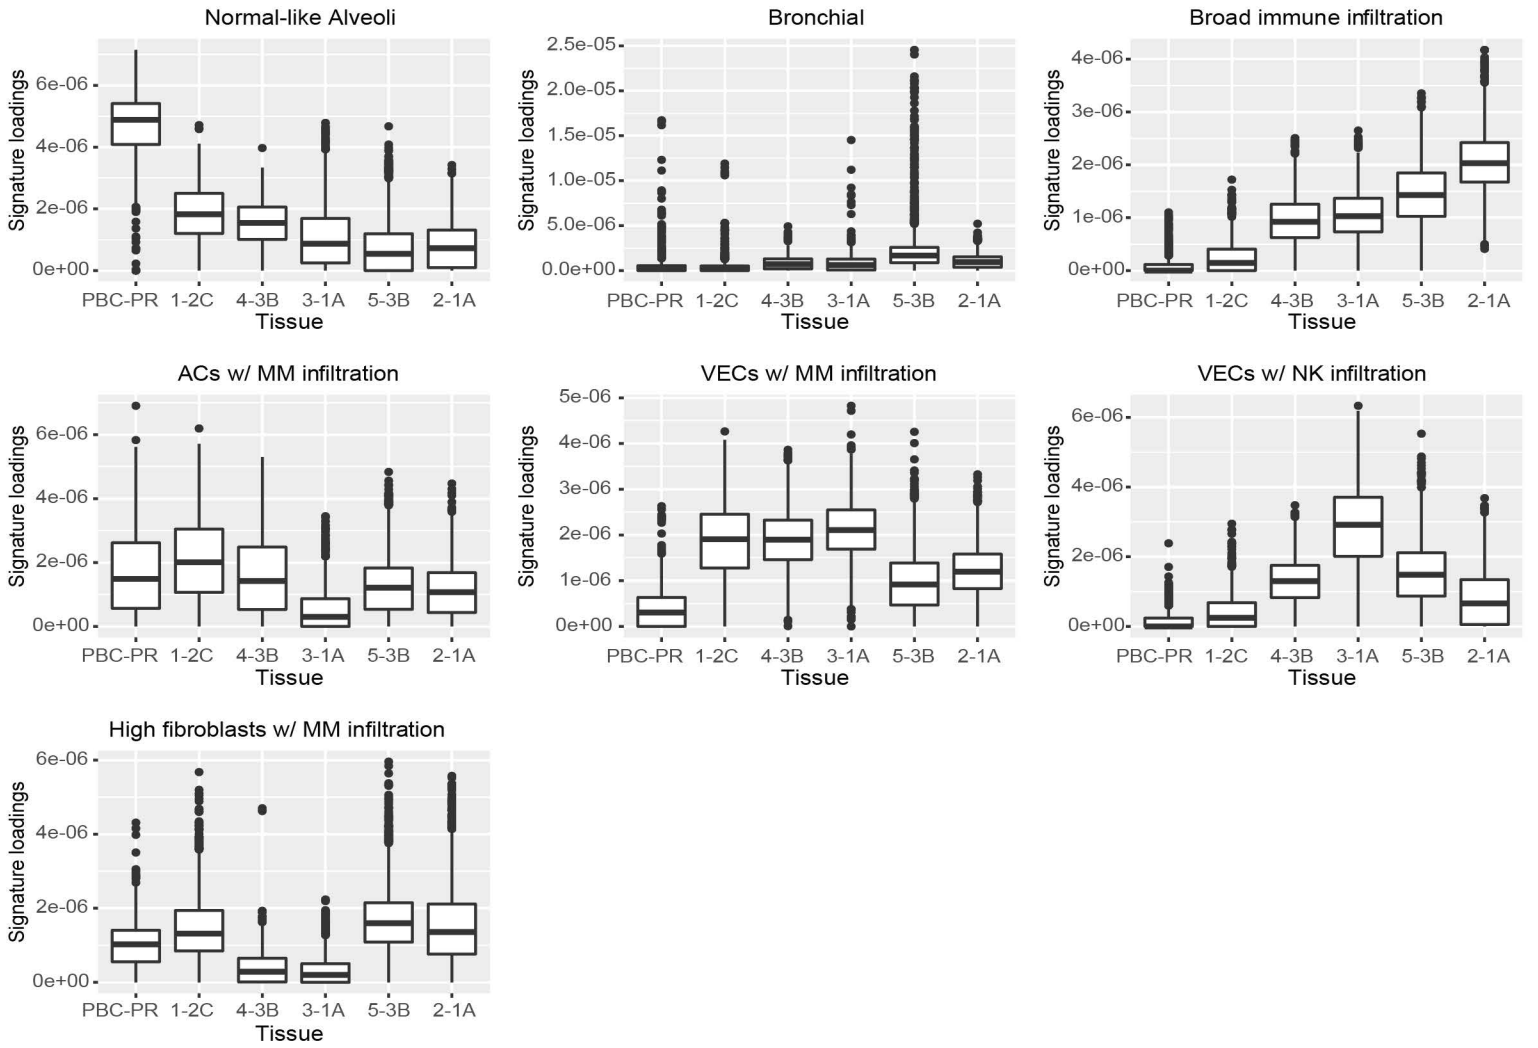



Figure S26

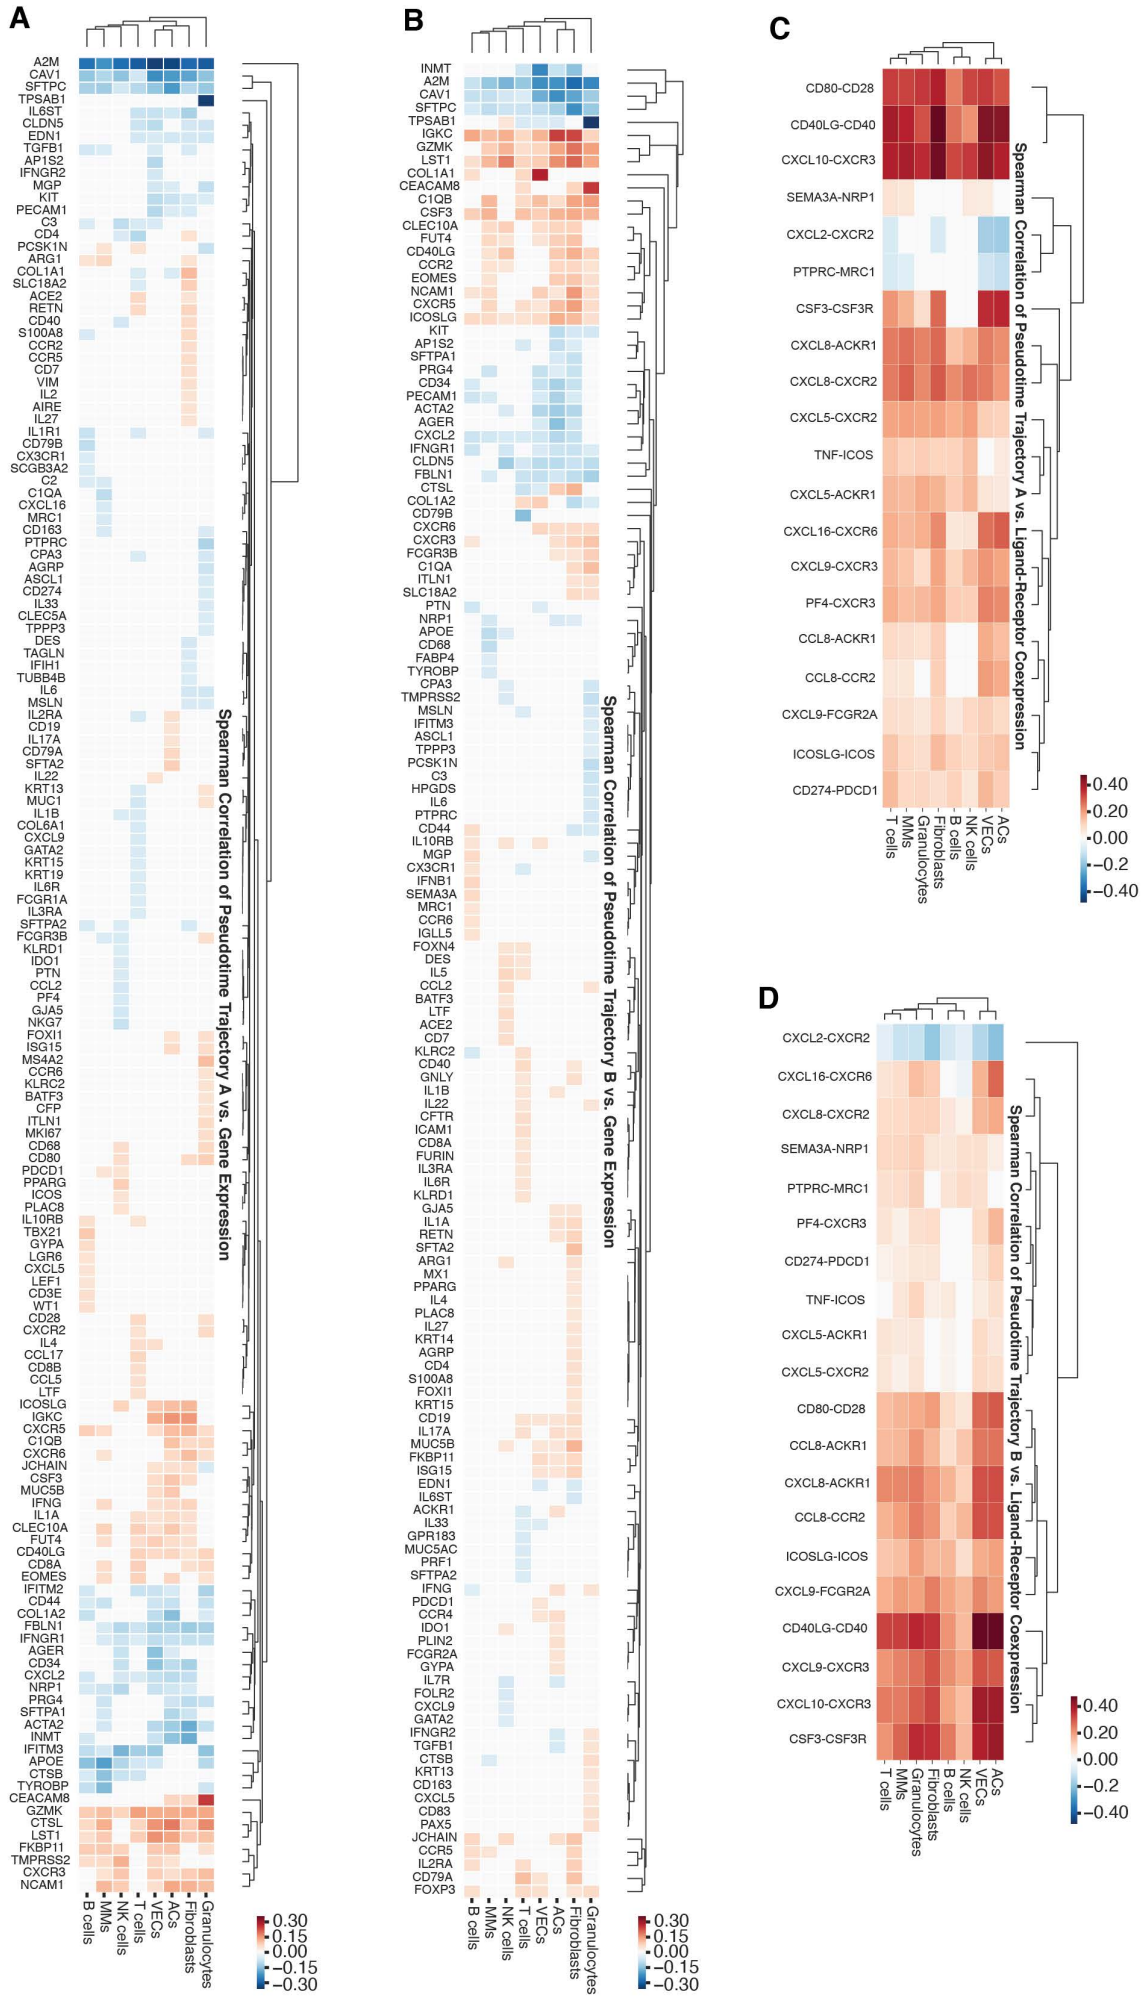

**Figure S27**

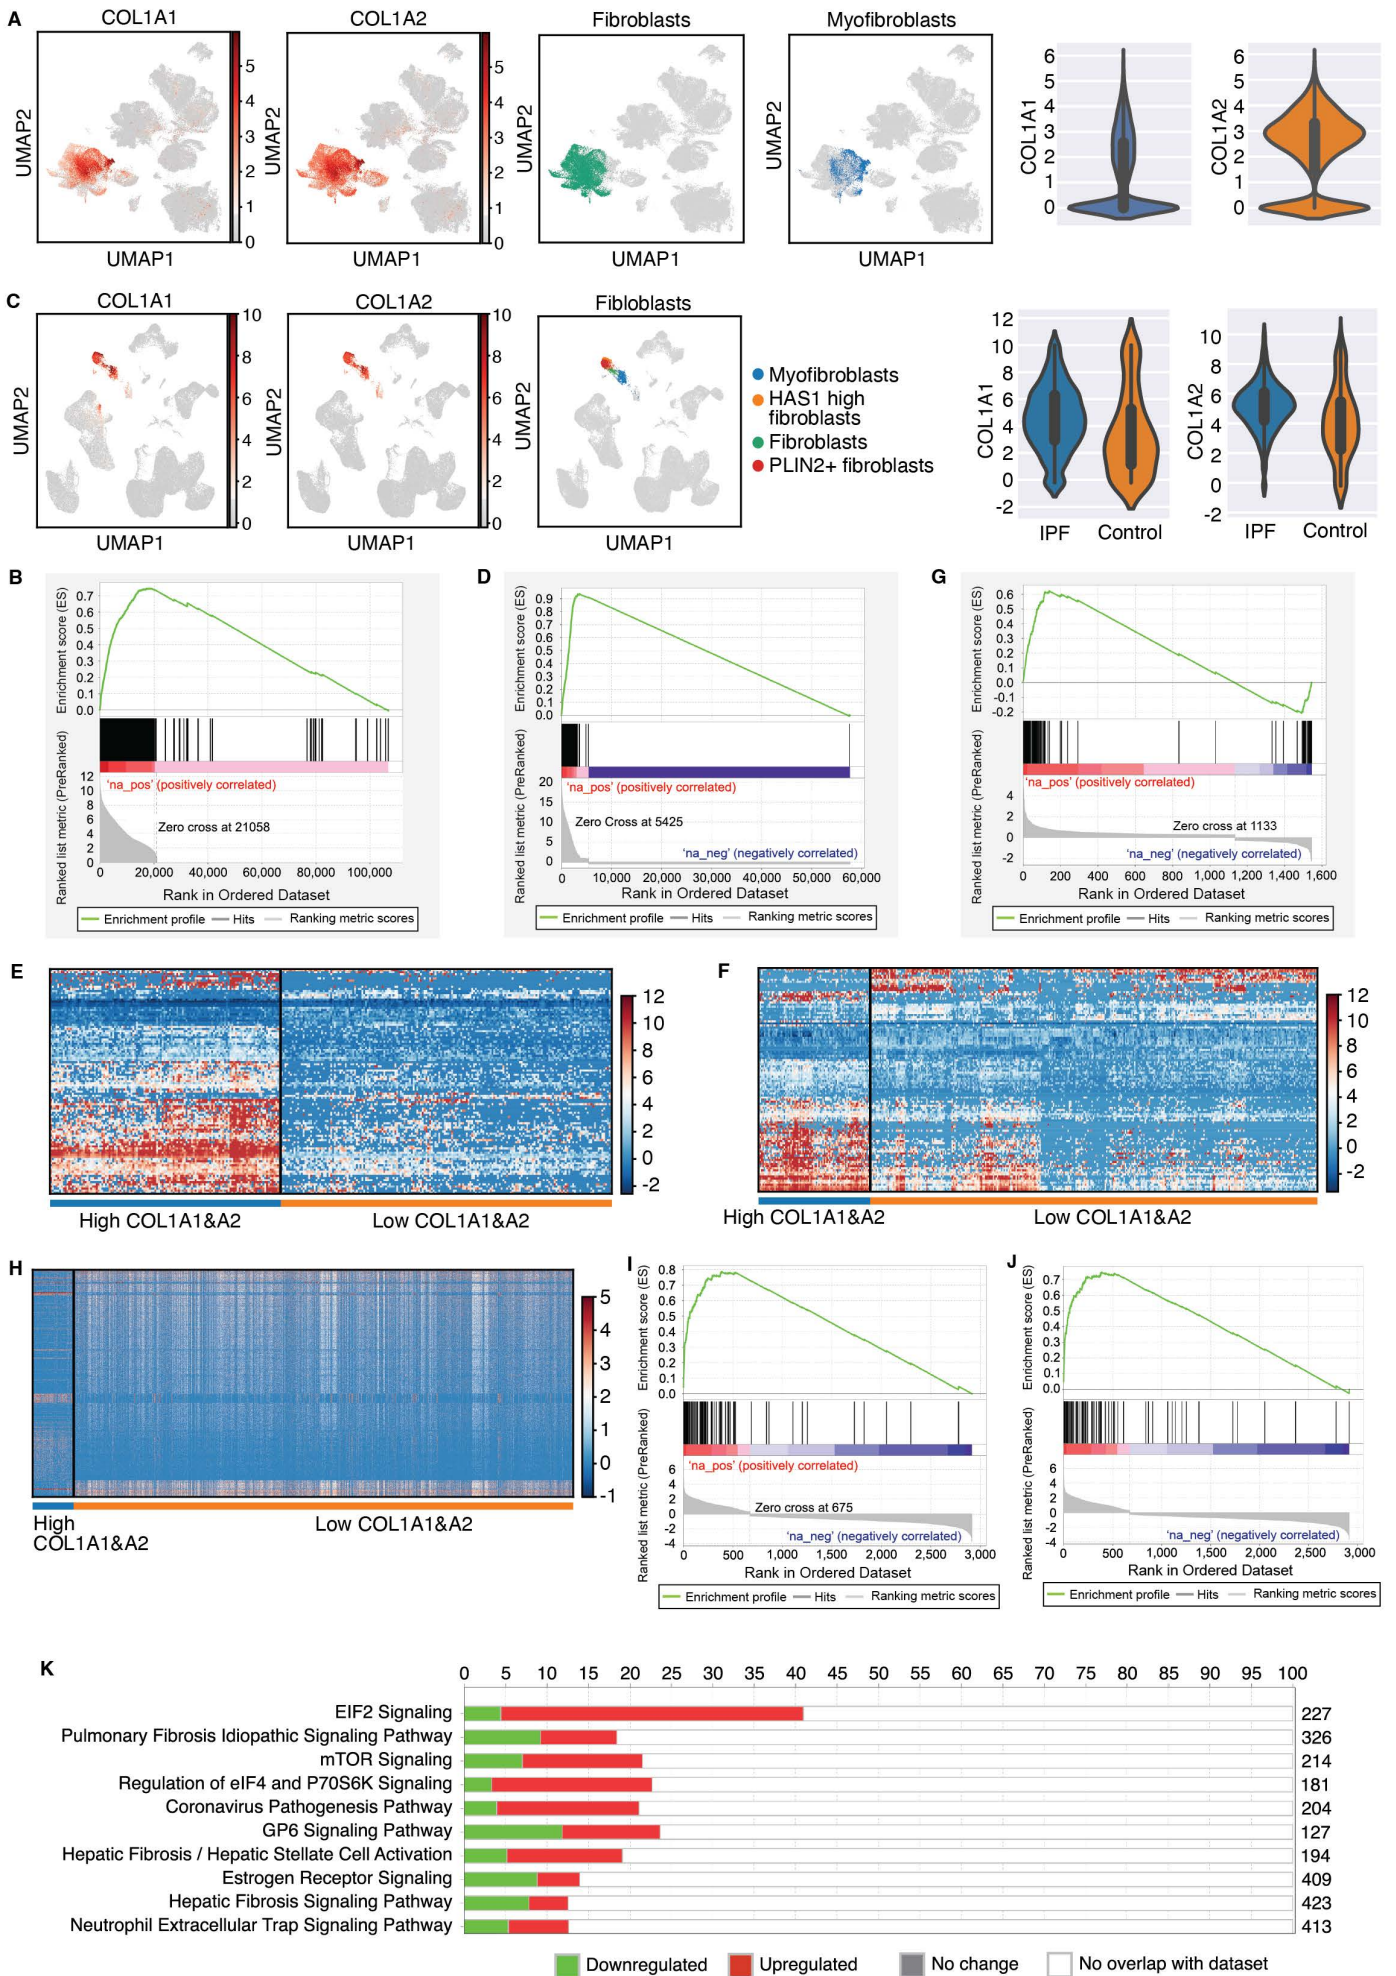

**Table S1. Gene annotation, cell type markers, and total cells expressing individual genes and total reads of the individual genes in each lung tissue after segment**

| Gene  | HGNC ID   | Name                                                 | Annotation of Cell Type    | 1-2C  | 2-1A  | 3-1A  | 4-3B  | 5-3B  | PBC-PR |       |       |       |       |       |       |       |    |
|-------|-----------|------------------------------------------------------|----------------------------|-------|-------|-------|-------|-------|--------|-------|-------|-------|-------|-------|-------|-------|----|
|       |           |                                                      |                            | Total | Ci    | Total | Ci    | Total | Ci     | Total | Ci    | Total | Ci    | Total | Ci    | Total | Ci |
| A2M   | HGNC:7    | alpha-2-macroglobulin                                |                            | 42643 | 80341 | 28959 | 37365 | 9830  | 11626  | 24699 | 33682 | 74687 | 1E+05 | 50795 | 83748 |       |    |
| ACE2  | HGNC:1355 | angiotensin I converting enzyme 2                    |                            | 213   | 221   | 2281  | 2344  | 1274  | 1310   | 667   | 694   | 3353  | 3471  | 176   | 178   |       |    |
| ACKR  | HGNC:4035 | atypical chemokine receptor 1 (Duffy blood group)    | Vascular endothelial cells | 1283  | 1366  | 5750  | 5926  | 3307  | 3428   | 2622  | 2729  | 9958  | 10555 | 2301  | 2614  |       |    |
| ACTA  | HGNC:130  | actin alpha 2, smooth muscle                         | Smooth muscle cells        | 5164  | 6156  | 9006  | 9442  | 4110  | 4296   | 6756  | 7571  | 20041 | 23428 | 14003 | 16904 |       |    |
| AGER  | HGNC:320  | advanced glycosylation end-product specific I        | Alveolar cells             | 16263 | 27549 | 10958 | 11939 | 4034  | 4371   | 16636 | 25020 | 10146 | 11282 | 17701 | 22204 |       |    |
| AGRP  | HGNC:330  | agouti related neuropeptide                          |                            | 406   | 427   | 2963  | 3067  | 1601  | 1655   | 1154  | 1208  | 5717  | 5966  | 499   | 523   |       |    |
| AIRE  | HGNC:360  | autoimmune regulator                                 |                            | 196   | 200   | 1116  | 1130  | 660   | 671    | 549   | 566   | 1506  | 1539  | 321   | 333   |       |    |
| AP1S  | HGNC:560  | adaptor related protein complex 1 subunit sigma 2    |                            | 926   | 962   | 1135  | 1166  | 806   | 832    | 591   | 609   | 2509  | 2570  | 1954  | 2042  |       |    |
| APOE  | HGNC:613  | apolipoprotein E                                     |                            | 12592 | 17576 | 21172 | 27036 | 6671  | 7410   | 22642 | 32501 | 7374  | 7863  | 5771  | 6545  |       |    |
| ARG1  | HGNC:663  | arginase 1                                           | Macrophages and monocytes  | 385   | 399   | 5884  | 6076  | 1952  | 2018   | 1534  | 1594  | 5139  | 5357  | 322   | 332   |       |    |
| ASCL1 | HGNC:738  | achaete-scute family bHLH transcription factor       | Epithelial cells           | 404   | 418   | 3640  | 3738  | 1531  | 1583   | 1713  | 1793  | 3938  | 4080  | 301   | 308   |       |    |
| ASCL3 | HGNC:740  | achaete-scute family bHLH transcription factor       | Ionocytes                  | 320   | 333   | 1475  | 1544  | 1194  | 1254   | 588   | 604   | 1717  | 1768  | 203   | 217   |       |    |
| BATF3 | HGNC:2891 | basic leucine zipper ATF-like transcription factor 3 |                            | 541   | 553   | 2619  | 2671  | 1098  | 1118   | 983   | 1013  | 2611  | 2673  | 437   | 446   |       |    |
| BP1FB | HGNC:1610 | BPI fold containing family B member 1                | Epithelial cells           | 94    | 98    | 333   | 352   | 337   | 348    | 196   | 216   | 1188  | 1296  | 81    | 83    |       |    |
| C1QA  | HGNC:1241 | complement C1q A chain                               | Macrophages and monocytes  | 20720 | 27989 | 37792 | 45071 | 17616 | 20129  | 20676 | 24133 | 36007 | 40708 | 6548  | 7757  |       |    |
| C1QB  | HGNC:1242 | complement C1q B chain                               | Macrophages and monocytes  | 12297 | 14766 | 51493 | 58737 | 17542 | 19111  | 18151 | 20123 | 47053 | 53019 | 5310  | 5947  |       |    |
| C2    | HGNC:1248 | complement C2                                        |                            | 738   | 783   | 896   | 927   | 497   | 515    | 548   | 576   | 1156  | 1211  | 291   | 305   |       |    |
| C3    | HGNC:1318 | complement C3                                        |                            | 5183  | 6047  | 3892  | 4086  | 1834  | 2012   | 2738  | 2956  | 4882  | 5191  | 2884  | 3135  |       |    |
| C4BP  | HGNC:1325 | complement component 4 binding protein alpha         |                            | 382   | 402   | 1406  | 1452  | 650   | 668    | 475   | 487   | 1589  | 1642  | 704   | 735   |       |    |
| CAV1  | HGNC:1527 | caveolin 1                                           |                            | 3742  | 3999  | 1940  | 2007  | 1098  | 1129   | 1671  | 1737  | 5318  | 5526  | 11368 | 12788 |       |    |
| CCL17 | HGNC:1061 | C-C motif chemokine ligand 17                        |                            | 249   | 261   | 1159  | 1246  | 1024  | 1083   | 424   | 447   | 1566  | 1683  | 300   | 311   |       |    |
| CCL2  | HGNC:1061 | C-C motif chemokine ligand 2                         |                            | 1131  | 1237  | 4239  | 4377  | 1970  | 2072   | 589   | 615   | 11301 | 12757 | 1651  | 1759  |       |    |
| CCL5  | HGNC:1063 | C-C motif chemokine ligand 5                         |                            | 758   | 795   | 938   | 961   | 995   | 1024   | 537   | 554   | 1338  | 1396  | 493   | 510   |       |    |
| CCL8  | HGNC:1063 | C-C motif chemokine ligand 8                         |                            | 254   | 270   | 1143  | 1161  | 578   | 595    | 403   | 417   | 2857  | 3001  | 146   | 149   |       |    |
| CCR2  | HGNC:1603 | C-C motif chemokine receptor 2                       |                            | 2594  | 2753  | 19388 | 20595 | 8426  | 8872   | 7505  | 7945  | 29142 | 31621 | 3473  | 3643  |       |    |
| CCR4  | HGNC:1605 | C-C motif chemokine receptor 4                       |                            | 408   | 425   | 4728  | 4880  | 2670  | 2808   | 1730  | 1809  | 6289  | 6509  | 491   | 507   |       |    |
| CCR5  | HGNC:1606 | C-C motif chemokine receptor 5                       |                            | 1710  | 1785  | 12777 | 13338 | 4988  | 5223   | 4221  | 4416  | 15676 | 16525 | 1685  | 1767  |       |    |
| CCR6  | HGNC:1607 | C-C motif chemokine receptor 6                       |                            | 136   | 142   | 1197  | 1219  | 661   | 682    | 428   | 442   | 1195  | 1223  | 206   | 212   |       |    |
| CCR7  | HGNC:1608 | C-C motif chemokine receptor 7                       |                            | 577   | 597   | 2161  | 2210  | 1791  | 1853   | 630   | 654   | 3593  | 3686  | 565   | 579   |       |    |
| CD14  | HGNC:1628 | CD14 molecule                                        | Macrophages and monocytes  | 1773  | 1852  | 1668  | 1700  | 1539  | 1575   | 759   | 782   | 2163  | 2197  | 498   | 514   |       |    |
| CD16  | HGNC:1631 | CD163 molecule                                       | Macrophages and monocytes  | 2316  | 2483  | 6400  | 6949  | 3026  | 3275   | 3698  | 4010  | 9813  | 10817 | 1383  | 1488  |       |    |
| CD19  | HGNC:1633 | CD19 molecule                                        | B cells                    | 761   | 785   | 10762 | 11125 | 3179  | 3273   | 3477  | 3608  | 8204  | 8483  | 576   | 590   |       |    |
| CD1C  | HGNC:1636 | CD1c molecule                                        | Dendritic cells            | 3239  | 3373  | 4063  | 4182  | 3639  | 3760   | 3177  | 3294  | 3550  | 3629  | 1215  | 1249  |       |    |
| CD20  | HGNC:1641 | CD209 molecule                                       |                            | 384   | 401   | 1780  | 1826  | 1131  | 1172   | 717   | 736   | 2537  | 2620  | 399   | 410   |       |    |
| GYPE  | HGNC:4702 | glycophorin A (MNS blood group)                      | Erythrocyte                | 161   | 169   | 2335  | 2409  | 1410  | 1447   | 462   | 477   | 3642  | 3775  | 101   | 102   |       |    |
| CD27  | HGNC:1763 | CD274 molecule                                       |                            | 237   | 241   | 1010  | 1023  | 498   | 505    | 413   | 429   | 1149  | 1175  | 192   | 198   |       |    |
| CD28  | HGNC:1653 | CD28 molecule                                        |                            | 257   | 266   | 2219  | 2310  | 1178  | 1238   | 792   | 821   | 2634  | 2731  | 287   | 297   |       |    |
| CD30  | HGNC:2887 | CD300e molecule                                      |                            | 266   | 269   | 942   | 969   | 639   | 654    | 713   | 733   | 1574  | 1612  | 191   | 200   |       |    |
| CD34  | HGNC:1662 | CD34 molecule                                        | Vascular endothelial cells | 3195  | 3371  | 4713  | 4856  | 2423  | 2511   | 2047  | 2132  | 5684  | 5884  | 5157  | 5513  |       |    |
| CD3D  | HGNC:1673 | CD3d molecule                                        | T cells                    | 1154  | 1216  | 5081  | 5261  | 3234  | 3360   | 2383  | 2496  | 8192  | 8618  | 1223  | 1282  |       |    |
| CD3E  | HGNC:1674 | CD3e molecule                                        | T cells                    | 451   | 464   | 1159  | 1177  | 860   | 879    | 383   | 388   | 1567  | 1599  | 603   | 618   |       |    |
| CD3G  | HGNC:1675 | CD3g molecule                                        | T cells                    | 44    | 44    | 109   | 109   | 16    | 16     | 17    | 17    | 54    | 54    | 61    | 61    |       |    |
| CD4   | HGNC:1678 | CD4 molecule                                         | T cells                    | 9244  | 9854  | 32619 | 34880 | 15017 | 15908  | 15346 | 16465 | 45532 | 50512 | 6899  | 7329  |       |    |
| CD40  | HGNC:1191 | CD40 molecule                                        |                            | 1284  | 1323  | 6802  | 7021  | 2935  | 3042   | 2489  | 2584  | 9651  | 10041 | 1100  | 1128  |       |    |
| CD40  | HGNC:1193 | CD40 ligand                                          |                            | 785   | 827   | 12160 | 12659 | 6193  | 6460   | 3159  | 3307  | 25458 | 27608 | 633   | 663   |       |    |
| CD44  | HGNC:1681 | CD44 molecule (Indian blood group)                   |                            | 3032  | 3218  | 4303  | 4473  | 2278  | 2369   | 2170  | 2271  | 12624 | 13517 | 5280  | 5692  |       |    |
| CD68  | HGNC:1693 | CD68 molecule                                        | Macrophages and monocytes  | 6117  | 6731  | 15311 | 16792 | 12141 | 13295  | 8779  | 9502  | 27401 | 30488 | 6359  | 7170  |       |    |
| CD7   | HGNC:1695 | CD7 molecule                                         |                            | 645   | 676   | 4375  | 4464  | 1954  | 2005   | 1387  | 1432  | 3516  | 3618  | 455   | 470   |       |    |
| CD79  | HGNC:1698 | CD79a molecule                                       | B cells                    | 1664  | 1762  | 21479 | 22599 | 6222  | 6448   | 4727  | 4911  | 15235 | 15962 | 800   | 842   |       |    |
| CD79  | HGNC:1699 | CD79b molecule                                       | B cells                    | 1428  | 1506  | 4402  | 4647  | 3115  | 3286   | 2752  | 2877  | 6391  | 6771  | 1968  | 2061  |       |    |
| CD80  | HGNC:1700 | CD80 molecule                                        |                            | 653   | 676   | 3873  | 3981  | 3291  | 3383   | 1595  | 1652  | 5186  | 5335  | 514   | 534   |       |    |
| CD83  | HGNC:1703 | CD83 molecule                                        |                            | 562   | 588   | 3093  | 3184  | 1163  | 1202   | 1034  | 1077  | 3142  | 3256  | 666   | 692   |       |    |
| CD86  | HGNC:1705 | CD86 molecule                                        |                            | 1     | 1     | 6     | 6     | 5     | 5      | 6     | 6     | 7     | 7     | 4     | 4     |       |    |
| CD8A  | HGNC:1706 | CD8a molecule                                        | T cells                    | 690   | 717   | 3340  | 3433  | 2467  | 2550   | 943   | 971   | 3632  | 3738  | 515   | 534   |       |    |
| CD8B  | HGNC:1707 | CD8b molecule                                        | T cells                    | 177   | 182   | 638   | 653   | 684   | 710    | 236   | 247   | 762   | 788   | 173   | 182   |       |    |
| CEAC  | HGNC:1820 | CEA cell adhesion molecule 8                         | Granulocytes               | 592   | 623   | 12368 | 12895 | 5524  | 5723   | 2825  | 2937  | 15840 | 16754 | 477   | 493   |       |    |
| CFP   | HGNC:8864 | complement factor properdin                          |                            | 249   | 259   | 866   | 886   | 522   | 537    | 253   | 259   | 836   | 857   | 168   | 172   |       |    |
| CFTR  | HGNC:1884 | CF transmembrane conductance regulator               | Ionocytes                  | 76    | 78    | 664   | 685   | 362   | 372    | 315   | 318   | 935   | 948   | 88    | 92    |       |    |
| CLDN  | HGNC:2047 | claudin 5                                            | Vascular endothelial cells | 46145 | 58039 | 81977 | 95546 | 76968 | 95416  | 49549 | 59676 | 86131 | 1E+05 | 38423 | 49829 |       |    |
| CLEC1 | HGNC:1691 | C-type lectin domain containing 10A                  |                            | 1432  | 1507  | 13952 | 14589 | 8036  | 8443   | 4628  | 4847  | 18709 | 19859 | 1189  | 1257  |       |    |
| CLEC5 | HGNC:2054 | C-type lectin domain containing 5A                   |                            | 155   | 164   | 606   | 618   | 561   | 567    | 330   | 338   | 1186  | 1225  | 249   | 255   |       |    |
| CLEC7 | HGNC:2670 | C-type lectin domain containing 9A                   | Dendritic cells            | 87    | 89    | 1244  | 1337  | 761   | 796    | 326   | 337   | 1788  | 1901  | 132   | 139   |       |    |
| COL1  | HGNC:2197 | collagen type I alpha 1 chain                        | Fibroblasts                | 7620  | 10687 | 21508 | 31708 | 4084  | 4627   | 2387  | 2792  | 25152 | 32237 | 4447  | 4884  |       |    |
| COL1  | HGNC:2198 | collagen type I alpha 2 chain                        | Fibroblasts                | 17445 | 26898 | 37213 | 55927 | 7678  | 8625   | 9522  | 11572 | 48486 | 64941 | 20266 | 24613 |       |    |
| COL6  | HGNC:2211 | collagen type VI alpha 1 chain                       |                            | 4358  | 4725  | 6794  | 7095  | 4101  | 4285   | 4035  | 4278  | 15730 | 16919 | 4344  | 4608  |       |    |
| CPA3  | HGNC:2298 | carboxypeptidase A3                                  | Granulocytes               | 172   | 184   | 784   | 830   | 528   | 540    | 334   | 352   | 1152  | 1190  | 536   | 568   |       |    |
| CR1   | HGNC:2334 | complement C3b/C4b receptor 1 (Knops blood group)    |                            | 149   | 156   | 535   | 551   | 552   | 567    | 266   | 273   | 924   | 960   | 177   | 183   |       |    |
| CSF3F | HGNC:2439 | colony stimulating factor 3 receptor                 |                            | 1207  | 1255  | 4135  | 4515  | 2462  | 2652   | 2288  | 2417  | 5857  | 6299  | 978   | 1027  |       |    |
| CTSB  | HGNC:2527 | cathepsin B                                          |                            | 7288  | 8303  | 13176 | 14716 | 6499  | 7033   | 9760  | 11249 | 19731 | 22099 | 6933  | 7722  |       |    |



|       |           |                                                                    |                     |       |       |       |       |       |       |       |       |       |       |       |       |
|-------|-----------|--------------------------------------------------------------------|---------------------|-------|-------|-------|-------|-------|-------|-------|-------|-------|-------|-------|-------|
| CXCL1 | HGNC:1064 | C-X-C motif chemokine ligand 5                                     |                     | 115   | 124   | 802   | 821   | 690   | 707   | 380   | 390   | 1272  | 1307  | 300   | 318   |
| CXCL1 | HGNC:6025 | C-X-C motif chemokine ligand 8                                     |                     | 584   | 613   | 6944  | 7172  | 2635  | 2737  | 2163  | 2224  | 7876  | 8142  | 593   | 612   |
| CXCL1 | HGNC:7098 | C-X-C motif chemokine ligand 9                                     |                     | 910   | 989   | 1887  | 1962  | 962   | 994   | 366   | 379   | 2635  | 2831  | 1031  | 1327  |
| CXCR  | HGNC:6027 | C-X-C motif chemokine receptor 2                                   |                     | 384   | 400   | 1190  | 1233  | 1065  | 1097  | 660   | 680   | 1723  | 1785  | 351   | 361   |
| CXCR  | HGNC:4540 | C-X-C motif chemokine receptor 3                                   |                     | 1580  | 1652  | 13483 | 14118 | 7375  | 7700  | 3969  | 4144  | 15472 | 16266 | 1170  | 1219  |
| CXCR  | HGNC:2561 | C-X-C motif chemokine receptor 4                                   |                     | 409   | 426   | 447   | 453   | 430   | 435   | 363   | 368   | 907   | 927   | 677   | 705   |
| CXCR  | HGNC:1060 | C-X-C motif chemokine receptor 5                                   |                     | 1262  | 1299  | 22082 | 23246 | 6761  | 6969  | 4409  | 4551  | 26834 | 28867 | 608   | 619   |
| CXCR  | HGNC:1664 | C-X-C motif chemokine receptor 6                                   |                     | 1706  | 1803  | 18547 | 19774 | 7365  | 7789  | 7532  | 8136  | 14835 | 15713 | 886   | 911   |
| CYP21 | HGNC:2632 | cytochrome P450 family 2 subfamily F member 1                      |                     | 126   | 131   | 580   | 585   | 359   | 365   | 233   | 238   | 742   | 755   | 148   | 148   |
| DDX5  | HGNC:1910 | DExD/H-box helicase 58                                             |                     | 348   | 351   | 970   | 975   | 704   | 723   | 468   | 478   | 2246  | 2293  | 398   | 408   |
| DES   | HGNC:2770 | desmin                                                             | Smooth muscle cells | 2105  | 2251  | 6468  | 6681  | 4351  | 4512  | 2619  | 2745  | 11073 | 12074 | 3562  | 4077  |
| EDN1  | HGNC:3176 | endothelin 1                                                       |                     | 968   | 1019  | 1213  | 1232  | 810   | 824   | 654   | 682   | 3617  | 3760  | 2183  | 2341  |
| EOM1  | HGNC:3372 | eomesodermin                                                       |                     | 872   | 913   | 12299 | 12803 | 6617  | 6955  | 3231  | 3372  | 21051 | 22484 | 619   | 644   |
| EPCAM | HGNC:1152 | epithelial cell adhesion molecule                                  | Epithelial cells    | 473   | 498   | 1318  | 1362  | 756   | 781   | 686   | 718   | 1665  | 1730  | 566   | 584   |
| EREG  | HGNC:3443 | epiregulin                                                         |                     | 151   | 152   | 900   | 952   | 696   | 726   | 412   | 435   | 1556  | 1636  | 222   | 234   |
| F13A  | HGNC:3531 | coagulation factor XIII A chain                                    |                     | 647   | 686   | 2258  | 2430  | 1186  | 1244  | 773   | 816   | 2851  | 3037  | 467   | 484   |
| FABP  | HGNC:3559 | fatty acid binding protein 4                                       |                     | 44    | 46    | 565   | 576   | 347   | 356   | 226   | 232   | 724   | 742   | 241   | 254   |
| FBLN  | HGNC:3600 | fibulin 1                                                          |                     | 13160 | 18118 | 12658 | 14019 | 3117  | 3539  | 7320  | 8448  | 19702 | 22383 | 11966 | 14313 |
| FCGR  | HGNC:3613 | Fc fragment of IgG receptor Ia                                     |                     | 136   | 136   | 452   | 455   | 186   | 188   | 82    | 82    | 317   | 320   | 60    | 62    |
| FCGR  | HGNC:3616 | Fc fragment of IgG receptor IIa                                    |                     | 920   | 953   | 4115  | 4245  | 2500  | 2572  | 1171  | 1201  | 6552  | 6751  | 986   | 1026  |
| FCGR  | HGNC:3618 | Fc fragment of IgG receptor IIb                                    |                     | 499   | 524   | 1164  | 1200  | 842   | 858   | 487   | 507   | 1804  | 1852  | 442   | 456   |
| FCGR  | HGNC:3620 | Fc fragment of IgG receptor IIIb                                   |                     | 2732  | 2890  | 5795  | 5991  | 2908  | 3009  | 1843  | 1929  | 9812  | 10392 | 1547  | 1656  |
| FKBP  | HGNC:1862 | FKBP prolyl isomerase 11                                           |                     | 1764  | 1864  | 10293 | 10777 | 10756 | 11504 | 4846  | 5096  | 20117 | 21717 | 1634  | 1706  |
| FOLR  | HGNC:3793 | folate receptor beta                                               |                     | 1084  | 1129  | 1803  | 1837  | 1177  | 1206  | 792   | 814   | 2267  | 2311  | 661   | 679   |
| FOXP1 | HGNC:3815 | forkhead box J1                                                    | Ionocytes           | 409   | 428   | 3688  | 3804  | 1886  | 1963  | 1337  | 1384  | 4358  | 4513  | 343   | 354   |
| FOXP1 | HGNC:3816 | forkhead box J1                                                    | Ciliated cells      | 3     | 3     | 3     | 3     | 3     | 3     | 2     | 2     | 18    | 18    |       |       |
| FOXP2 | HGNC:2139 | forkhead box N4                                                    |                     | 123   | 128   | 489   | 503   | 432   | 437   | 228   | 238   | 624   | 645   | 138   | 141   |
| FOXP3 | HGNC:6106 | forkhead box P3                                                    | T cells             | 2743  | 2853  | 24051 | 25729 | 6922  | 7186  | 4868  | 5058  | 13528 | 14139 | 2291  | 2367  |
| FURIN | HGNC:8568 | furin, paired basic amino acid cleaving enzyme                     |                     | 2131  | 2233  | 10658 | 11076 | 4796  | 4976  | 5064  | 5313  | 14298 | 14921 | 2722  | 2845  |
| FUT4  | HGNC:4015 | fucosyltransferase 4                                               |                     | 969   | 1012  | 15533 | 16926 | 7541  | 8103  | 2887  | 3034  | 19700 | 21747 | 886   | 917   |
| GATA  | HGNC:4171 | GATA binding protein 2                                             | Granulocytes        | 749   | 779   | 3271  | 3331  | 1402  | 1431  | 832   | 848   | 3459  | 3506  | 790   | 812   |
| GATA  | HGNC:4172 | GATA binding protein 3                                             |                     | 339   | 350   | 2641  | 2707  | 1199  | 1231  | 701   | 713   | 3269  | 3374  | 329   | 338   |
| CSF3  | HGNC:2438 | colony stimulating factor 3                                        |                     | 6513  | 7005  | 56710 | 64391 | 16965 | 18195 | 14800 | 15962 | 39064 | 43311 | 4914  | 5203  |
| GJA5  | HGNC:4279 | gap junction protein alpha 5                                       |                     | 4072  | 4323  | 14580 | 15272 | 6626  | 6995  | 5248  | 5544  | 26618 | 28678 | 3351  | 3669  |
| GNLY  | HGNC:4414 | granulysin                                                         |                     | 1299  | 1436  | 5564  | 5748  | 2419  | 2498  | 1598  | 1676  | 7443  | 7725  | 622   | 671   |
| GPR1  | HGNC:3128 | G protein-coupled receptor 183                                     |                     | 157   | 159   | 444   | 455   | 547   | 560   | 266   | 276   | 663   | 680   | 238   | 248   |
| GSTA1 | HGNC:4626 | glutathione S-transferase alpha 1                                  | Ciliated cells      | 305   | 315   | 1094  | 1120  | 949   | 972   | 679   | 702   | 2015  | 2069  | 418   | 431   |
| GZMK  | HGNC:4711 | granzyme K                                                         |                     | 2384  | 2493  | 33257 | 35891 | 18686 | 20077 | 7559  | 7977  | 66279 | 78630 | 1577  | 1632  |
| HLA-D | HGNC:4944 | major histocompatibility complex, class II, DQ beta 1              |                     | 1320  | 1390  | 1267  | 1335  | 790   | 823   | 970   | 1015  | 1431  | 1507  | 1331  | 1423  |
| HLA-D | HGNC:4954 | major histocompatibility complex, class II, DR beta 6 (pseudogene) |                     | 769   | 799   | 3451  | 3546  | 2105  | 2175  | 1457  | 1492  | 4225  | 4382  | 597   | 621   |
| HPGD  | HGNC:1789 | hematopoietic prostaglandin D synthase                             |                     | 91    | 92    | 470   | 486   | 495   | 514   | 208   | 214   | 673   | 697   | 169   | 172   |
| ICAM  | HGNC:5344 | intercellular adhesion molecule 1                                  |                     | 2515  | 2710  | 7157  | 7385  | 2243  | 2313  | 2848  | 2976  | 6938  | 7172  | 2268  | 2381  |
| ICOS  | HGNC:5351 | inducible T cell costimulator                                      |                     | 201   | 202   | 1277  | 1310  | 586   | 601   | 384   | 401   | 1182  | 1213  | 210   | 215   |
| ICOSL | HGNC:1708 | inducible T cell costimulator ligand                               |                     | 2901  | 3035  | 32600 | 35066 | 12841 | 13580 | 12265 | 13179 | 27279 | 29152 | 2238  | 2328  |
| IDO1  | HGNC:6059 | indoleamine 2,3-dioxygenase 1                                      |                     | 640   | 683   | 965   | 986   | 777   | 802   | 637   | 668   | 5481  | 5824  | 337   | 361   |
| IFIH1 | HGNC:1887 | interferon induced with helicase C domain 1                        |                     | 421   | 434   | 728   | 743   | 433   | 446   | 373   | 380   | 1621  | 1670  | 424   | 435   |
| IFITM | HGNC:5413 | interferon induced transmembrane protein 2                         |                     | 8012  | 8583  | 16017 | 16883 | 7018  | 7363  | 9795  | 10406 | 28790 | 31093 | 8062  | 8677  |
| IFITM | HGNC:5414 | interferon induced transmembrane protein 3                         |                     | 16452 | 18575 | 17428 | 18617 | 8998  | 9577  | 19021 | 21300 | 64561 | 77842 | 12481 | 13753 |
| IFNA2 | HGNC:5423 | interferon alpha 2                                                 |                     | 33    | 33    | 314   | 326   | 281   | 293   | 133   | 135   | 450   | 458   | 58    | 60    |
| IFNB1 | HGNC:5434 | interferon beta 1                                                  |                     | 139   | 143   | 1292  | 1319  | 641   | 656   | 431   | 453   | 1382  | 1421  | 134   | 136   |
| IFNE  | HGNC:1816 | interferon epsilon                                                 |                     | 54    | 57    | 258   | 264   | 185   | 188   | 98    | 102   | 210   | 219   | 57    | 57    |
| IFNG  | HGNC:5438 | interferon gamma                                                   |                     | 525   | 555   | 4161  | 4328  | 3203  | 3374  | 1638  | 1713  | 5996  | 6342  | 357   | 372   |
| IFNG  | HGNC:5439 | interferon gamma receptor 1                                        |                     | 1795  | 1876  | 1465  | 1496  | 724   | 744   | 1654  | 1711  | 3837  | 3974  | 3034  | 3194  |
| IFNG  | HGNC:5440 | interferon gamma receptor 2                                        |                     | 713   | 748   | 1920  | 1983  | 932   | 959   | 879   | 916   | 3236  | 3362  | 1227  | 1273  |
| IGKC  | HGNC:5716 | immunoglobulin kappa constant                                      |                     | 74828 | 2E+05 | 74799 | 1E+05 | 55923 | 1E+05 | 28740 | 50571 | 1E+05 | 3E+05 | 10118 | 15596 |
| IGLL5 | HGNC:3847 | immunoglobulin lambda like polypeptide 5                           |                     | 2009  | 2643  | 7002  | 7721  | 4199  | 4514  | 3505  | 3873  | 11634 | 13561 | 1240  | 1439  |
| IL10  | HGNC:5962 | interleukin 10                                                     |                     | 79    | 81    | 385   | 388   | 209   | 211   | 193   | 199   | 395   | 401   | 72    | 75    |
| IL10R | HGNC:5965 | interleukin 10 receptor subunit beta                               |                     | 833   | 871   | 5833  | 6008  | 3274  | 3368  | 2142  | 2241  | 9732  | 10091 | 979   | 1033  |
| IL17A | HGNC:5981 | interleukin 17A                                                    |                     | 378   | 391   | 4253  | 4397  | 1900  | 1966  | 956   | 979   | 4913  | 5080  | 290   | 297   |
| IL1A  | HGNC:5991 | interleukin 1 alpha                                                |                     | 488   | 501   | 6524  | 6789  | 2731  | 2864  | 1406  | 1468  | 7135  | 7411  | 392   | 403   |
| IL1B  | HGNC:5992 | interleukin 1 beta                                                 |                     | 711   | 735   | 3369  | 3432  | 1390  | 1419  | 1180  | 1226  | 3375  | 3448  | 448   | 458   |
| IL2   | HGNC:6001 | interleukin 2                                                      |                     | 127   | 131   | 2079  | 2133  | 1121  | 1190  | 735   | 767   | 2614  | 2702  | 159   | 163   |
| IL22  | HGNC:1490 | interleukin 22                                                     |                     | 275   | 278   | 3039  | 3120  | 1750  | 1813  | 1074  | 1115  | 3001  | 3090  | 232   | 239   |
| IL27  | HGNC:1915 | interleukin 27                                                     |                     | 239   | 249   | 2350  | 2411  | 924   | 950   | 798   | 819   | 2139  | 2190  | 185   | 191   |
| IL2RA | HGNC:6008 | interleukin 2 receptor subunit alpha                               |                     | 2346  | 2431  | 10989 | 11338 | 3998  | 4103  | 4454  | 4625  | 12931 | 13390 | 1482  | 1532  |
| IL33  | HGNC:1602 | interleukin 33                                                     |                     | 197   | 199   | 394   | 399   | 218   | 221   | 176   | 180   | 620   | 635   | 369   | 384   |
| IL3RA | HGNC:3563 | interleukin 3 receptor subunit alpha                               |                     | 946   | 982   | 5462  | 5666  | 2165  | 2228  | 1478  | 1530  | 6942  | 7183  | 1201  | 1246  |
| IL4   | HGNC:6014 | interleukin 4                                                      |                     | 473   | 491   | 3969  | 4146  | 1787  | 1862  | 1503  | 1577  | 3354  | 3519  | 319   | 325   |
| IL5   | HGNC:6016 | interleukin 5                                                      |                     | 343   | 355   | 1668  | 1720  | 964   | 987   | 578   | 592   | 1304  | 1355  | 289   | 299   |
| IL6   | HGNC:6018 | interleukin 6                                                      |                     | 319   | 333   | 1430  | 1471  | 1062  | 1094  | 527   | 546   | 4160  | 4399  | 1266  | 1381  |
| IL6R  | HGNC:6019 | interleukin 6 receptor                                             |                     | 554   | 573   | 3306  | 3366  | 1139  | 1155  | 1114  | 1146  | 2536  | 2600  | 685   | 717   |
| IL6ST | HGNC:6021 | interleukin 6 signal transducer                                    |                     | 688   | 715   | 1378  | 1415  | 632   | 649   | 685   | 709   | 3566  | 3700  | 2331  | 2450  |
| IL7   | HGNC:6023 | interleukin 7                                                      |                     | 287   | 297   | 1906  | 1950  | 1214  | 1250  | 802   | 827   | 2714  | 2797  | 338   | 350   |
| IL7R  | HGNC:6024 | interleukin 7 receptor                                             |                     | 3600  | 3920  | 4640  | 4800  | 1612  | 1653  | 2247  | 2367  | 3929  | 4051  | 2181  | 2327  |
| INMT  | HGNC:6069 | indolethylamine N-methyltransferase                                | Fibroblasts         | 1312  | 1396  | 1323  | 1387  | 924   | 959   | 1260  | 1323  | 3237  | 3408  | 5878  | 6438  |
| IRF4  | HGNC:6119 | interferon regulatory factor 4                                     |                     | 902   | 921   | 4295  | 4375  | 1593  | 1623  | 1110  | 1134  | 3447  | 3509  | 454   | 464   |
| ISG15 | HGNC:4053 | ISG15 ubiquitin like modifier                                      |                     | 1784  | 1866  | 7142  | 7480  | 4105  | 4337  | 4103  | 4309  | 15226 | 16219 | 1369  | 1443  |
| ITGAX | HGNC:6152 | integrin subunit alpha X                                           | Dendritic cells     | 915   | 949   | 1519  | 1546  | 1110  | 1130  | 1644  | 1706  | 2850  | 2930  | 730   | 765   |
| ITLN1 | HGNC:1825 | intelectin 1                                                       |                     | 250   | 259   | 2774  | 2848  | 1509  | 1544  | 741   | 766   | 3299  | 3378  | 248   | 251   |

|                   |                                                             |                            |       |       |       |       |       |       |       |       |       |       |       |       |
|-------------------|-------------------------------------------------------------|----------------------------|-------|-------|-------|-------|-------|-------|-------|-------|-------|-------|-------|-------|
| JCHAI HGNC:5713   | joining chain of multimeric IgA and IgM                     |                            | 9916  | 21499 | 10626 | 14866 | 6728  | 7953  | 2628  | 3794  | 19176 | 35488 | 1454  | 3375  |
| KIT HGNC:6342     | KIT proto-oncogene, receptor tyrosine kinase                |                            | 482   | 499   | 978   | 996   | 730   | 757   | 464   | 480   | 2147  | 2212  | 2120  | 2278  |
| KLRB HGNC:6373    | killer cell lectin like receptor B1                         |                            | 311   | 329   | 1521  | 1556  | 888   | 906   | 608   | 625   | 1945  | 1995  | 304   | 317   |
| KLRC HGNC:6375    | killer cell lectin like receptor C2                         | NK cells                   | 131   | 137   | 484   | 499   | 494   | 502   | 323   | 339   | 675   | 695   | 129   | 133   |
| KLRD HGNC:6378    | killer cell lectin like receptor D1                         | NK cells                   | 536   | 562   | 4258  | 4482  | 1868  | 1931  | 986   | 1020  | 5417  | 5665  | 443   | 456   |
| KRT1 HGNC:6415    | keratin 13                                                  |                            | 184   | 202   | 880   | 902   | 534   | 549   | 396   | 411   | 1116  | 1158  | 112   | 113   |
| KRT1 HGNC:6416    | keratin 14                                                  | Basal cells                | 265   | 270   | 2960  | 3028  | 1472  | 1513  | 746   | 768   | 3546  | 3641  | 278   | 288   |
| KRT1 HGNC:6421    | keratin 15                                                  |                            | 840   | 901   | 5259  | 5485  | 2733  | 2867  | 1606  | 1684  | 6785  | 7147  | 537   | 553   |
| KRT1 HGNC:6436    | keratin 19                                                  |                            | 4295  | 5157  | 7262  | 7681  | 4066  | 4336  | 2867  | 3044  | 17270 | 20219 | 3220  | 3432  |
| KRT5 HGNC:6442    | keratin 5                                                   | Basal cells                | 186   | 213   | 589   | 602   | 588   | 705   | 275   | 288   | 3127  | 4635  | 112   | 113   |
| LEF1 HGNC:6551    | lymphoid enhancer binding factor 1                          |                            | 214   | 220   | 1782  | 1824  | 1187  | 1238  | 522   | 544   | 3048  | 3185  | 603   | 630   |
| LGR6 HGNC:1971    | leucine rich repeat containing G protein-coupled receptor 6 |                            | 499   | 516   | 3062  | 3191  | 1629  | 1696  | 1002  | 1054  | 3142  | 3296  | 431   | 448   |
| LILRA HGNC:1550   | leukocyte immunoglobulin like receptor A4                   |                            | 206   | 210   | 1596  | 1636  | 827   | 850   | 568   | 577   | 1548  | 1576  | 173   | 176   |
| LST1 HGNC:1418    | leukocyte specific transcript 1                             |                            | 5422  | 5762  | 68058 | 78104 | 25499 | 27823 | 13921 | 14974 | 72496 | 84944 | 4255  | 4509  |
| LTF HGNC:6720     | lactoferrin                                                 |                            | 147   | 161   | 1482  | 1530  | 767   | 795   | 322   | 332   | 2419  | 2485  | 136   | 137   |
| LYVE1 HGNC:1468   | lymphatic vessel endothelial hyaluronan receptor 1          | Lymphatic endothelial      | 336   | 352   | 608   | 625   | 308   | 317   | 214   | 221   | 376   | 385   | 740   | 786   |
| CSF1 HGNC:2432    | colony stimulating factor 1                                 |                            | 514   | 528   | 1226  | 1251  | 474   | 479   | 314   | 320   | 1096  | 1113  | 344   | 348   |
| MGP HGNC:7060     | matrix Gla protein                                          |                            | 9428  | 10545 | 34860 | 38829 | 10408 | 10997 | 6878  | 7373  | 22754 | 24270 | 10835 | 11935 |
| MKI6 HGNC:7107    | marker of proliferation Ki-67                               |                            | 61    | 62    | 180   | 183   | 191   | 194   | 70    | 71    | 348   | 359   | 59    | 61    |
| MRC1 HGNC:7228    | mannose receptor C-type 1                                   |                            | 1143  | 1197  | 5250  | 5446  | 2179  | 2227  | 1635  | 1693  | 6191  | 6375  | 1428  | 1522  |
| MS4A HGNC:7315    | membrane spanning 4-domains A1                              | B cells                    | 132   | 133   | 1053  | 1067  | 709   | 725   | 400   | 406   | 1693  | 1727  | 110   | 114   |
| MS4A HGNC:7316    | membrane spanning 4-domains A2                              | Granulocytes               | 299   | 305   | 3172  | 3266  | 1674  | 1714  | 833   | 857   | 4015  | 4129  | 401   | 414   |
| MSLN HGNC:7371    | mesothelin                                                  | Mesothelial cells          | 1191  | 1294  | 3928  | 4078  | 1435  | 1474  | 913   | 964   | 3332  | 3449  | 1717  | 1799  |
| MUC1 HGNC:7508    | mucin 1, cell surface associated                            |                            | 955   | 1021  | 662   | 686   | 638   | 663   | 579   | 609   | 2614  | 2738  | 1132  | 1189  |
| MUC5 HGNC:7515    | mucin 5AC, oligomeric mucus/gel-forming                     | Epithelial cells           | 145   | 158   | 799   | 827   | 453   | 462   | 502   | 528   | 987   | 1014  | 154   | 157   |
| MUC5 HGNC:7516    | mucin 5B, oligomeric mucus/gel-forming                      | Epithelial cells           | 1310  | 1456  | 14210 | 14781 | 7453  | 7735  | 4319  | 4526  | 24767 | 26669 | 853   | 878   |
| MX1 HGNC:7532     | MX dynamin like GTPase 1                                    |                            | 1579  | 1638  | 7232  | 7514  | 2792  | 2877  | 3514  | 3655  | 11341 | 11882 | 1414  | 1471  |
| NCAN HGNC:7656    | neural cell adhesion molecule 1                             | NK cells                   | 6110  | 6557  | 40906 | 44692 | 27697 | 30467 | 17120 | 18732 | 58792 | 66620 | 3296  | 3515  |
| NKG7 HGNC:7830    | natural killer cell granule protein 7                       |                            | 1352  | 1492  | 1162  | 1192  | 1060  | 1110  | 837   | 875   | 2043  | 2111  | 758   | 818   |
| NRP1 HGNC:8004    | neuropilin 1                                                |                            | 4267  | 4523  | 4071  | 4200  | 2177  | 2264  | 2922  | 3045  | 11280 | 11857 | 4047  | 4282  |
| PAX5 HGNC:8619    | paired box 5                                                |                            | 270   | 277   | 2099  | 2158  | 1711  | 1760  | 566   | 581   | 3210  | 3333  | 253   | 264   |
| PCSK HGNC:1730    | proprotein convertase subtilisin/kexin type 1 inhibitor     |                            | 4234  | 4500  | 18102 | 19090 | 9788  | 10407 | 9194  | 9843  | 17936 | 18870 | 3926  | 4233  |
| PDCD HGNC:8760    | programmed cell death 1                                     |                            | 5017  | 5317  | 14253 | 14860 | 11119 | 11612 | 6214  | 6484  | 10882 | 11277 | 2413  | 2483  |
| PECAM1 HGNC:8823  | platelet and endothelial cell adhesion molecule 1           | Vascular endothelial cells | 538   | 551   | 452   | 458   | 308   | 313   | 527   | 533   | 1013  | 1028  | 1484  | 1525  |
| PF4 HGNC:8861     | platelet factor 4                                           |                            | 271   | 309   | 733   | 751   | 584   | 605   | 393   | 424   | 706   | 729   | 94    | 95    |
| PLAC1 HGNC:1925   | placenta associated 8                                       |                            | 1599  | 1703  | 9248  | 9601  | 4682  | 4869  | 2901  | 3038  | 12029 | 12703 | 1279  | 1329  |
| PLIN2 HGNC:248    | perilipin 2                                                 |                            | 741   | 766   | 5024  | 5171  | 2095  | 2158  | 1803  | 1869  | 7434  | 7721  | 939   | 976   |
| PPAR HGNC:9236    | peroxisome proliferator activated receptor gamma            |                            | 582   | 602   | 4635  | 4783  | 2662  | 2744  | 1738  | 1814  | 7013  | 7320  | 1229  | 1305  |
| PRF1 HGNC:9360    | perforin 1                                                  |                            | 672   | 690   | 2647  | 2784  | 1522  | 1595  | 1416  | 1495  | 3888  | 4107  | 538   | 551   |
| PRG4 HGNC:9364    | proteoglycan 4                                              | Macrophages and monocytes  | 1346  | 1483  | 2925  | 3053  | 1535  | 1595  | 1947  | 2081  | 4697  | 4919  | 3845  | 4252  |
| PTN HGNC:9630     | pleiotrophin                                                |                            | 2909  | 3202  | 7876  | 8310  | 4531  | 4858  | 4619  | 5019  | 8072  | 8546  | 2408  | 2577  |
| PTPRB HGNC:9666   | protein tyrosine phosphatase receptor type C                |                            | 1938  | 2015  | 4054  | 4167  | 3043  | 3133  | 1542  | 1591  | 6289  | 6473  | 1931  | 2026  |
| RETN HGNC:2038    | resistin                                                    |                            | 779   | 811   | 7065  | 7348  | 3445  | 3607  | 2932  | 3125  | 9538  | 10016 | 715   | 746   |
| S100 HGNC:1049    | S100 calcium binding protein A8                             |                            | 3361  | 4237  | 4766  | 5142  | 3103  | 3395  | 1839  | 2036  | 8888  | 10537 | 500   | 553   |
| SCGB1A1 HGNC:1252 | secretoglobin family 1A member 1                            | Epithelial cells           | 1865  | 4537  | 5388  | 6536  | 2592  | 3999  | 2288  | 2948  | 9280  | 16352 | 1106  | 3020  |
| SCGB1A3 HGNC:1839 | secretoglobin family 3A member 2                            | Epithelial cells           | 534   | 645   | 1572  | 1622  | 1012  | 1054  | 904   | 988   | 2634  | 2825  | 1687  | 2580  |
| SEMA3A HGNC:1072  | semaphorin 3A                                               |                            | 72    | 73    | 733   | 749   | 364   | 372   | 245   | 253   | 886   | 914   | 139   | 142   |
| SFTA2 HGNC:1838   | surfactant associated 2                                     | Alveolar cells             | 1690  | 1805  | 3864  | 3996  | 1901  | 1990  | 2040  | 2160  | 5024  | 5260  | 1957  | 2057  |
| SFTPA1 HGNC:1079  | surfactant protein A1                                       | Alveolar cells             | 6106  | 8052  | 10922 | 14182 | 7860  | 9860  | 6527  | 8187  | 24407 | 44290 | 18841 | 29304 |
| SFTPA2 HGNC:1079  | surfactant protein A2                                       | Alveolar cells             | 4370  | 5125  | 10027 | 11632 | 4643  | 5192  | 4322  | 4783  | 14103 | 17992 | 7456  | 8821  |
| SFTPC HGNC:1080   | surfactant protein C                                        | Alveolar cells             | 25948 | 69259 | 16766 | 21268 | 8284  | 10209 | 16532 | 26081 | 16118 | 19624 | 35495 | 74526 |
| SLC18A1 HGNC:1093 | solute carrier family 18 member A2                          | Granulocytes               | 217   | 223   | 2954  | 3056  | 1801  | 1871  | 795   | 834   | 4400  | 4559  | 291   | 299   |
| TAGLN HGNC:1155   | transgelin                                                  | Smooth muscle cells        | 345   | 356   | 1388  | 1411  | 915   | 931   | 764   | 792   | 1926  | 1979  | 1234  | 1285  |
| TBX2 HGNC:1159    | T-box transcription factor 21                               |                            | 1202  | 1252  | 5703  | 5876  | 3600  | 3711  | 2502  | 2590  | 7273  | 7523  | 971   | 1004  |
| TGFB1 HGNC:1176   | transforming growth factor beta 1                           |                            | 1562  | 1650  | 2225  | 2276  | 1735  | 1770  | 1231  | 1280  | 3875  | 3965  | 2271  | 2374  |
| TM6SF1 HGNC:1187  | transmembrane serine protease 2                             |                            | 9404  | 10363 | 22628 | 24172 | 23341 | 25544 | 10743 | 11645 | 19259 | 20485 | 6563  | 7089  |
| TNF HGNC:1189     | tumor necrosis factor                                       |                            | 151   | 153   | 622   | 634   | 529   | 544   | 186   | 188   | 972   | 987   | 197   | 203   |
| TP63 HGNC:1597    | tumor protein p63                                           | Basal cells                | 82    | 88    | 413   | 449   | 376   | 401   | 140   | 150   | 549   | 583   | 60    | 61    |
| TPPP1 HGNC:2416   | tubulin polymerization promoting protein family 1 member 1  | Ciliated cells             | 1484  | 1763  | 4075  | 4233  | 1630  | 1767  | 2161  | 2474  | 7056  | 7902  | 1962  | 2064  |
| TPSA1 HGNC:1201   | tryptase alpha/beta 1                                       | Granulocytes               | 4307  | 5425  | 3784  | 3908  | 2953  | 3162  | 4152  | 4676  | 6304  | 6736  | 3633  | 4261  |
| TREM1 HGNC:1776   | triggering receptor expressed on myeloid cells 2            |                            | 1367  | 1428  | 2553  | 2640  | 1472  | 1517  | 1370  | 1424  | 2609  | 2673  | 481   | 500   |
| TRPM1 HGNC:1432   | transient receptor potential cation channel subunit 1       | Brush cells                | 298   | 307   | 2062  | 2103  | 1322  | 1362  | 644   | 665   | 2399  | 2467  | 394   | 409   |
| TUBB1 HGNC:2077   | tubulin beta 4B class IVb                                   | Ciliated cells             | 912   | 956   | 599   | 617   | 512   | 524   | 391   | 397   | 1620  | 1668  | 982   | 1009  |
| TYROBP1 HGNC:1244 | transmembrane immune signaling adaptor TYROBP               |                            | 6913  | 7616  | 14347 | 15209 | 5989  | 6243  | 6699  | 7191  | 15054 | 15909 | 7053  | 8452  |
| VIM HGNC:1269     | vimentin                                                    |                            | 930   | 975   | 3069  | 3156  | 3152  | 3282  | 1261  | 1305  | 2791  | 2868  | 847   | 873   |
| WT1 HGNC:1279     | WT1 transcription factor                                    |                            | 62    | 65    | 245   | 246   | 307   | 316   | 138   | 141   | 455   | 460   | 70    | 73    |
| IL1R1 HGNC:IL1R1  |                                                             |                            | 1780  | 1867  | 2331  | 2400  | 862   | 885   | 1504  | 1571  | 11104 | 11957 | 2721  | 2856  |
| CoV-2 HGNC:       |                                                             |                            | 2054  | 2222  | 6879  | 7865  | 3393  | 3577  | 3356  | 3720  | 13596 | 20379 |       |       |

**Table S2. Summary of cell segmentation results**

| Sample name                                         | 1-2C      | 2-1A      | 3-1A      | 4-3B      | 5-3B      | PBC-PR   | Total      |
|-----------------------------------------------------|-----------|-----------|-----------|-----------|-----------|----------|------------|
| Total Reads                                         | 1,137,704 | 2,380,636 | 1,441,118 | 1,161,277 | 3,424,675 | 869,453  | 10,414,863 |
| Number of Genes                                     | 222       | 222       | 222       | 222       | 222       | 221      |            |
| Total Segmented Reads                               | 1,074,491 | 2,224,394 | 1,339,792 | 1,112,148 | 3,231,976 | 773,102  | 9,755,903  |
| Percentages of Segmented Reads (%)                  | 94.44381  | 93.43696  | 92.96893  | 95.7694   | 94.37322  | 88.9182  | 93         |
| Total Cells                                         | 186,659   | 406,963   | 276,676   | 227,585   | 470,294   | 151,282  | 1,719,459  |
| Total Cells with Cell Type Marker Gene              | 137,260   | 317,259   | 193,293   | 163,431   | 369,042   | 126,531  | 1,306,816  |
| Percentages of Cells with Cell Type Marker Gene (%) | 73.53516  | 77.9577   | 69.86258  | 71.81097  | 78.47049  | 83.63916 |            |
| Total Cells after Filtering                         | 67,701    | 196,221   | 87,701    | 74,843    | 287,832   | 62,674   | 776,972    |
| Average Transcripts per Cell                        | 5.756469  | 5.465852  | 4.842476  | 4.886758  | 6.87226   | 5.110371 |            |



**Table S3. Summary of cell typing results and SARS-CoV-2 infection status**

| Sample Name                  | Alveolar | Macroph | Fibroblast | Vascular | T cells | Granulocyte | B cells | Dendritic | Epithelial | Smooth | NK cells | Ciliated | Ionocyte | Basal  | mesothelial | Brush  | Lymphocyte | Erythrocyte | Total  |
|------------------------------|----------|---------|------------|----------|---------|-------------|---------|-----------|------------|--------|----------|----------|----------|--------|-------------|--------|------------|-------------|--------|
| <b>1-2C</b> Number of Cells  | 19111    | 14470   | 10097      | 8621     | 2936    | 2165        | 1831    | 1695      | 1622       | 1612   | 1574     | 969      | 275      | 209    | 199         | 142    | 118        | 55          | 67701  |
| Cell Type Percentage(%)      | 28.229   | 21.373  | 14.914     | 12.734   | 4.3367  | 3.1979      | 2.7045  | 2.5037    | 2.3958     | 2.3811 | 2.3249   | 1.4313   | 0.4062   | 0.3087 | 0.2939      | 0.2097 | 0.1743     | 0.0812      | 100    |
| Number of infected Cells     | 336      | 179     | 152        | 115      | 51      | 32          | 20      | 19        | 30         | 29     | 26       | 23       | 6        | 4      | 2           | 1      | 1          | 0           | 690    |
| Infected Cell Percentage (%) | 1.7581   | 1.237   | 1.5054     | 1.334    | 1.7371  | 1.4781      | 1.0923  | 1.1209    | 1.8496     | 1.799  | 1.6518   | 2.3736   | 2.1818   | 1.9139 | 1.005       | 0.7042 | 0.8475     | 0           | 0.0102 |
| <b>2-1A</b> Number of Cells  | 28,779   | 40357   | 25625      | 16635    | 13360   | 9856        | 20629   | 3120      | 12470      | 3392   | 11793    | 2792     | 2113     | 2018   | 957         | 1038   | 222        | 1065        | 167442 |
| Cell Type Percentage (%)     | 14.667   | 20.567  | 13.059     | 8.4777   | 6.8086  | 5.0229      | 10.513  | 1.59      | 6.3551     | 1.7287 | 6.0101   | 1.4229   | 1.0768   | 1.0284 | 0.4877      | 0.529  | 0.1131     | 0.5428      | 100    |
| Number of infected Cells     | 501      | 660     | 350        | 301      | 309     | 210         | 653     | 49        | 228        | 66     | 258      | 56       | 30       | 50     | 14          | 17     | 4          | 15          | 3771   |
| Infected Cell Percentage (%) | 1.7409   | 1.6354  | 1.3659     | 1.8094   | 2.3129  | 2.1307      | 3.1654  | 1.5705    | 1.8284     | 1.9458 | 2.1877   | 2.0057   | 1.4198   | 2.4777 | 1.4629      | 1.6378 | 1.8018     | 1.4085      | 0.0225 |
| <b>3-1A</b> Number of Cells  | 11,240   | 16820   | 4498       | 15384    | 5699    | 4882        | 6073    | 2212      | 5766       | 1882   | 8064     | 1285     | 1189     | 1126   | 332         | 584    | 118        | 547         | 87,701 |
| Cell Type Percentage (%)     | 12.816   | 19.179  | 5.1288     | 17.541   | 6.4982  | 5.5666      | 6.9247  | 2.5222    | 6.5746     | 2.1459 | 9.1949   | 1.4652   | 1.3557   | 1.2839 | 0.3786      | 0.6659 | 0.1345     | 0.6237      | 100    |
| Number of infected Cells     | 363      | 224     | 91         | 276      | 97      | 66          | 131     | 31        | 83         | 43     | 112      | 24       | 17       | 14     | 2           | 8      | 2          | 7           | 1591   |
| Infected Cell Percentage (%) | 3.2295   | 1.3317  | 2.0231     | 1.7941   | 1.7021  | 1.3519      | 2.1571  | 1.4014    | 1.4395     | 2.2848 | 1.3889   | 1.8677   | 1.4298   | 1.2433 | 0.6024      | 1.3699 | 1.6949     | 1.2797      | 0.0181 |
| <b>4-3B</b> Number of Cells  | 17,337   | 15485   | 4825       | 10434    | 4132    | 3179        | 4698    | 1931      | 3683       | 1974   | 4080     | 1278     | 689      | 459    | 183         | 259    | 60         | 157         | 74,843 |
| Cell Type Percentage (%)     | 23.164   | 20.69   | 6.4468     | 13.941   | 5.5209  | 4.2476      | 6.2771  | 2.5801    | 4.921      | 2.6375 | 5.4514   | 1.7076   | 0.9206   | 0.6133 | 0.2445      | 0.3461 | 0.0802     | 0.2098      | 100    |
| Number of infected Cells     | 402      | 267     | 96         | 209      | 94      | 67          | 144     | 32        | 80         | 50     | 90       | 26       | 21       | 9      | 6           | 5      | 3          | 1           | 1602   |
| Infected Cell Percentage (%) | 2.3187   | 1.7242  | 1.9896     | 2.0031   | 2.2749  | 2.1076      | 3.0651  | 1.6572    | 2.1721     | 2.5329 | 2.2059   | 2.0344   | 3.0479   | 1.9608 | 3.2787      | 1.9305 | 5          | 0.6369      | 0.0214 |
| <b>5-3B</b> Number of Cells  | 42,922   | 50411   | 40691      | 24428    | 17326   | 15181       | 20224   | 4651      | 24242      | 8788   | 21432    | 5747     | 2828     | 4558   | 929         | 1435   | 147        | 1892        | #####  |
| Cell Type Percentage (%)     | 14.912   | 17.514  | 14.137     | 8.4869   | 6.0195  | 5.2743      | 7.0263  | 1.6159    | 8.4223     | 3.0532 | 7.446    | 1.9967   | 0.9825   | 1.5836 | 0.3228      | 0.4986 | 0.0511     | 0.6573      | 100    |
| Number of infected Cells     | 978      | 1319    | 893        | 768      | 501     | 443         | 524     | 135       | 705        | 258    | 840      | 130      | 89       | 108    | 46          | 33     | 3          | 66          | 7839   |
| Infected Cell Percentage (%) | 2.2786   | 2.6165  | 2.1946     | 3.1439   | 2.8916  | 2.9181      | 2.591   | 2.9026    | 2.9082     | 2.9358 | 3.9194   | 2.262    | 3.1471   | 2.3695 | 4.9516      | 2.2997 | 2.0408     | 3.4884      | 0.0272 |
| <b>PBC-</b> Number of Cells  | 27378    | 5719    | 9465       | 7717     | 1491    | 1638        | 1173    | 736       | 1262       | 3290   | 629      | 922      | 139      | 159    | 185         | 145    | 199        | 29          | 62276  |
| Cell Type Percentage (%)     | 43.962   | 9.1833  | 15.198     | 12.392   | 2.3942  | 2.6302      | 1.8836  | 1.1818    | 2.0265     | 5.2829 | 1.01     | 1.4805   | 0.2232   | 0.2553 | 0.2971      | 0.2328 | 0.3195     | 0.0466      | 100    |

**Table S4. Global spatial correlations between local SARS-CoV-2 infection rates and cell densities by global Moran's I.**

| Sample name     | 1-2C  | 2-1A  | 3-1A  | 4-3B  | 5-3B  |
|-----------------|-------|-------|-------|-------|-------|
| Coefficient (r) | 0.325 | 0.636 | 0.287 | 0.248 | 0.078 |

**Table S5. Cell composition signatures identified by sparse non-negative matrix factorization (SNMF)**

|                | Normal-like<br>Alveoli | Bronchile | Broad<br>immune<br>infiltration | ACs w/MM<br>infiltration | VECs w/MM<br>infiltration | VECs w/NK<br>infiltration | High<br>fibroblasts<br>w/ MM |
|----------------|------------------------|-----------|---------------------------------|--------------------------|---------------------------|---------------------------|------------------------------|
| n-Alveolar     | 0.5643179              | 0.0121138 | 0                               | 0.6477053                | 0.0404455                 | 0                         | 0.0336691                    |
| n-B            | 0.0177815              | 0         | 0.2864881                       | 0.0001489                | 0.0357681                 | 0.0298888                 | 0.0017179                    |
| n-Basal        | 0                      | 0.1029554 | 0.0025063                       | 0                        | 0                         | 0.0135613                 | 0                            |
| n-Brush        | 0                      | 0         | 0.0019199                       | 0                        | 0                         | 0.0032618                 | 0                            |
| n-Ciliated     | 0.0105512              | 0.1403089 | 0.002555                        | 0.002187                 | 0.0131246                 | 0                         | 0.0055952                    |
| n-Dendritic    | 0.0076009              | 0.006494  | 0.0079063                       | 0.0128054                | 0.0373424                 | 0.0272293                 | 0                            |
| n-Epithelial   | 0                      | 0.6141461 | 0.0867002                       | 0.0092846                | 0                         | 0.1219462                 | 0                            |
| n-Erythrocyte  | 0                      | 0.0014696 | 0.0023376                       | 0                        | 0                         | 0.0068894                 | 0                            |
| n-Fibroblasts  | 0.1193691              | 0         | 0                               | 0                        | 0.031177                  | 0                         | 0.7342991                    |
| n-Granulocytes | 0.0125711              | 0.0494878 | 0.0963014                       | 0.0253557                | 0.0136434                 | 0.1360229                 | 0.0080645                    |
| n-Ionocytes    | 0                      | 0         | 0.0145924                       | 0                        | 0.0018038                 | 0.0202377                 | 0                            |
| n-Lymphatic    | 0                      | 0         | 0                               | 0                        | 0                         | 0                         | 0                            |
| n-Macrophages  | 0                      | 0.0162048 | 0.2233146                       | 0.2728252                | 0.4667314                 | 0                         | 0.1577208                    |
| n-Mesothelial  | 0                      | 0         | 0                               | 0                        | 0                         | 0                         | 0                            |
| n-NK           | 0                      | 0.0066883 | 0.0999384                       | 0.0296879                | 0                         | 0.3184191                 | 0.0179067                    |
| n-Smooth       | 0.0529362              | 0.0501313 | 0                               | 0                        | 0.0099377                 | 0.0428492                 | 0.0410268                    |
| n-T            | 0.0294544              | 0         | 0.17544                         | 0                        | 0.0869477                 | 0.0040867                 | 0                            |
| n-Vascular     | 0.1854178              | 0         | 0                               | 0                        | 0.2630784                 | 0.2756075                 | 0                            |

**Table S6. Spearman Correlations of Pseudotime Trajectory A versus Gene Expressions**

| Gene    | ACs        | VECs      | Fibroblasts | MMs       | NK cells  | T cells   | B cells   | Granulocytes |
|---------|------------|-----------|-------------|-----------|-----------|-----------|-----------|--------------|
| A2M     | -0.2765578 | -0.285168 | -0.238348   | -0.182516 | -0.229521 | -0.249141 | -0.223907 | -0.2508999   |
| ACE2    |            |           | 0.043395    |           |           | 0.061204  |           |              |
| ACTA2   | -0.1070443 | -0.084294 | -0.149374   | -0.054684 |           |           |           | -0.07261664  |
| AGER    | -0.0464048 | -0.124302 |             |           | -0.069421 |           |           |              |
| AGRP    |            |           |             |           |           |           |           | -0.06517783  |
| AIRE    |            |           | 0.044831    |           |           |           |           |              |
| AP1S2   |            | -0.085735 |             |           |           |           |           |              |
| APOE    |            | -0.057446 |             | -0.164077 | -0.089098 | -0.054176 | -0.12528  | -0.08344893  |
| ARG1    |            |           | 0.046766    | 0.063714  |           |           | 0.044833  |              |
| ASCL1   |            |           |             |           |           |           |           | -0.0473939   |
| BATF3   |            |           |             |           |           |           |           | 0.044194834  |
| C1QA    |            |           |             | -0.078339 |           |           |           |              |
| C1QB    | 0.0867708  |           | 0.059652    |           |           |           |           | 0.061753909  |
| C2      |            |           |             | -0.045239 |           |           | -0.042925 |              |
| C3      |            | -0.045129 |             |           | -0.076592 | -0.048363 | -0.043823 |              |
| CAV1    | -0.1734009 | -0.188403 | -0.157273   | -0.090972 | -0.120304 | -0.05613  | -0.11769  | -0.12119816  |
| CCL17   |            |           |             |           |           | 0.0635    |           |              |
| CCL2    |            |           |             |           | -0.052658 |           |           |              |
| CCL5    |            |           |             |           |           | 0.04699   |           |              |
| CCR2    |            |           | 0.051705    |           |           |           |           |              |
| CCR5    |            |           | 0.054213    |           |           |           |           |              |
| CCR6    |            |           |             |           |           |           |           | 0.045881367  |
| CD163   |            |           |             | -0.046732 |           |           |           | -0.04655853  |
| CD19    | 0.0438856  |           |             |           |           |           |           |              |
| CD274   |            |           |             |           |           |           |           | -0.04879447  |
| CD28    |            |           |             |           |           | 0.059283  |           | 0.046970801  |
| CD34    | -0.0782965 | -0.120828 | -0.099378   |           | -0.071386 |           |           |              |
| CD3E    |            |           |             |           |           |           | 0.0501    |              |
| CD4     |            |           | 0.046742    |           | -0.046078 | -0.086732 |           |              |
| CD40    |            |           | 0.056504    |           | -0.052999 |           |           |              |
| CD40LG  | 0.0655237  | 0.058233  | 0.046805    |           |           | 0.069183  |           | 0.06671726   |
| CD44    | -0.0692463 | -0.062723 |             | -0.0675   |           |           | -0.048534 | -0.07242388  |
| CD68    |            |           |             |           | 0.053609  |           |           | 0.061876787  |
| CD7     |            |           | 0.053738    |           |           |           |           |              |
| CD79A   | 0.061052   |           |             |           |           |           |           |              |
| CD79B   |            |           |             |           |           |           | -0.075542 |              |
| CD80    |            |           | 0.058972    |           | 0.05314   |           |           | 0.074283622  |
| CD8A    |            |           | 0.049234    | 0.054959  |           | 0.070571  |           | 0.063172204  |
| CD8B    |            |           |             |           |           | 0.052538  |           |              |
| CEACAM8 | 0.0634125  |           | 0.063658    |           |           |           |           | 0.211105625  |
| CFP     |            |           |             |           |           |           |           | 0.043873213  |
| CLDN5   |            | -0.080936 | -0.055542   |           |           | -0.065148 |           | -0.0632258   |
| CLEC10A | 0.080319   | 0.050673  | 0.050981    | 0.06959   |           | 0.070331  |           |              |

|        |            |           |           |           |           |           |           |             |             |
|--------|------------|-----------|-----------|-----------|-----------|-----------|-----------|-------------|-------------|
| CLEC5A |            |           |           |           |           |           |           |             | -0.04331821 |
| COL1A1 | -0.0434716 |           | 0.095684  |           |           | -0.044134 |           |             |             |
| COL1A2 | -0.1288032 | -0.077353 |           |           |           |           |           | -0.071241   | -0.04643754 |
| COL6A1 |            |           |           |           |           | -0.051441 |           |             |             |
| CPA3   |            |           |           |           |           | -0.04277  |           |             | -0.05276376 |
| CSF3   | 0.0825488  | 0.055434  | 0.057477  |           |           |           |           |             |             |
| CTSB   |            |           |           | -0.123315 | -0.066372 | -0.06243  |           | -0.049898   |             |
| CTSL   | 0.1555903  | 0.134861  | 0.082006  | 0.109746  |           | 0.064454  | 0.060173  | 0.142779746 |             |
| CX3CR1 |            |           |           |           |           |           |           | -0.04356    |             |
| CXCL16 |            |           |           | -0.050227 |           |           |           |             |             |
| CXCL2  | -0.0819782 | -0.070601 | -0.074434 |           | -0.052996 | -0.047334 |           | -0.056277   |             |
| CXCL5  |            |           |           |           |           |           |           | 0.043694    |             |
| CXCL9  |            |           |           |           |           | -0.047127 |           |             |             |
| CXCR2  |            |           |           |           |           | 0.045496  |           |             | 0.057255351 |
| CXCR3  | 0.0534724  | 0.073938  | 0.07601   | 0.04483   | 0.082672  |           |           |             | 0.091774059 |
| CXCR5  | 0.0936446  | 0.055021  | 0.10011   | 0.055826  |           |           | 0.073588  | 0.056048048 |             |
| CXCR6  | 0.0586824  |           | 0.093284  | 0.043907  |           |           |           |             | 0.051339988 |
| DES    |            |           | -0.052901 |           |           |           |           |             |             |
| EDN1   | -0.0567181 | -0.047026 | -0.05669  |           |           | -0.053867 |           |             | -0.0593376  |
| EOMES  | 0.0643587  |           |           | 0.055331  |           | 0.069938  |           |             | 0.046845356 |
| FBLN1  | -0.0936202 | -0.097959 | -0.109604 | -0.048301 | -0.086736 | -0.063898 |           |             | -0.09633971 |
| FCGR1A |            |           |           |           |           | -0.04277  |           |             |             |
| FCGR3B |            |           |           | -0.04382  | -0.047063 |           |           |             | 0.050848563 |
| FKBP11 | 0.0833244  | 0.078857  |           | 0.078018  | 0.069366  |           | 0.075718  | 0.049317294 |             |
| FOXI1  | 0.0456297  |           |           |           |           |           |           |             | 0.049750788 |
| FUT4   | 0.0546642  | 0.07476   | 0.050612  | 0.04718   |           | 0.054029  |           |             |             |
| GATA2  |            |           |           |           |           | -0.044676 |           |             |             |
| GJA5   |            |           |           |           | -0.058265 |           |           |             |             |
| GYPA   |            |           |           |           |           |           | 0.055007  |             |             |
| GZMK   | 0.1124151  | 0.11247   | 0.113746  | 0.090556  | 0.067483  | 0.12196   | 0.077234  | 0.116377053 |             |
| ICOS   |            |           |           |           | 0.043273  |           |           |             |             |
| ICOSLG | 0.0890651  | 0.080021  | 0.100679  |           | 0.066888  |           |           |             |             |
| IDO1   |            |           |           |           | -0.04533  |           |           |             |             |
| IFIH1  |            |           | -0.042804 |           |           |           |           |             |             |
| IFITM2 | -0.0499703 | -0.066448 |           |           |           | -0.066731 | -0.057621 | -0.09603561 |             |
| IFITM3 |            | -0.111749 |           | -0.052976 | -0.138866 | -0.102936 | -0.07538  | -0.12173662 |             |
| IFNG   | 0.0564185  | 0.048542  | 0.066231  | 0.058263  |           |           |           |             |             |
| IFNGR1 | -0.068489  | -0.075191 | -0.072411 | -0.046442 | -0.063603 | -0.043599 |           |             | -0.07228366 |
| IFNGR2 |            | -0.053552 |           |           |           |           |           |             |             |
| IGKC   | 0.1358517  | 0.110124  | 0.130462  |           |           |           |           |             |             |
| IL10RB |            |           |           |           |           | 0.043795  | 0.050399  |             |             |
| IL17A  | 0.0427097  |           |           |           |           |           |           |             |             |
| IL1A   | 0.0579209  | 0.045525  | 0.048089  |           |           | 0.052517  |           |             |             |
| IL1B   |            |           |           |           | -0.042758 | -0.046179 |           |             |             |
| IL1R1  |            |           |           |           |           | -0.045698 | -0.066127 | -0.04663377 |             |

|        |            |           |           |           |           |           |           |             |
|--------|------------|-----------|-----------|-----------|-----------|-----------|-----------|-------------|
| IL2    |            |           | 0.043067  |           |           |           |           |             |
| IL22   |            | 0.046282  |           |           |           |           |           |             |
| IL27   |            |           | 0.045304  |           |           |           |           |             |
| IL2RA  | 0.047885   |           |           |           |           | -0.048032 |           |             |
| IL33   |            |           |           |           |           |           |           | -0.04506483 |
| IL3RA  |            |           |           |           |           | -0.042991 |           |             |
| IL4    |            | 0.046986  |           |           |           | 0.052446  |           |             |
| IL6    |            |           | -0.0546   |           |           |           |           | -0.05910199 |
| IL6R   |            |           |           |           |           | -0.042505 |           |             |
| IL6ST  | -0.0570582 | -0.070271 | -0.098127 |           |           | -0.066205 |           |             |
| INMT   | -0.1212277 | -0.066216 | -0.147888 |           |           |           | -0.053286 |             |
| ISG15  | 0.0567547  |           |           |           |           |           |           | 0.053995743 |
| ITLN1  |            |           |           |           |           |           |           | 0.056264167 |
| JCHAIN | 0.0478496  | 0.045442  | 0.054362  |           |           |           |           | -0.04797501 |
| KIT    | -0.0677552 | -0.08017  | -0.05075  |           |           |           |           | -0.04424782 |
| KLRC2  |            |           |           |           |           |           |           | 0.045877299 |
| KLRD1  |            |           |           |           |           | -0.04341  |           |             |
| KRT13  |            |           |           |           |           | -0.048733 |           | 0.045118996 |
| KRT15  |            |           |           |           |           | -0.04434  |           |             |
| KRT19  |            |           |           |           |           | -0.043261 |           |             |
| LEF1   |            |           |           |           |           |           | 0.042944  |             |
| LGR6   |            |           |           |           |           |           | 0.044754  |             |
| LST1   | 0.11908    | 0.137493  | 0.077651  | 0.07928   |           | 0.073122  | 0.047908  | 0.08865345  |
| LTF    |            |           |           |           |           | 0.047044  |           |             |
| MGP    | -0.0431061 | -0.054076 |           |           |           |           |           | -0.07369367 |
| MKI67  |            |           |           |           |           |           |           | 0.052051356 |
| MRC1   |            |           |           | -0.048254 |           |           |           |             |
| MS4A2  |            |           |           |           |           |           |           | 0.092534008 |
| MSLN   |            |           | -0.04623  |           |           |           |           | -0.04534354 |
| MUC1   |            |           |           |           |           | -0.057608 |           | 0.045367682 |
| MUC5B  | 0.0802862  | 0.056127  |           |           |           |           |           |             |
| NCAM1  | 0.1151786  | 0.04776   | 0.103537  | 0.097938  | 0.077103  |           |           | 0.090689078 |
| NKG7   |            |           |           |           | -0.068881 |           |           |             |
| NRP1   | -0.0589314 | -0.070173 | -0.050651 | -0.061653 | -0.08547  |           | -0.050626 |             |
| PCSK1N |            |           |           | 0.043314  |           | 0.04325   |           | -0.06915208 |
| PDCD1  |            |           |           | 0.043172  | 0.045251  |           |           |             |
| PECAM1 | -0.0425713 | -0.084631 | -0.04948  |           |           |           |           |             |
| PF4    |            |           |           |           | -0.049737 |           |           |             |
| PLAC8  |            |           |           |           | 0.045747  |           |           |             |
| PPARG  |            |           |           |           | 0.073269  |           |           |             |
| PRG4   | -0.0611091 |           | -0.080717 | -0.065106 |           |           |           | -0.06883645 |
| PTN    |            |           |           |           | -0.046331 |           |           |             |
| PTPRC  |            |           |           |           |           |           |           | -0.09296068 |
| RETN   |            |           | 0.067828  |           |           | 0.056703  |           |             |
| S100A8 |            |           | 0.059619  |           |           |           | -0.046239 |             |





**Table S7. Spearman Correlations of Pseudotime Trajectory B versus Gene Expressions**

| Gene    | ACs      | VECs     | Fibroblasts | MMs      | NK cells | T cells  | B cells  | Granulocytes |
|---------|----------|----------|-------------|----------|----------|----------|----------|--------------|
| A2M     | -0.23417 | -0.18242 | -0.18695    | -0.11699 | -0.07008 | -0.13915 | -0.11668 | -0.199064005 |
| ACE2    |          |          |             |          |          | 0.047165 |          |              |
| ACKR1   |          | 0.048854 |             |          |          |          | -0.04833 |              |
| ACTA2   | -0.09122 | -0.10498 | -0.09113    |          |          | -0.04457 |          |              |
| AGER    | -0.0654  | -0.12614 | -0.04869    |          |          |          |          |              |
| AGRP    | 0.049945 |          |             |          |          |          |          |              |
| AP1S2   | -0.04246 | -0.07303 |             |          |          |          | -0.04535 |              |
| APOE    |          |          |             | -0.07856 |          | -0.03913 |          |              |
| ARG1    | 0.047952 |          |             |          |          | 0.046863 |          |              |
| ASCL1   |          |          |             |          |          |          |          | -0.037819398 |
| BATF3   |          |          |             |          |          | 0.037658 |          |              |
| C1QA    | 0.058691 |          |             |          |          |          |          | 0.09027356   |
| C1QB    | 0.117966 | 0.054073 | 0.089102    | 0.096327 |          |          | 0.058879 | 0.125662283  |
| C3      |          |          |             |          |          |          |          | -0.063321455 |
| CAV1    | -0.15927 | -0.18698 | -0.14654    | -0.07419 | -0.07115 | -0.05335 | -0.04429 | -0.103846221 |
| CCL2    |          |          |             |          |          | 0.056462 |          | 0.041291612  |
| CCR2    | 0.06541  | 0.063104 |             | 0.046706 |          | 0.038923 |          | 0.045579992  |
| CCR4    |          | 0.05497  | 0.03879     |          |          |          |          |              |
| CCR5    | 0.06756  |          |             | 0.037975 | 0.051752 |          |          |              |
| CCR6    |          |          |             |          | 0.045262 |          |          |              |
| CD163   |          |          |             |          |          |          |          | 0.037295985  |
| CD19    | 0.060925 | 0.040203 | 0.041826    |          |          |          | 0.044888 |              |
| CD34    | -0.0689  | -0.09669 | -0.06878    |          | -0.0509  |          |          |              |
| CD4     | 0.049011 |          |             |          |          |          |          |              |
| CD40    | 0.039212 |          |             |          |          |          | 0.058188 |              |
| CD40LG  | 0.107726 | 0.077691 |             | 0.045761 |          | 0.08453  |          | 0.068746563  |
| CD44    | -0.05332 |          |             |          | 0.052098 |          |          | -0.050139472 |
| CD68    |          |          |             | -0.07668 |          |          |          |              |
| CD7     |          |          |             |          |          | 0.052587 |          |              |
| CD79A   | 0.08843  |          | 0.042754    |          |          |          | 0.092262 |              |
| CD79B   |          |          |             |          |          |          | -0.12707 |              |
| CD83    |          |          |             |          |          |          |          | 0.047211302  |
| CD8A    |          |          |             |          |          |          | 0.038345 |              |
| CEACAM8 | 0.067966 |          |             |          |          |          | 0.055024 | 0.214210161  |
| CFTR    |          |          |             |          |          |          | 0.054296 |              |
| CLDN5   | -0.0661  | -0.08001 | -0.08032    |          |          | -0.1043  | -0.05523 | -0.079253269 |
| CLEC10A | 0.068948 | 0.065709 | 0.055969    | 0.057083 |          | 0.074607 |          |              |
| COL1A1  |          |          | 0.238038    |          | 0.050449 |          | 0.063025 |              |
| COL1A2  | -0.08054 |          | 0.074501    |          |          |          | 0.060741 | -0.043885551 |
| CPA3    |          |          |             |          |          | -0.0388  |          | -0.058816528 |
| CSF3    | 0.113034 | 0.10195  | 0.072741    | 0.102288 | 0.071468 |          | 0.088778 | 0.098683964  |
| CTSB    |          |          |             | -0.04035 |          |          |          | 0.055171045  |
| CTSL    | 0.104649 | 0.07678  | -0.04173    |          |          |          | -0.06617 |              |

|        |          |          |          |          |          |          |          |              |
|--------|----------|----------|----------|----------|----------|----------|----------|--------------|
| CX3CR1 |          |          |          |          | 0.043399 |          | -0.04299 |              |
| CXCL2  | -0.07253 | -0.0844  | -0.05969 | -0.05841 | -0.06559 | -0.05153 | -0.04755 |              |
| CXCL5  |          |          |          |          |          |          |          | 0.03806835   |
| CXCL9  |          |          |          |          |          | -0.03978 |          |              |
| CXCR3  | 0.069483 | 0.048237 |          |          | 0.037495 |          |          | 0.085780591  |
| CXCR5  | 0.125108 | 0.091302 | 0.039747 | 0.064412 |          | 0.053469 | 0.056036 |              |
| CXCR6  | 0.056839 | 0.055155 | 0.063929 |          |          |          |          | 0.057363906  |
| DES    |          |          |          |          |          | 0.055714 | 0.041941 |              |
| EDN1   | -0.04828 |          | -0.04554 |          |          |          |          |              |
| EOMES  | 0.084288 | 0.076171 |          | 0.045833 |          |          |          | 0.050475746  |
| FABP4  |          |          |          | -0.03939 |          |          |          |              |
| FBLN1  | -0.07795 | -0.06019 | -0.0729  | -0.04823 |          |          | -0.06675 | -0.099788911 |
| FCGR2A |          | 0.044455 |          |          |          |          |          |              |
| FCGR3B | 0.040975 | 0.037913 |          |          |          |          |          | 0.072317848  |
| FKBP11 | 0.063241 | 0.040355 | 0.056659 |          |          |          |          |              |
| FOLR2  |          |          |          |          |          | -0.04681 |          |              |
| FOXI1  | 0.045565 |          |          |          |          |          |          |              |
| FOXN4  |          |          |          |          |          | 0.043416 | 0.043758 |              |
| FOXP3  | 0.039537 |          | 0.050424 |          | 0.048612 |          | 0.060758 | 0.056544832  |
| FURIN  |          |          |          |          |          |          | 0.045908 |              |
| FUT4   | 0.08674  | 0.072236 | 0.040281 | 0.06246  |          | 0.044159 |          |              |
| GATA2  |          |          |          |          |          | -0.04118 |          |              |
| GJA5   | 0.042105 | 0.043181 |          |          |          |          |          |              |
| GNLY   | 0.049135 |          |          |          |          |          | 0.039547 |              |
| GPR183 |          |          |          |          |          |          | -0.05082 |              |
| GYPA   |          | 0.044047 |          |          |          |          |          |              |
| GZMK   | 0.162548 | 0.117448 | 0.066982 | 0.07485  |          | 0.102471 | 0.053519 | 0.121910499  |
| HPGDS  |          |          |          |          |          |          |          | -0.058750952 |
| ICAM1  |          |          |          |          |          |          | 0.051938 |              |
| ICOSLG | 0.094865 | 0.108561 | 0.059662 | 0.058779 | 0.06085  | 0.041286 | 0.046443 | 0.048873673  |
| IDO1   |          | 0.039485 |          |          |          | 0.037285 |          |              |
| IFITM3 |          |          |          |          |          |          |          | -0.0401819   |
| IFNB1  |          |          |          |          | 0.064311 |          |          |              |
| IFNG   |          | 0.047643 |          |          | -0.03724 |          |          | 0.04148565   |
| IFNGR1 | -0.06606 | -0.06479 | -0.04459 |          | -0.06533 | -0.0605  |          | -0.043583766 |
| IFNGR2 |          | -0.04789 |          |          |          |          |          | 0.041613098  |
| IGKC   | 0.200164 | 0.207234 | 0.10137  | 0.08933  | 0.115094 | 0.106026 | 0.061718 | 0.065923338  |
| IGLL5  |          |          |          |          | 0.045037 |          |          |              |
| IL10RB |          |          | 0.04243  |          | 0.042023 | 0.043005 |          |              |
| IL17A  | 0.051116 | 0.052451 |          |          |          |          | 0.049536 |              |
| IL1A   | 0.061588 | 0.050096 |          |          |          |          |          |              |
| IL1B   |          | 0.038184 |          |          |          |          | 0.038756 |              |
| IL22   |          |          |          |          |          |          | 0.041126 | 0.037526937  |
| IL27   | 0.040339 |          |          |          |          |          |          |              |
| IL2RA  | 0.073001 |          |          |          | 0.053015 |          | 0.054686 |              |

|        |          |          |          |          |          |          |          |              |
|--------|----------|----------|----------|----------|----------|----------|----------|--------------|
| IL33   |          |          | -0.03945 |          |          |          |          | -0.03722     |
| IL3RA  |          |          |          |          |          |          |          | 0.043497     |
| IL4    | 0.03914  |          |          |          |          |          |          |              |
| IL5    |          |          |          |          |          | 0.065467 | 0.045197 |              |
| IL6    |          |          |          |          |          |          |          | -0.053733035 |
| IL6R   |          |          |          |          |          |          | 0.044341 |              |
| IL6ST  | -0.05528 |          |          |          |          |          |          |              |
| IL7R   |          | -0.04831 |          |          |          | -0.05257 |          |              |
| INMT   | -0.12332 | -0.06816 | -0.19792 |          |          |          |          | -0.06262     |
| ISG15  | 0.066814 | 0.038402 | 0.040259 |          |          |          |          |              |
| ITLN1  | 0.044288 |          |          |          |          |          |          | 0.049348458  |
| JCHAIN | 0.082298 | 0.052541 |          |          | 0.063171 | 0.058752 |          |              |
| KIT    | -0.05272 | -0.08017 |          |          |          |          |          | -0.053323915 |
| KLRC2  |          |          |          |          | -0.04922 |          | 0.050395 |              |
| KLRD1  |          |          |          |          |          |          | 0.044409 |              |
| KRT13  |          |          |          |          |          |          |          | 0.041034312  |
| KRT14  | 0.040772 |          |          |          |          |          |          |              |
| KRT15  | 0.046743 |          |          |          |          |          |          |              |
| LST1   | 0.176173 | 0.140293 | 0.075228 | 0.097155 | 0.048409 | 0.150042 | 0.066195 | 0.117086543  |
| LTF    |          |          |          |          |          | 0.058064 |          |              |
| MGP    |          |          |          |          | 0.060665 |          |          | -0.047453011 |
| MRC1   |          |          |          |          | 0.039171 |          |          |              |
| MSLN   |          |          |          |          |          |          | -0.04002 | -0.053807806 |
| MUC5AC |          |          |          |          |          |          | -0.04623 |              |
| MUC5B  | 0.100919 | 0.037387 | 0.038258 |          |          | 0.037932 |          |              |
| MX1    | 0.037898 |          |          |          |          |          |          |              |
| NCAM1  | 0.129607 | 0.038924 | 0.070591 | 0.060254 | 0.040041 |          |          | 0.054425241  |
| NRP1   | -0.0381  | -0.04668 |          | -0.05298 |          |          |          |              |
| PAX5   |          |          |          |          |          |          |          | 0.053371989  |
| PCSK1N |          |          |          |          |          |          |          | -0.076337283 |
| PDCD1  |          |          | 0.037544 |          |          |          |          |              |
| PECAM1 | -0.04893 | -0.09513 | -0.05137 | -0.04777 | -0.06127 |          |          |              |
| PLAC8  | 0.039513 |          |          |          |          |          |          |              |
| PLIN2  |          | 0.049445 |          |          |          |          |          |              |
| PPARG  | 0.037847 |          |          |          |          |          |          |              |
| PRF1   |          |          |          |          |          |          | -0.04373 |              |
| PRG4   | -0.06815 | -0.04201 | -0.07122 | -0.06506 |          |          |          |              |
| PTN    |          |          | -0.03789 |          | -0.06056 |          |          |              |
| PTPRC  |          |          |          |          |          |          |          | -0.05500837  |
| RETN   | 0.066851 | 0.040041 |          |          |          |          |          |              |
| S100A8 | 0.048937 |          |          |          |          |          |          |              |
| SEMA3A |          |          |          |          | 0.059976 |          |          |              |
| SFTA2  | 0.090868 |          |          |          |          |          |          |              |
| SFTPA1 | -0.07088 | -0.05154 |          |          |          |          |          |              |
| SFTPA2 |          |          |          |          |          |          | -0.04342 |              |



|         |          |          |          |          |          |          |          |              |
|---------|----------|----------|----------|----------|----------|----------|----------|--------------|
| SFTPC   | -0.18456 | -0.09881 | -0.07617 | -0.07591 | -0.05003 | -0.06539 | -0.06338 | -0.11238912  |
| SLC18A2 | 0.059352 |          |          |          |          |          |          | 0.053280437  |
| TGFB1   |          | -0.0503  |          |          |          |          |          | 0.042625481  |
| TMPRSS2 |          |          |          |          |          | -0.04518 |          | -0.07145939  |
| TPPP3   |          |          |          |          |          |          |          | -0.038857276 |
| TPSAB1  |          | -0.04459 | -0.04399 |          |          | 0.038693 | -0.04669 | -0.291267486 |
| TYROBP  |          |          |          | -0.04596 |          |          |          |              |
